# Supplementary material for: Identification of the missing pluripotency mediator downstream of leukaemia inhibitory factor
Source: PubMed Central journal article supplement (PMC3791366; doi:10.1038/emboj.2013.177), 2013-08-13
Supplement: emboj2013177df4.pdf [file emboj2013177df4.pdf]

# Source data related to Figure 4B

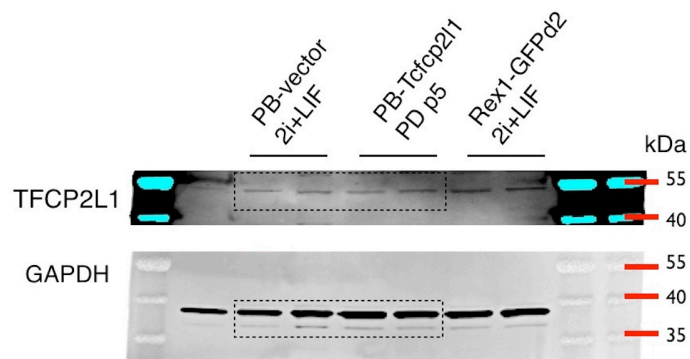

Un-cropped Western blot of Rex1GFPd2 cells un-transfected or transfected with an empty vector (PB-vector) cultured in 2i+LIF, and PB-Tfcp2l1 cells cultured in PD for 5 passages. For each line 2 biological replicates were loaded. GAPDH served as a loading control. Blots were imaged on a LI-COR Odyssey Imager.
