# Supplementary material for: Identification of the missing pluripotency mediator downstream of leukaemia inhibitory factor
Source: PubMed Central journal article supplement (PMC3791366; doi:10.1038/emboj.2013.177), 2013-08-13
Supplement: emboj2013177s2.pdf [file emboj2013177s2.pdf]

List of genes upregulated (p-value < 0.05) after LIF treatment (1h) in Stat3 wild-type cells cultured in 2i

| ENSEMBL_ID          | GENE SYMBOL | Stat3_null_2i (FPKM) | Stat3_null_2i+LIF_1h | Stat3_wt_2i (FPKM) | Stat3_wt_2i+LIF_1h | Adj_pvalue  | Fold Change |
|---------------------|-------------|----------------------|----------------------|--------------------|--------------------|-------------|-------------|
| ENSMUSG00000000308  | Ckmt1       | 10.87280574          | 11.53381236          | 3.975278346        | 9.67698789         | 8.88E-05    | 2.434291903 |
| ENSMUSG00000000409  | Lck         | 9.327416393          | 8.185729491          | 2.225449894        | 4.196919076        | 0.033249806 | 1.885874442 |
| ENSMUSG000000002325 | Irf9        | 0.995737078          | 3.752201388          | 0.913760545        | 3.390133322        | 9.42E-09    | 3.71008941  |
| ENSMUSG000000003032 | Klf4        | 5.604567897          | 6.267156598          | 8.808995703        | 16.7249052         | 0.004296651 | 1.898616569 |
| ENSMUSG000000004040 | Stat3       | 0.761242157          | 0.95023724           | 1.212505818        | 2.54080572         | 0.004944459 | 2.095499817 |
| ENSMUSG000000005672 | Kit         | 7.122007349          | 5.907731598          | 5.365805677        | 13.23797076        | 7.62E-06    | 2.467098431 |
| ENSMUSG000000006219 | Fblim1      | 1.663114325          | 1.324580365          | 2.260196173        | 5.579048025        | 9.52E-05    | 2.468391059 |
| ENSMUSG000000006345 | Ggt1        | 0.299940264          | 0.21538123           | 0.031174538        | 0.351839318        | 0.00626428  | 11.28611153 |
| ENSMUSG000000008682 | Rpl10       | 28.45748248          | 37.64902764          | 23.70195743        | 40.77779561        | 0.015085413 | 1.720439998 |
| ENSMUSG000000010607 | Pigyl       | 21.2825985           | 19.19986357          | 16.92906326        | 29.79315833        | 0.03194433  | 1.759882273 |
| ENSMUSG000000013766 | Ly6g6e      | 0.113805772          | 0.101512161          | 0.310528863        | 3.161882796        | 4.89E-07    | 10.18225091 |
| ENSMUSG000000015243 | Abca1       | 0.606943062          | 0.628804042          | 0.93098085         | 2.084421659        | 0.001006047 | 2.238952239 |
| ENSMUSG000000017144 | Rnd3        | 3.869265142          | 4.641943528          | 3.2974576          | 6.109490579        | 0.01523171  | 1.852788214 |
| ENSMUSG000000017774 | Myo1c       | 7.236847736          | 6.374918679          | 4.140143819        | 8.080001271        | 0.003849208 | 1.951623331 |
| ENSMUSG000000018411 | Mapt        | 0.809118953          | 0.715913205          | 0.254156727        | 0.716800255        | 0.003195931 | 2.820308015 |
| ENSMUSG000000018899 | Irf1        | 10.49490231          | 18.77788232          | 6.909445017        | 13.67385297        | 0.002348115 | 1.979008869 |
| ENSMUSG000000020333 | Acsl6       | 0.282810571          | 0.323450335          | 0.140951547        | 0.406803264        | 0.009465109 | 2.886121305 |
| ENSMUSG000000020788 | Atp2a3      | 0.701257046          | 0.676997001          | 0.261650855        | 0.836183671        | 0.001882375 | 3.195799496 |
| ENSMUSG000000021127 | Zfp3611     | 6.047486891          | 7.155911897          | 7.768739565        | 16.92644168        | 0.00020762  | 2.178788661 |
| ENSMUSG000000021678 | F2rl1       | 14.93914631          | 13.83867281          | 10.03091364        | 22.5591975         | 0.000108313 | 2.248967373 |
| ENSMUSG000000021732 | Fgf10       | 0.123974614          | 0.120667386          | 0.264279915        | 0.885658379        | 0.007306894 | 3.351213354 |
| ENSMUSG000000022101 | Fgf17       | 0.932073528          | 1.617117616          | 2.648082703        | 5.514387573        | 0.037399519 | 2.08240761  |
| ENSMUSG000000022114 | Spry2       | 11.367465            | 12.86278733          | 9.769656079        | 22.96248437        | 2.77E-05    | 2.3503882   |
| ENSMUSG000000022438 | Parvb       | 0.393681379          | 0.237895484          | 0.32010949         | 0.942579628        | 0.013163269 | 2.94455384  |
| ENSMUSG000000022750 | Klhl22      | 16.42070233          | 16.45729405          | 11.98661591        | 20.29997655        | 0.035306178 | 1.693553602 |
| ENSMUSG000000022900 | Ildr1       | 4.630518024          | 5.007822437          | 2.418881427        | 4.820816793        | 0.005946475 | 1.992994258 |
| ENSMUSG000000023048 | Prr13       | 9.370745243          | 9.438909786          | 4.191927341        | 13.76315413        | 1.14E-07    | 3.283252073 |
| ENSMUSG000000023942 | Slc29a1     | 49.97322082          | 48.72308634          | 26.14760645        | 52.57783632        | 0.001181505 | 2.010808768 |
| ENSMUSG000000023951 | Vegfa       | 2.175045223          | 2.35123266           | 0.438579866        | 1.66023673         | 1.39E-06    | 3.785483235 |
| ENSMUSG000000023987 | Pgc         | 0.410956195          | 0.424130968          | 0.503383876        | 1.712521336        | 0.031257586 | 3.402018651 |
| ENSMUSG000000023990 | Tfeb        | 0.299738576          | 0.395112552          | 0.436931913        | 1.698125748        | 5.62E-06    | 3.886476808 |
| ENSMUSG000000024014 | Pim1        | 41.42322639          | 44.10523027          | 16.98457044        | 34.46519752        | 0.00067086  | 2.02920631  |

|                    |               |             |             |             |             |             |             |
|--------------------|---------------|-------------|-------------|-------------|-------------|-------------|-------------|
| ENSMUSG00000024209 | 1700061G19Rik | 4.858421669 | 5.577474223 | 5.778207807 | 10.82661763 | 0.014660988 | 1.87369821  |
| ENSMUSG00000024349 | Tmem173       | 0.658151287 | 0.65699785  | 0.296992068 | 1.175200191 | 0.007286651 | 3.957008684 |
| ENSMUSG00000024617 | Camk2a        | 0.236930229 | 0.256134363 | 0.105749189 | 0.343643547 | 0.01863589  | 3.249609289 |
| ENSMUSG00000024738 | Pga5          | 0.809940389 | 0.819654687 | 0.289777064 | 1.72278076  | 0.000891257 | 5.945193647 |
| ENSMUSG00000025868 | Higd2a        | 33.13581195 | 34.35583906 | 13.87614721 | 25.37159845 | 0.025477546 | 1.828432494 |
| ENSMUSG00000026142 | Rhbdd1        | 5.474147358 | 5.406554938 | 2.949859859 | 5.817153986 | 0.007306894 | 1.972010287 |
| ENSMUSG00000026235 | Epha4         | 13.23649528 | 12.57640133 | 8.504565831 | 14.7323933  | 0.023954413 | 1.732292229 |
| ENSMUSG00000026380 | Tfcp2l1       | 81.30807865 | 70.11931171 | 39.48077653 | 88.74400635 | 0.003082944 | 2.247777632 |
| ENSMUSG00000026576 | Atp1b1        | 43.69703345 | 38.86786336 | 27.56769709 | 48.32776284 | 0.016125918 | 1.753057671 |
| ENSMUSG00000026656 | Fcgr2b        | 0.052537939 | 0.034195576 | 0.039489214 | 0.508826717 | 0.000197505 | 12.88520741 |
| ENSMUSG00000026959 | Grin1         | 0.046981406 | 0.033305407 | 0.053202709 | 0.22739473  | 0.007766283 | 4.274119375 |
| ENSMUSG00000027313 | Chac1         | 1.290548596 | 1.353668391 | 0.417639426 | 2.621215689 | 4.44E-07    | 6.276264949 |
| ENSMUSG00000027463 | Slc52a3       | 0.210527498 | 0.208429647 | 0.18650751  | 0.797475433 | 0.007951845 | 4.275835511 |
| ENSMUSG00000028159 | Dapp1         | 0.442039978 | 0.478755773 | 1.230987975 | 2.704509543 | 0.031174023 | 2.197023526 |
| ENSMUSG00000028194 | Ddah1         | 1.335128926 | 1.209442958 | 5.307061102 | 9.490586128 | 0.03296606  | 1.788294113 |
| ENSMUSG00000028199 | Cryz          | 13.0189953  | 12.05479534 | 4.315898279 | 9.843694403 | 0.000268685 | 2.280798519 |
| ENSMUSG00000028435 | Aqp3          | 21.87444967 | 20.09298248 | 1.917939195 | 15.33546684 | 1.40E-21    | 7.995804497 |
| ENSMUSG00000028451 | 1700022I11Rik | 0.930545283 | 0.549241415 | 0.077930612 | 0.386260147 | 0.007232926 | 4.956462362 |
| ENSMUSG00000028640 | Tfap2c        | 5.963083778 | 5.339652338 | 1.193536649 | 2.788579358 | 0.002383024 | 2.336400279 |
| ENSMUSG00000028709 | Mob3c         | 1.295434639 | 1.090748686 | 0.577141878 | 1.649281185 | 0.00642679  | 2.857670268 |
| ENSMUSG00000028927 | Padi2         | 0.449144302 | 0.425814078 | 0.036312816 | 0.317008139 | 0.001006047 | 8.729924413 |
| ENSMUSG00000028949 | Smarcd3       | 0.369197758 | 0.489667818 | 1.54111482  | 2.953819166 | 0.044836382 | 1.916676893 |
| ENSMUSG00000029718 | Pcolce        | 1.930233523 | 2.223414422 | 4.833955008 | 12.78599403 | 4.45E-06    | 2.645037864 |
| ENSMUSG00000030208 | Emp1          | 0.561793038 | 0.637939032 | 0.65816651  | 1.827873333 | 0.006284103 | 2.777220209 |
| ENSMUSG00000030523 | Trpm1         | 5.377201491 | 5.383334219 | 8.645222576 | 16.31664919 | 0.006055377 | 1.887360221 |
| ENSMUSG00000030717 | Nupr1         | 3.44143141  | 3.276290034 | 1.718006341 | 5.630577177 | 4.34E-06    | 3.277390219 |
| ENSMUSG00000030825 | Hsd17b14      | 11.14448195 | 12.37464858 | 7.699025709 | 14.8121529  | 0.005895866 | 1.923899654 |
| ENSMUSG00000031216 | Stard8        | 0.731043277 | 0.642759893 | 0.608086505 | 1.507239583 | 0.007286651 | 2.478659814 |
| ENSMUSG00000031381 | Piga          | 6.063592573 | 6.069119017 | 5.809535855 | 9.69719274  | 0.048418844 | 1.669185453 |
| ENSMUSG00000031548 | Sfrp1         | 18.01296416 | 14.89033981 | 7.177067563 | 12.42569331 | 0.030200412 | 1.731305049 |
| ENSMUSG00000031758 | Cdyl2         | 4.349665397 | 4.127698751 | 2.425217629 | 4.121624549 | 0.040504802 | 1.699486471 |
| ENSMUSG00000031770 | Herpud1       | 2.111231824 | 2.228932132 | 1.419394751 | 3.294054    | 0.006967793 | 2.320745513 |
| ENSMUSG00000032092 | Mpzl2         | 23.36812762 | 21.1361825  | 25.76731953 | 44.2714196  | 0.026214575 | 1.718122816 |
| ENSMUSG00000032291 | Crabp1        | 11.16200544 | 9.10371778  | 5.947032806 | 11.74533287 | 0.034951791 | 1.974990429 |
| ENSMUSG00000032434 | Cmtm6         | 47.77014372 | 51.57852448 | 19.40624968 | 33.09657652 | 0.020719819 | 1.705459688 |

|                    |               |             |             |             |             |             |             |
|--------------------|---------------|-------------|-------------|-------------|-------------|-------------|-------------|
| ENSMUSG00000032470 | Mras          | 1.428692377 | 1.283790312 | 1.61132279  | 5.599098389 | 3.58E-08    | 3.474845898 |
| ENSMUSG00000032796 | Lama1         | 0.585370581 | 0.465386245 | 0.873566504 | 2.140128214 | 0.00044267  | 2.449874399 |
| ENSMUSG00000033857 | Engase        | 0.738209923 | 0.780603587 | 0.292968957 | 0.902429917 | 0.002456958 | 3.080291944 |
| ENSMUSG00000034165 | Ccnd3         | 11.106899   | 9.274332929 | 8.448586571 | 15.79937153 | 0.010595574 | 1.870060915 |
| ENSMUSG00000034486 | Gbx2          | 0.144508673 | 0.22801735  | 1.100368287 | 2.854976548 | 0.001507864 | 2.59456455  |
| ENSMUSG00000034714 | Ttyh2         | 2.482075879 | 1.949516573 | 0.532162105 | 1.272399515 | 0.020403861 | 2.390999854 |
| ENSMUSG00000034799 | Unc13a        | 0.324210072 | 0.340862328 | 0.110702182 | 0.300703187 | 0.018679628 | 2.716325748 |
| ENSMUSG00000034993 | Vat1          | 29.80269972 | 30.10864217 | 13.65587589 | 34.99966843 | 1.90E-06    | 2.562974993 |
| ENSMUSG00000035212 | Leprot        | 82.08131332 | 93.70356761 | 32.08864763 | 74.43773856 | 2.98E-05    | 2.319753061 |
| ENSMUSG00000035722 | Abca7         | 0.883723704 | 0.808081273 | 0.294867135 | 0.689021262 | 0.048069456 | 2.336717725 |
| ENSMUSG00000035781 | C030046I01Rik | 13.53592687 | 14.45798385 | 4.403650653 | 9.029827547 | 0.003447455 | 2.05053222  |
| ENSMUSG00000036106 | Prr5          | 9.838620857 | 6.885768916 | 3.478020217 | 6.382225472 | 0.038087265 | 1.835016784 |
| ENSMUSG00000036327 | Qsox2         | 13.83873925 | 10.41727823 | 4.223369802 | 7.249706745 | 0.034951791 | 1.716569253 |
| ENSMUSG00000037188 | Grhl3         | 2.311405708 | 2.237748254 | 0.762114818 | 2.376729999 | 0.000161635 | 3.118598331 |
| ENSMUSG00000037405 | Icam1         | 2.002131022 | 2.050106344 | 1.830687426 | 6.06385062  | 2.15E-06    | 3.31233532  |
| ENSMUSG00000037824 | Tspan14       | 11.80121622 | 12.1199606  | 8.519046309 | 15.58903615 | 0.010564476 | 1.82990391  |
| ENSMUSG00000040010 | Slc7a5        | 30.57988173 | 26.10964037 | 11.91466385 | 19.99953722 | 0.04044095  | 1.678564957 |
| ENSMUSG00000040483 | Xaf1          | 0.327609226 | 0.522092827 | 0.398590547 | 2.092766361 | 9.29E-09    | 5.250416447 |
| ENSMUSG00000040618 | Pck2          | 9.435699732 | 8.526277958 | 3.682535059 | 6.590778441 | 0.030073384 | 1.789739496 |
| ENSMUSG00000040726 | Hesx1         | 0.449661191 | 0.285237723 | 0.040015456 | 0.714736393 | 0.033249806 | 17.86150819 |
| ENSMUSG00000040746 | Rnf167        | 34.76791399 | 37.25891598 | 19.19663154 | 34.34984862 | 0.011125957 | 1.789368543 |
| ENSMUSG00000040857 | Erf           | 15.72542684 | 17.12223625 | 6.494050272 | 11.04235276 | 0.032099038 | 1.700379931 |
| ENSMUSG00000040964 | Arhgef10l     | 0.380100235 | 0.576720193 | 0.437832863 | 1.463387099 | 0.000137069 | 3.342341843 |
| ENSMUSG00000041323 | Ak7           | 0.508376347 | 0.45648226  | 0.265132315 | 0.881892471 | 0.014660988 | 3.326235318 |
| ENSMUSG00000041548 | Hspb8         | 11.02554753 | 11.9382957  | 9.064193243 | 20.93097647 | 0.000157915 | 2.309193539 |
| ENSMUSG00000042312 | S100a13       | 3.178373429 | 3.621380693 | 6.759679714 | 20.03034784 | 5.53E-05    | 2.963209603 |
| ENSMUSG00000042357 | Gjb5          | 0.415619957 | 0.657708005 | 0.423784646 | 3.056352262 | 2.05E-07    | 7.212041055 |
| ENSMUSG00000042367 | Gjb3          | 35.6596344  | 34.7673829  | 9.075075023 | 34.76928803 | 6.85E-12    | 3.831294831 |
| ENSMUSG00000042808 | Gpx2          | 1.31244302  | 1.762833731 | 9.858309259 | 21.72698852 | 0.003470372 | 2.203926449 |
| ENSMUSG00000042842 | Serpnb6b      | 0.076818519 | 0           | 0.276352702 | 1.225258547 | 0.006239573 | 4.433676744 |
| ENSMUSG00000044041 | Krt13         | 0.125961075 | 0.17478027  | 0.125037772 | 0.803094255 | 0.011714083 | 6.422813243 |
| ENSMUSG00000044080 | S100a1        | 12.580423   | 16.32031191 | 11.205167   | 25.01952898 | 0.000837755 | 2.232856411 |
| ENSMUSG00000044734 | Serpnb1a      | 3.459322375 | 3.992947167 | 4.043970788 | 15.00670882 | 4.12E-09    | 3.710884577 |
| ENSMUSG00000045005 | Fzd5          | 5.155066558 | 4.912478397 | 3.498843932 | 10.16219096 | 2.80E-08    | 2.904442484 |
| ENSMUSG00000045827 | Serpnb9       | 0.400794706 | 0.50888391  | 0.60884986  | 1.484187007 | 0.038936514 | 2.43768966  |

|                    |               |             |             |             |             |             |             |
|--------------------|---------------|-------------|-------------|-------------|-------------|-------------|-------------|
| ENSMUSG00000045999 | AY036118      | 127.5681638 | 164.0308142 | 49.91508554 | 92.44246046 | 0.00059009  | 1.851994432 |
| ENSMUSG00000046623 | Gjb4          | 0.039656832 | 0           | 0           | 0.561529506 | 0.007148629 | Inf         |
| ENSMUSG00000046711 | Hmga1         | 22.48260764 | 16.32439266 | 17.27658847 | 62.04972381 | 2.82E-12    | 3.591549565 |
| ENSMUSG00000046805 | Mpeg1         | 0.051514169 | 0.06734789  | 0           | 0.159094049 | 0.018945722 | Inf         |
| ENSMUSG00000046879 | Irgm1         | 2.879222096 | 5.472718914 | 2.401311767 | 4.3327115   | 0.034056781 | 1.804310277 |
| ENSMUSG00000047904 | Sstr2         | 0.271602011 | 0.199325277 | 0.138043321 | 0.841857948 | 0.005045113 | 6.098505466 |
| ENSMUSG00000048232 | Fbxo10        | 2.22232373  | 2.268065864 | 0.903397688 | 1.837978157 | 0.025858064 | 2.034517223 |
| ENSMUSG00000049742 | C330006D17Rik | 6.58705956  | 12.96564493 | 2.811558502 | 8.126894584 | 0.020996594 | 2.890530138 |
| ENSMUSG00000051853 | Arf3          | 60.79824712 | 46.64361557 | 18.97810844 | 41.82796662 | 8.58E-05    | 2.204011361 |
| ENSMUSG00000052180 | Serpinb6c     | 0.156184565 | 0.13590934  | 5.494166041 | 11.96179533 | 0.006457101 | 2.177181257 |
| ENSMUSG00000053113 | Socs3         | 0.120059936 | 0.078637361 | 0.110345573 | 5.837248174 | 3.27E-29    | 52.8997041  |
| ENSMUSG00000053175 | Bcl3          | 0.059519253 | 0.052002004 | 0           | 0.886904469 | 8.43E-08    | Inf         |
| ENSMUSG00000053654 | Krt42         | 1.190830185 | 1.634701956 | 0.301743848 | 1.196783634 | 0.024765926 | 3.966223811 |
| ENSMUSG00000053664 | Uck2          | 537.3005673 | 446.2655217 | 125.786961  | 261.695194  | 0.001619796 | 2.080463602 |
| ENSMUSG00000055629 | B4galnt4      | 9.929559864 | 9.165263094 | 5.302652404 | 10.95394253 | 0.000862319 | 2.065747799 |
| ENSMUSG00000055675 | Kbtbd11       | 0.048928562 | 0.064890593 | 0.159113507 | 0.540614048 | 0.006365608 | 3.397662829 |
| ENSMUSG00000057963 | Itpk1         | 19.11138771 | 16.49288921 | 8.617331237 | 14.51309243 | 0.043097228 | 1.684174836 |
| ENSMUSG00000058625 | Gm17383       | 2.244054522 | 2.650525155 | 1.430646786 | 6.961612228 | 1.35E-06    | 4.86605939  |
| ENSMUSG00000058672 | Tubb2a        | 30.15455359 | 33.63116899 | 10.61926746 | 19.67826541 | 0.013794549 | 1.853071833 |
| ENSMUSG00000059776 | Gm10071       | 2.201850162 | 3.691185163 | 2.984966729 | 8.247752242 | 0.00817272  | 2.763096876 |
| ENSMUSG00000059866 | Tnip2         | 5.842357954 | 5.308093533 | 2.754485261 | 5.252572788 | 0.021336387 | 1.90691628  |
| ENSMUSG00000062683 | Atp5g2        | 6.131815525 | 7.575326573 | 4.580036895 | 12.8944639  | 0.003254398 | 2.815362451 |
| ENSMUSG00000063556 | Gm10132       | 0.99080685  | 1.28053219  | 1.21066054  | 4.691589766 | 0.014127296 | 3.875231422 |
| ENSMUSG00000063586 | Gm5513        | 0.926676526 | 1.760411439 | 0.973165298 | 2.9126731   | 0.023115879 | 2.992989071 |
| ENSMUSG00000064345 | mt-Nd2        | 409.1234549 | 231.2582577 | 522.212792  | 952.5193324 | 0.029300417 | 1.824006127 |
| ENSMUSG00000064350 | mt-Ty         | 101.9363193 | 30.43081038 | 45.0672999  | 276.9400227 | 3.23E-14    | 6.145032503 |
| ENSMUSG00000064363 | mt-Nd4        | 307.8405759 | 118.451784  | 272.2964826 | 616.6803702 | 0.000412206 | 2.264738657 |
| ENSMUSG00000064367 | mt-Nd5        | 1386.856568 | 608.7192209 | 929.1417269 | 3233.433233 | 0.002187901 | 3.480021551 |
| ENSMUSG00000064369 | mt-Te         | 58.91979616 | 32.08074325 | 24.40555009 | 131.6151032 | 2.13E-09    | 5.392834937 |
| ENSMUSG00000064370 | mt-Cytb       | 976.1721334 | 484.8314253 | 858.8159091 | 2057.295346 | 0.006012731 | 2.395502137 |
| ENSMUSG00000064371 | mt-Tt         | 176.1626166 | 245.8768894 | 184.0805185 | 340.3588799 | 0.003397389 | 1.848967412 |
| ENSMUSG00000064694 |               | 179.6042413 | 349.5953131 | 347.3849655 | 623.0750731 | 0.007043902 | 1.793615542 |
| ENSMUSG00000064871 | Snord58b      | 75.49769128 | 94.27166001 | 26.89845798 | 91.64675296 | 5.23E-05    | 3.407137801 |
| ENSMUSG00000065327 |               | 286.8281645 | 574.7200186 | 568.5879962 | 943.0537881 | 0.040310633 | 1.658588986 |
| ENSMUSG00000065883 |               | 33.44991262 | 79.38662874 | 193.1985982 | 321.0491672 | 0.014447643 | 1.661757229 |

|                    |               |             |             |             |             |             |             |
|--------------------|---------------|-------------|-------------|-------------|-------------|-------------|-------------|
| ENSMUSG00000066705 | Fxyd6         | 40.6635638  | 43.88731567 | 22.36736509 | 47.94166817 | 0.000182424 | 2.143375761 |
| ENSMUSG00000068480 | Gm7551        | 2.256146135 | 0.767467404 | 0.210877609 | 1.396978536 | 0.03194433  | 6.624593965 |
| ENSMUSG00000069874 | Irgm2         | 0.109181238 | 0.350268386 | 0.117466281 | 0.839014157 | 1.33E-05    | 7.142595736 |
| ENSMUSG00000071532 | Gm10335       | 2.72230019  | 2.956120529 | 2.652793712 | 7.794113358 | 0.021631023 | 2.93807744  |
| ENSMUSG00000072568 | Fam84b        | 0.175237148 | 0.262406167 | 0.153026281 | 0.649906097 | 0.000944801 | 4.247022756 |
| ENSMUSG00000075014 | Gm10800       | 6.502203195 | 4.847780313 | 18.88524617 | 35.20349308 | 0.010173987 | 1.864073826 |
| ENSMUSG00000076030 |               | 1.377127673 | 1.556643991 | 3.38884673  | 15.80083389 | 0.023101303 | 4.662599152 |
| ENSMUSG00000077506 | Scarna9       | 2979.741589 | 2645.341085 | 1078.927175 | 1685.113514 | 0.030183369 | 1.561841757 |
| ENSMUSG00000077564 |               | 1190.245166 | 1442.857759 | 764.2459731 | 2147.231641 | 1.13E-08    | 2.809608053 |
| ENSMUSG00000077886 | Mir295        | 55.85216332 | 76.68178033 | 65.39679365 | 146.8985341 | 0.009652976 | 2.246265083 |
| ENSMUSG00000078249 | Hmga1-rs1     | 16.85133059 | 12.67312976 | 3.524966219 | 7.25078505  | 0.010605207 | 2.05698001  |
| ENSMUSG00000078532 | Nkain1        | 9.458366115 | 11.28537434 | 5.746373382 | 12.28492304 | 0.001187827 | 2.137856735 |
| ENSMUSG00000078706 | Gm53          | 5.791099211 | 4.890712761 | 3.25866041  | 6.234826844 | 0.006094876 | 1.913309784 |
| ENSMUSG00000078922 | Tgtp1         | 0           | 0.039572914 | 0           | 0.263921234 | 0.00505899  | Inf         |
| ENSMUSG00000079014 | Serpina3i     | 0.024421395 | 0.230266341 | 0.109401644 | 2.123525295 | 4.96E-10    | 19.41036    |
| ENSMUSG00000080775 | Gm6368        | 9.700938219 | 8.94248004  | 5.653727926 | 10.16733884 | 0.029484886 | 1.798342434 |
| ENSMUSG00000080851 | Gm12094       | 0.773639988 | 1.226946237 | 0.805682546 | 3.597319046 | 0.048144237 | 4.464933568 |
| ENSMUSG00000081043 | Gm11512       | 4.006029322 | 2.284770497 | 2.222756909 | 9.279252858 | 2.91E-05    | 4.174659326 |
| ENSMUSG00000081159 | Gm6023        | 32.97412003 | 25.93266981 | 29.27716289 | 54.01373096 | 0.009938844 | 1.844910013 |
| ENSMUSG00000081783 | Gm15599       | 0.630886999 | 1.417306241 | 0.137208195 | 1.556546312 | 0.006457101 | 11.34441217 |
| ENSMUSG00000082179 | Gm11407       | 1.363597618 | 0.529270609 | 0.731382063 | 5.675620214 | 7.03E-09    | 7.760130448 |
| ENSMUSG00000082390 | Gm12136       | 0.821264725 | 1.522141439 | 0.88003135  | 2.751287113 | 0.022330944 | 3.126351254 |
| ENSMUSG00000082600 | Gm9673        | 0.336226509 | 0.588308326 | 0.136154098 | 1.247587707 | 0.033732648 | 9.163056584 |
| ENSMUSG00000082896 | Gm5844        | 5.139368965 | 7.476276916 | 6.213069868 | 15.40183182 | 2.86E-05    | 2.478940709 |
| ENSMUSG00000083076 | Gm11408       | 1.523717356 | 0.359645668 | 0.789460364 | 3.381693052 | 0.019258539 | 4.28355014  |
| ENSMUSG00000083219 | Gm11410       | 0.31427442  | 0.136086397 | 0.292239836 | 1.340330444 | 0.035306178 | 4.586405679 |
| ENSMUSG00000083320 | Gm13935       | 3.766771613 | 8.678615511 | 9.421867113 | 17.95364981 | 0.029072349 | 1.905529933 |
| ENSMUSG00000083431 | Gm13437       | 0.792154802 | 0.910833999 | 1.296757537 | 3.696964415 | 0.003220505 | 2.850929576 |
| ENSMUSG00000083563 | Gm13340       | 7.653683476 | 5.885841071 | 5.802762198 | 21.76508711 | 6.68E-10    | 3.750814935 |
| ENSMUSG00000083863 | Gm13341       | 4.805530437 | 3.553985526 | 8.819310512 | 18.02839908 | 0.029765737 | 2.044195979 |
| ENSMUSG00000083982 | Gm14650       | 0.380204143 | 0.519530475 | 0.495350375 | 2.012367361 | 0.034314218 | 4.062513045 |
| ENSMUSG00000086219 | 2410137F16Rik | 9.122393523 | 8.49650059  | 2.643714262 | 4.840218522 | 0.02689063  | 1.830840266 |
| ENSMUSG00000086967 | 4930566F21Rik | 28.69308696 | 33.66613906 | 14.82493081 | 25.12311541 | 0.030726498 | 1.694653131 |
| ENSMUSG00000087943 |               | 102.0897524 | 235.191834  | 170.4513548 | 317.0848615 | 0.009476443 | 1.860266009 |
| ENSMUSG00000088144 |               | 6.384354898 | 5.320091852 | 7.651208333 | 25.79470661 | 0.00642679  | 3.371324566 |

|                    |               |             |             |             |             |             |             |
|--------------------|---------------|-------------|-------------|-------------|-------------|-------------|-------------|
| ENSMUSG00000088609 |               | 68.09528053 | 152.2739969 | 59.40278882 | 156.8516618 | 0.00039674  | 2.640476397 |
| ENSMUSG00000088835 |               | 761.8268774 | 775.5749357 | 163.6789942 | 660.1411493 | 5.14E-14    | 4.033145197 |
| ENSMUSG00000088948 |               | 58.93301252 | 105.4229955 | 125.294102  | 206.5934664 | 0.021261178 | 1.648868247 |
| ENSMUSG00000089993 | Gm5822        | 4.936471712 | 9.030419907 | 5.954066235 | 11.83187707 | 0.014127296 | 1.987192718 |
| ENSMUSG00000090266 | 1110005A03Rik | 10.49891951 | 8.444418564 | 6.500211787 | 11.231462   | 0.036067851 | 1.727860933 |
| ENSMUSG00000090862 | Rps13         | 21.7584336  | 28.9962867  | 36.15864523 | 64.43445515 | 0.025094762 | 1.781993068 |
| ENSMUSG00000091021 | Gm17300       | 8.868360311 | 8.943767976 | 3.10066994  | 6.128464087 | 0.010403992 | 1.976496759 |
| ENSMUSG00000091732 | Gm17541       | 3.788735745 | 3.18619676  | 1.013859329 | 5.192232636 | 0.001533708 | 5.121255471 |
| ENSMUSG00000092019 | Gm4027        | 8.189620688 | 8.45482412  | 7.140004298 | 15.7720395  | 0.003447455 | 2.208967788 |
| ENSMUSG00000092267 | Gm20417       | 7.463744604 | 6.244446512 | 1.96348456  | 9.279432569 | 3.22E-05    | 4.726002312 |
| ENSMUSG00000092274 | Neat1         | 0.923092842 | 0.787815063 | 0.83661326  | 1.461929009 | 0.023890687 | 1.747437052 |
| ENSMUSG00000092509 | Gm20394       | 0.544653311 | 0.561431924 | 0           | 0.693333218 | 0.024859074 | Inf         |
| ENSMUSG00000092702 |               | 24.01910391 | 74.99113662 | 50.84026622 | 91.81898614 | 0.017964896 | 1.806028823 |
| ENSMUSG00000092998 | Mir5099       | 102.24795   | 119.0382822 | 17.02468028 | 95.09759364 | 1.31E-08    | 5.585866639 |
| ENSMUSG00000096449 |               | 3.714320738 | 1.771589354 | 2.353040128 | 16.2214583  | 4.60E-10    | 6.893829864 |
| ENSMUSG00000096887 |               | 64.40309421 | 150.2692786 | 264.8496848 | 594.4436503 | 4.57E-05    | 2.244456703 |

List of genes downregulated (p-value < 0.05) after LIF treatment (1h) in Stat3 wild-type cells cultured in 2i

| ENSEMBL_ID         | GENE SYMBOL | Stat3_null_2i (FPKM) | Stat3_null_2i+LIF_1h | Stat3_wt_2i (FPKM) | Stat3_wt_2i+LIF_1h | Adj_pvalue  | Fold Change |
|--------------------|-------------|----------------------|----------------------|--------------------|--------------------|-------------|-------------|
| ENSMUSG00000000581 | C1d         | 7.225479407          | 10.09998057          | 32.2041376         | 19.29897025        | 0.024448347 | 0.599269898 |
| ENSMUSG00000000730 | Dnmt3l      | 59.22538792          | 57.49975589          | 42.62447578        | 24.03194133        | 0.007298174 | 0.563806144 |
| ENSMUSG00000000731 | Aire        | 1.835280605          | 1.657303423          | 2.569569126        | 1.2780803          | 0.025094762 | 0.4973909   |
| ENSMUSG00000000740 | Rpl13       | 85.76464161          | 80.69665781          | 339.691723         | 132.8148784        | 2.09E-07    | 0.390986501 |
| ENSMUSG00000001289 | Pfdn5       | 78.94110527          | 69.80522024          | 181.0504781        | 87.63501445        | 3.22E-05    | 0.48403636  |
| ENSMUSG00000001305 | Rrp15       | 26.26051893          | 24.55927794          | 25.46363078        | 14.99695835        | 0.020754082 | 0.588956009 |
| ENSMUSG00000001604 | Tcea3       | 8.448042052          | 7.102230225          | 12.68398299        | 5.568898349        | 0.000318749 | 0.439049655 |
| ENSMUSG00000003429 | Rps11       | 277.7160315          | 226.8947608          | 734.8107901        | 398.205513         | 0.002639846 | 0.541915713 |
| ENSMUSG00000003955 | Fam162a     | 54.27593182          | 63.96431244          | 201.8372352        | 100.5716543        | 0.000119078 | 0.498280975 |
| ENSMUSG00000004771 | Rab11a      | 14.62104731          | 15.52844872          | 43.29608428        | 24.68102349        | 0.005771204 | 0.570052094 |
| ENSMUSG00000005947 | Itgae       | 0.256918576          | 0.382910369          | 1.608218809        | 0.747726887        | 0.032326086 | 0.464941016 |
| ENSMUSG00000006717 | Acot13      | 33.30260464          | 31.43156473          | 68.38883788        | 38.74006064        | 0.003478371 | 0.566467597 |
| ENSMUSG00000008475 | Arpc5       | 40.76720492          | 50.94066389          | 64.19621206        | 37.913573          | 0.01485906  | 0.590588943 |

|                    |               |             |             |             |             |             |             |
|--------------------|---------------|-------------|-------------|-------------|-------------|-------------|-------------|
| ENSMUSG00000008683 | Rps15a        | 53.73819492 | 63.0726902  | 428.4205981 | 165.4364361 | 7.87E-06    | 0.386154253 |
| ENSMUSG00000009013 | Dynll1        | 39.40542578 | 43.46343767 | 80.99557033 | 48.1834757  | 0.018604734 | 0.594890258 |
| ENSMUSG00000009734 | Pou6f2        | 0.026032154 | 0           | 0.280400719 | 0           | 1.16E-07    | 0           |
| ENSMUSG00000009927 | Rps25         | 435.5536401 | 459.9467551 | 1594.428917 | 911.1590805 | 0.029765737 | 0.571464222 |
| ENSMUSG00000010406 | Mrpl52        | 54.38384958 | 39.15431672 | 110.8791677 | 60.69532249 | 0.002336916 | 0.547400596 |
| ENSMUSG00000014226 | Cacybp        | 175.3812312 | 207.6757019 | 645.1611106 | 305.1772677 | 0.000535693 | 0.473024897 |
| ENSMUSG00000014294 | Ndufa2        | 86.0506804  | 95.98967728 | 263.7659169 | 124.4469014 | 1.17E-05    | 0.47180812  |
| ENSMUSG00000014846 | Tppp3         | 1.084416497 | 1.209478027 | 1.093606633 | 0.333640196 | 0.02792998  | 0.305082455 |
| ENSMUSG00000014980 | Tsen15        | 3.629529018 | 4.326987496 | 10.06186951 | 5.057649298 | 0.004176983 | 0.502655028 |
| ENSMUSG00000015672 | Mrpl32        | 23.67558786 | 26.37663061 | 80.60370254 | 45.63692354 | 0.005207427 | 0.566188923 |
| ENSMUSG00000015980 | Lrrc27        | 1.160075587 | 1.027756196 | 1.734736432 | 0.72275575  | 0.004253858 | 0.416637212 |
| ENSMUSG00000016252 | Atp5e         | 37.93713333 | 46.29112257 | 166.7081093 | 88.13571066 | 0.000987086 | 0.528682804 |
| ENSMUSG00000016503 | Gtf3a         | 8.128836946 | 7.720126721 | 14.36230726 | 8.198213483 | 0.011982948 | 0.570814517 |
| ENSMUSG00000018196 | Glxr2         | 5.146510019 | 4.912856711 | 9.216718685 | 5.422949432 | 0.014127296 | 0.588381789 |
| ENSMUSG00000018923 | Med11         | 7.799206193 | 7.755686722 | 21.55930543 | 11.98070601 | 0.017480394 | 0.555709276 |
| ENSMUSG00000020059 | Sycp3         | 7.406137319 | 8.161791098 | 20.28927847 | 11.37969546 | 0.019992261 | 0.560872358 |
| ENSMUSG00000020180 | Snrpd3        | 138.6286798 | 126.2217569 | 236.4558611 | 147.3828264 | 0.034951791 | 0.623299527 |
| ENSMUSG00000020267 | Hint1         | 250.7464933 | 295.2842959 | 727.8891278 | 394.0764915 | 0.003311349 | 0.541396315 |
| ENSMUSG00000020386 | Sar1b         | 33.91634353 | 44.25728535 | 88.78166638 | 52.40921855 | 0.014546311 | 0.590315779 |
| ENSMUSG00000020462 | Ccdc104       | 16.44271128 | 19.14011254 | 33.40459413 | 19.85834899 | 0.015551614 | 0.594479577 |
| ENSMUSG00000020477 | Mrps24        | 26.75306672 | 31.23209302 | 57.55444508 | 32.9762556  | 0.006457101 | 0.572957581 |
| ENSMUSG00000020660 | Pomc          | 0.428593491 | 0.679658018 | 1.055971706 | 0.163024441 | 0.021336387 | 0.154383342 |
| ENSMUSG00000020857 | Nme2          | 23.34170478 | 30.76448572 | 68.07206503 | 27.41299515 | 1.14E-07    | 0.402705502 |
| ENSMUSG00000021024 | Psma6         | 210.667473  | 221.140142  | 354.3131218 | 214.0828374 | 0.034683025 | 0.604219331 |
| ENSMUSG00000021290 | 2010107E04Rik | 57.41427597 | 67.9169097  | 220.669398  | 136.1718624 | 0.030626652 | 0.617085394 |
| ENSMUSG00000021414 | 1700026J04Rik | 0.036547377 | 0.053956151 | 0.35494631  | 0.027565971 | 0.018602005 | 0.077662369 |
| ENSMUSG00000021537 | Cetn3         | 74.36088048 | 86.03515891 | 154.0827054 | 85.8797637  | 0.004841643 | 0.557361474 |
| ENSMUSG00000021967 | Mrp63         | 3.493908377 | 3.343670995 | 6.14278006  | 3.489871178 | 0.038447657 | 0.568125693 |
| ENSMUSG00000022013 | Dnajc15       | 22.3319968  | 26.38274374 | 108.4237    | 61.51215762 | 0.005768644 | 0.56733129  |
| ENSMUSG00000022205 | Sub1          | 63.1244744  | 74.64259662 | 150.7407107 | 68.24706008 | 4.45E-05    | 0.452744715 |
| ENSMUSG00000022677 | 0610037P05Rik | 20.54272072 | 24.70806668 | 66.2625673  | 38.95539367 | 0.014546311 | 0.587894422 |
| ENSMUSG00000022773 | Ypel1         | 0.812622625 | 0.749668121 | 1.76368093  | 0.781938298 | 0.007343331 | 0.443355873 |
| ENSMUSG00000023089 | Ndufa5        | 4.249421141 | 3.475959411 | 17.46648917 | 9.263341785 | 0.011356424 | 0.530349385 |
| ENSMUSG00000023919 | Cenpq         | 15.1009211  | 16.47668044 | 28.99144832 | 15.91667707 | 0.002740385 | 0.549012829 |
| ENSMUSG00000024067 | Dpy30         | 172.6080036 | 184.0462045 | 447.8470888 | 264.7526457 | 0.021147014 | 0.591167504 |

|                    |               |             |             |             |             |             |             |
|--------------------|---------------|-------------|-------------|-------------|-------------|-------------|-------------|
| ENSMUSG00000024346 | Pfdn1         | 62.61554287 | 72.15360043 | 128.7175312 | 75.74221809 | 0.008951664 | 0.588437468 |
| ENSMUSG00000024538 | Ppic          | 68.92985805 | 68.98533034 | 165.6112322 | 89.11503121 | 0.001505877 | 0.538097749 |
| ENSMUSG00000024608 | Rps14         | 830.7548718 | 726.21578   | 691.8202744 | 382.3665515 | 0.034056781 | 0.552696366 |
| ENSMUSG00000024646 | Cyb5          | 17.80384496 | 19.58219107 | 53.19581086 | 33.31900241 | 0.034056781 | 0.626346358 |
| ENSMUSG00000024661 | Fth1          | 155.3421566 | 135.8318378 | 213.382244  | 127.1477596 | 0.017978292 | 0.595868509 |
| ENSMUSG00000025260 | Hsd17b10      | 18.55005382 | 18.38854447 | 40.88460411 | 24.62383111 | 0.024972824 | 0.602276374 |
| ENSMUSG00000025290 | Rps24         | 1242.786736 | 1175.877869 | 5792.031351 | 2597.154922 | 0.004393128 | 0.448401392 |
| ENSMUSG00000025362 | Rps26         | 860.8301761 | 891.7021462 | 3470.541591 | 1947.258625 | 0.014898611 | 0.56108206  |
| ENSMUSG00000025794 | Rpl14         | 24.18426488 | 19.63335632 | 109.7165449 | 35.29517867 | 3.76E-12    | 0.321694223 |
| ENSMUSG00000025894 | Aasdhppt      | 5.190558865 | 6.602179753 | 16.31352602 | 9.199219435 | 0.012866132 | 0.563901355 |
| ENSMUSG00000025978 | Rftn2         | 0.563922028 | 0.709642094 | 1.208801042 | 0.596982379 | 0.041096332 | 0.493863224 |
| ENSMUSG00000026154 | 1110058L19Rik | 9.271374561 | 16.24486407 | 26.36381463 | 14.36683798 | 0.020996594 | 0.544945342 |
| ENSMUSG00000026429 | Ube2t         | 6.100179704 | 6.536640998 | 22.0126307  | 12.34355209 | 0.014589488 | 0.560748611 |
| ENSMUSG00000026688 | Mgst3         | 7.343013423 | 10.54515906 | 23.49077756 | 11.93042744 | 0.002822955 | 0.507877077 |
| ENSMUSG00000027108 | Ola1          | 19.56932378 | 19.95624657 | 45.97296636 | 28.9766973  | 0.039169447 | 0.630298621 |
| ENSMUSG00000027166 | Dnajc24       | 15.9761821  | 21.16520874 | 28.41571317 | 16.35468598 | 0.026214575 | 0.575550783 |
| ENSMUSG00000027239 | Mdk           | 41.19878157 | 41.39925125 | 24.97408513 | 11.97025993 | 0.000200191 | 0.479307245 |
| ENSMUSG00000027679 | Dnajc19       | 10.08163538 | 11.8353721  | 27.07701874 | 17.25086584 | 0.04011114  | 0.63710359  |
| ENSMUSG00000027835 | Pdcd10        | 10.19540492 | 14.49681234 | 50.88918731 | 27.84622688 | 0.002435556 | 0.547193389 |
| ENSMUSG00000028145 | Them4         | 1.035476656 | 0.950680684 | 2.253666969 | 1.092433777 | 0.018756316 | 0.484736117 |
| ENSMUSG00000028261 | Ndufaf4       | 3.917617724 | 4.412011215 | 11.01184193 | 6.351845609 | 0.0173346   | 0.576819541 |
| ENSMUSG00000028691 | Prdx1         | 201.8029408 | 252.447072  | 556.9097162 | 314.4215889 | 0.044709859 | 0.564582696 |
| ENSMUSG00000028790 | Khdrbs1       | 4.881234116 | 6.421263499 | 12.44233589 | 7.652053105 | 0.032574588 | 0.615001329 |
| ENSMUSG00000028832 | Stmn1         | 0.902886363 | 1.528965358 | 3.550218262 | 1.743215387 | 0.033637424 | 0.491016399 |
| ENSMUSG00000028936 | Rpl22         | 205.3043173 | 256.0115128 | 631.1827337 | 342.6542669 | 0.022366456 | 0.54287649  |
| ENSMUSG00000029142 | Mrpl33        | 5.481968834 | 6.549917346 | 12.84757762 | 7.133803209 | 0.003170688 | 0.555264457 |
| ENSMUSG00000029235 | Pdcl2         | 9.180175352 | 11.9673395  | 35.94089384 | 15.27448758 | 5.85E-06    | 0.424989085 |
| ENSMUSG00000029484 | Anxa3         | 2.188366419 | 2.447006069 | 3.501163271 | 1.319714322 | 0.003536068 | 0.376935955 |
| ENSMUSG00000029563 | Foxp2         | 0           | 0.004979288 | 0.039465509 | 0           | 0.034898996 | 0           |
| ENSMUSG00000029616 | Erp29         | 8.858570836 | 9.971572382 | 9.379820141 | 5.758523055 | 0.036800866 | 0.61392681  |
| ENSMUSG00000029784 | 1700025E21Rik | 0.166991201 | 0.301945481 | 0.731758848 | 0.145163655 | 0.015857937 | 0.198376357 |
| ENSMUSG00000029911 | Ssbp1         | 29.008137   | 28.50904206 | 42.51575721 | 26.55377406 | 0.046643654 | 0.624563122 |
| ENSMUSG00000030122 | Ptms          | 202.4819971 | 153.2513593 | 82.24509674 | 34.92912966 | 1.54E-05    | 0.424695587 |
| ENSMUSG00000030613 | Ccdc90b       | 9.187892733 | 10.86774399 | 25.7092745  | 13.93224733 | 0.003311349 | 0.541915227 |
| ENSMUSG00000031590 | Frg1          | 39.22193599 | 34.65851544 | 55.34178366 | 30.15557123 | 0.005761869 | 0.544896988 |



|                    |               |             |             |             |             |             |             |
|--------------------|---------------|-------------|-------------|-------------|-------------|-------------|-------------|
| ENSMUSG00000031917 | Nip7          | 23.35508471 | 25.36748391 | 54.30924464 | 31.30001138 | 0.009440139 | 0.576329345 |
| ENSMUSG00000032221 | Mns1          | 9.287004063 | 6.414174456 | 6.708975337 | 3.612638682 | 0.032249841 | 0.538478456 |
| ENSMUSG00000032330 | Cox7a2        | 180.9502426 | 213.8796518 | 538.9331886 | 340.2847111 | 0.048410573 | 0.63140426  |
| ENSMUSG00000032397 | Tipin         | 107.3780152 | 107.6460687 | 227.4188581 | 126.9249505 | 0.004250539 | 0.55811093  |
| ENSMUSG00000032999 | Nlrp4f        | 13.77303411 | 16.23168121 | 20.20318925 | 12.50751739 | 0.046488114 | 0.619086285 |
| ENSMUSG00000033752 | Mnd1          | 21.50923797 | 21.40887867 | 25.03092595 | 13.42997848 | 0.01152182  | 0.536535425 |
| ENSMUSG00000033931 | Rbm34         | 13.25834425 | 12.87324856 | 18.41292241 | 11.13434131 | 0.035306178 | 0.604702559 |
| ENSMUSG00000034192 | Lsm3          | 92.35648085 | 110.9621833 | 161.1875807 | 99.54162831 | 0.035086194 | 0.617551476 |
| ENSMUSG00000034932 | Mrpl54        | 14.35487055 | 16.980475   | 33.27517082 | 20.27546712 | 0.042877446 | 0.609327214 |
| ENSMUSG00000035202 | Lars2         | 116.0965569 | 140.5635118 | 364.438191  | 148.1685845 | 5.53E-05    | 0.406567117 |
| ENSMUSG00000035235 | Trim13        | 34.58789731 | 38.72138491 | 85.35757653 | 53.03135513 | 0.035596043 | 0.621284686 |
| ENSMUSG00000035443 | Thyn1         | 22.30609767 | 26.08406555 | 70.23033959 | 42.52343956 | 0.025098452 | 0.605485319 |
| ENSMUSG00000035637 | Grhpr         | 3.524490829 | 3.403720994 | 4.426130839 | 1.984392092 | 0.011714083 | 0.448335615 |
| ENSMUSG00000036223 | Ska1          | 8.422812126 | 10.79970832 | 29.73361369 | 15.77716184 | 0.001006047 | 0.530617032 |
| ENSMUSG00000037361 | 0610009D07Rik | 45.52541201 | 55.89441988 | 257.9354885 | 128.9366035 | 0.000100094 | 0.499879269 |
| ENSMUSG00000038510 | Rpf2          | 23.19988571 | 27.48754055 | 78.66490789 | 47.36599244 | 0.019258539 | 0.602123535 |
| ENSMUSG00000038543 | BC028528      | 14.3907274  | 12.40904192 | 8.039271603 | 4.008239971 | 0.013794549 | 0.49858248  |
| ENSMUSG00000038722 | Bud31         | 26.89691963 | 38.67570416 | 76.40002003 | 46.29371337 | 0.027968508 | 0.605938498 |
| ENSMUSG00000038793 | Lefty1        | 97.01823153 | 123.7768496 | 70.19861953 | 31.08417224 | 3.18E-06    | 0.442803184 |
| ENSMUSG00000039001 | Rps21         | 205.5238058 | 266.1069423 | 636.0294593 | 391.0012052 | 0.032260694 | 0.614753294 |
| ENSMUSG00000039099 | Wdr93         | 3.467191845 | 4.201728323 | 8.186746166 | 3.438196373 | 6.16E-05    | 0.419971049 |
| ENSMUSG00000039221 | Rpl22l1       | 35.43421389 | 41.80770536 | 303.8359274 | 136.0840967 | 1.79E-06    | 0.447886785 |
| ENSMUSG00000039246 | Lyplal1       | 15.99041077 | 18.48628793 | 41.51430239 | 25.05672856 | 0.025094762 | 0.60356858  |
| ENSMUSG00000039323 | Igfbp2        | 197.9006202 | 256.1382734 | 173.2185638 | 97.69843421 | 0.014560972 | 0.564018267 |
| ENSMUSG00000039697 | Ncoa7         | 0.831440484 | 0.739981875 | 1.517350776 | 0.769518961 | 0.048418844 | 0.507146385 |
| ENSMUSG00000039737 | Prkrip1       | 6.102386376 | 7.211736977 | 7.162281491 | 3.991036313 | 0.013163269 | 0.557229748 |
| ENSMUSG00000040269 | Mrps28        | 36.13213272 | 47.2621709  | 58.99425373 | 31.47330995 | 0.002559688 | 0.533497891 |
| ENSMUSG00000040952 | Rps19         | 63.90244701 | 65.96729363 | 208.9650784 | 82.59259879 | 2.19E-07    | 0.39524594  |
| ENSMUSG00000041378 | Cldn5         | 3.047918298 | 2.289813275 | 2.149003487 | 0.715561844 | 0.010566664 | 0.332973794 |
| ENSMUSG00000041453 | Rpl21         | 60.1248407  | 62.32701907 | 128.9399647 | 65.53143429 | 0.000412206 | 0.508232141 |
| ENSMUSG00000041840 | Haus1         | 85.51459448 | 89.28440382 | 169.3513968 | 93.50616322 | 0.00255921  | 0.552142852 |
| ENSMUSG00000042541 | Shfm1         | 365.6036634 | 355.5264865 | 580.2375708 | 346.7857101 | 0.016623354 | 0.597661592 |
| ENSMUSG00000044141 | E130201H02Rik | 0.535510739 | 0.638333365 | 2.178578134 | 0.573523665 | 0.018648086 | 0.263255954 |
| ENSMUSG00000044609 | Gm9294        | 4.941988464 | 8.955797181 | 37.65806237 | 21.80026575 | 0.031378833 | 0.578900357 |
| ENSMUSG00000044627 | Swi5          | 38.81829799 | 40.15373444 | 99.01197244 | 59.33826348 | 0.013794549 | 0.599303923 |

|                    |               |             |             |             |             |             |             |
|--------------------|---------------|-------------|-------------|-------------|-------------|-------------|-------------|
| ENSMUSG00000045394 | Epcam         | 26.50275352 | 27.51075603 | 44.84941846 | 26.81198836 | 0.018342884 | 0.597822431 |
| ENSMUSG00000045799 | Gm9800        | 304.5459112 | 247.8053348 | 232.2786386 | 100.2511307 | 2.98E-05    | 0.43159858  |
| ENSMUSG00000046402 | Rbp1          | 15.0240873  | 16.08938372 | 11.88894157 | 5.347484211 | 3.44E-05    | 0.449786398 |
| ENSMUSG00000046721 | Rpl14-ps1     | 3.821105455 | 2.875039327 | 11.06764737 | 4.90992047  | 0.006094876 | 0.443628199 |
| ENSMUSG00000046909 | 1110002N22Rik | 20.65106599 | 25.69106393 | 53.9526132  | 30.91414881 | 0.011765255 | 0.572987053 |
| ENSMUSG00000047635 | 2810006K23Rik | 3.638594645 | 3.364274872 | 7.325897492 | 4.038587432 | 0.015150001 | 0.551275449 |
| ENSMUSG00000047675 | Rps8          | 220.3305542 | 215.1542478 | 730.6269202 | 367.4094681 | 0.001543426 | 0.50286878  |
| ENSMUSG00000047676 | Rpsa-ps10     | 137.2266857 | 153.4478091 | 100.280501  | 58.97926275 | 0.006174008 | 0.588142881 |
| ENSMUSG00000047844 | Bex4          | 104.8414167 | 135.2007533 | 186.6667692 | 102.1356425 | 0.004440571 | 0.547154927 |
| ENSMUSG00000048709 | Gm8666        | 29.61228877 | 27.29888431 | 29.6720945  | 16.03638661 | 0.045713572 | 0.540453476 |
| ENSMUSG00000048982 | Gphb5         | 0           | 0           | 0.375952389 | 0           | 0.019763184 | 0           |
| ENSMUSG00000049751 | Rpl36al       | 42.6595181  | 41.98722983 | 86.36402239 | 50.86761094 | 0.010834174 | 0.588990757 |
| ENSMUSG00000049760 | 2410015M20Rik | 148.7970219 | 100.2257804 | 101.3030102 | 53.20659567 | 0.000862819 | 0.525222257 |
| ENSMUSG00000050621 | Gm9846        | 5.08010848  | 9.733679848 | 35.20745369 | 17.0838261  | 0.009726078 | 0.485233219 |
| ENSMUSG00000050623 | 1700019N12Rik | 0.931375588 | 0.870202361 | 5.236121555 | 2.283842184 | 0.040504802 | 0.436170582 |
| ENSMUSG00000050856 | Atp5k         | 54.74428501 | 36.33864851 | 78.84712808 | 41.59767397 | 0.002520846 | 0.527573736 |
| ENSMUSG00000050957 | Insl6         | 1.879218923 | 2.152051957 | 2.695350385 | 0.835277546 | 0.026948407 | 0.309895719 |
| ENSMUSG00000051355 | Commd1        | 3.803330507 | 4.440332622 | 9.972910952 | 6.257912665 | 0.045755114 | 0.62749108  |
| ENSMUSG00000051627 | Hist1h1e      | 41.96974935 | 65.74211372 | 101.5720819 | 36.13141393 | 1.87E-09    | 0.3557219   |
| ENSMUSG00000052013 | Btla          | 2.620586473 | 2.589231468 | 9.013556748 | 5.226658092 | 0.028465345 | 0.579866332 |
| ENSMUSG00000052033 | Pfdn4         | 9.071838964 | 11.55602068 | 30.76135132 | 16.28186221 | 0.002072703 | 0.529296065 |
| ENSMUSG00000052144 | Ppp4r2        | 14.75662306 | 16.02778272 | 27.61297958 | 16.25836846 | 0.01863589  | 0.588794426 |
| ENSMUSG00000052146 | Rps10         | 26.89873827 | 29.9508187  | 70.60469865 | 39.7394509  | 0.004563281 | 0.562844282 |
| ENSMUSG00000052565 | Hist1h1d      | 41.13269094 | 61.16736231 | 60.73932849 | 35.33808472 | 0.021305458 | 0.581799068 |
| ENSMUSG00000053173 | Rpl18-ps2     | 3.085735362 | 4.294436399 | 7.727109402 | 3.347032421 | 0.046488114 | 0.433154527 |
| ENSMUSG00000053916 | Nanp          | 0.225114843 | 0.154391399 | 1.950079318 | 0.505477582 | 0.002922576 | 0.259208729 |
| ENSMUSG00000054091 | 1810037I17Rik | 62.62365694 | 91.27288557 | 125.3648475 | 69.78268209 | 0.006399753 | 0.556636756 |
| ENSMUSG00000054626 | Xlr           | 0.049158834 | 0.070776644 | 1.758274513 | 0.531978106 | 0.002158074 | 0.302556911 |
| ENSMUSG00000054727 | 1700013H16Rik | 0.636182124 | 0.67647332  | 8.192840449 | 3.786206848 | 0.011765255 | 0.462136041 |
| ENSMUSG00000055447 | Cd47          | 1.996540857 | 1.461588861 | 2.680746829 | 1.509268039 | 0.048069456 | 0.563002826 |
| ENSMUSG00000055555 | 4930502E18Rik | 2.478551635 | 2.713364935 | 21.13553211 | 9.123167415 | 4.53E-05    | 0.431650709 |
| ENSMUSG00000055963 | Gm11818       | 0.5930364   | 0.914708    | 1.686685588 | 0.595610555 | 0.047516841 | 0.353124826 |
| ENSMUSG00000056300 | Gm13247       | 26.19339646 | 30.2377671  | 161.5677448 | 98.21297787 | 0.030493751 | 0.607874907 |
| ENSMUSG00000056436 | Cyct          | 130.2153557 | 114.2126034 | 278.4166446 | 167.9810609 | 0.015940882 | 0.603344175 |
| ENSMUSG00000057130 | Txnl4a        | 7.281771545 | 5.93498871  | 15.322734   | 8.249670206 | 0.004097237 | 0.538394141 |

|                    |               |             |             |             |             |             |             |
|--------------------|---------------|-------------|-------------|-------------|-------------|-------------|-------------|
| ENSMUSG00000057278 | Snrpg         | 143.9947736 | 132.2058822 | 482.6032493 | 275.3443696 | 0.004253858 | 0.570539817 |
| ENSMUSG00000058064 | Gm10036       | 165.7992828 | 203.5476614 | 544.5720478 | 250.7270777 | 4.04E-06    | 0.460411214 |
| ENSMUSG00000058407 | Txndc9        | 13.78076744 | 16.22991949 | 25.44697973 | 15.46395415 | 0.027968508 | 0.607693106 |
| ENSMUSG00000058773 | Hist1h1b      | 142.1878119 | 182.8261763 | 336.9034669 | 148.7863678 | 1.39E-05    | 0.441629079 |
| ENSMUSG00000059058 | Gm15431       | 51.7931413  | 71.50417339 | 70.63640864 | 21.79314598 | 2.79E-09    | 0.30852568  |
| ENSMUSG00000059159 | Gm8129        | 5.692254944 | 7.004972419 | 55.86775887 | 26.97408361 | 0.004681469 | 0.48282022  |
| ENSMUSG00000059751 | Gm9000        | 189.2019416 | 321.7296399 | 953.648139  | 422.1248149 | 2.72E-05    | 0.4426421   |
| ENSMUSG00000060152 | Pop5          | 8.533447345 | 8.099489671 | 16.10901629 | 9.450786916 | 0.023101303 | 0.586676849 |
| ENSMUSG00000060288 | Ppih          | 10.90558095 | 12.71200155 | 31.06321102 | 18.39696397 | 0.01485906  | 0.592242829 |
| ENSMUSG00000060438 | Rps10-ps1     | 7.374851686 | 9.932602975 | 15.26282748 | 6.057861266 | 0.000773919 | 0.396902951 |
| ENSMUSG00000060636 | Rpl35a        | 99.52061966 | 96.20438617 | 269.3823064 | 108.2620512 | 1.19E-06    | 0.401889985 |
| ENSMUSG00000060730 | Gm10086       | 40.12889607 | 40.81063657 | 75.80879338 | 29.53023278 | 1.39E-06    | 0.389535718 |
| ENSMUSG00000060743 | H3f3a         | 18.16695343 | 33.28923489 | 53.02874533 | 28.56885752 | 0.002068171 | 0.538742852 |
| ENSMUSG00000060938 | Rpl26         | 508.7513825 | 529.257345  | 2099.506418 | 802.9812167 | 1.95E-05    | 0.382461902 |
| ENSMUSG00000060981 | Hist1h4h      | 292.2996011 | 463.4248382 | 728.8475343 | 393.9958513 | 0.003140217 | 0.540573759 |
| ENSMUSG00000061315 | Naca          | 12.87039754 | 11.27838207 | 13.83523649 | 8.335399177 | 0.01688036  | 0.602476089 |
| ENSMUSG00000061482 | Hist1h4d      | 856.5900687 | 1068.133324 | 2110.665466 | 1244.524571 | 0.036067851 | 0.589636108 |
| ENSMUSG00000061669 | Gm6404        | 3.41887165  | 4.143917736 | 10.72732224 | 2.568449542 | 0.000209602 | 0.239430632 |
| ENSMUSG00000062353 | Gm15772       | 10.51958124 | 12.60618139 | 86.19870588 | 27.99394642 | 1.74E-09    | 0.324760635 |
| ENSMUSG00000062691 | 1110001A16Rik | 31.77742648 | 35.57252359 | 59.27289996 | 31.46796445 | 0.001164758 | 0.530899694 |
| ENSMUSG00000063021 | Hist1h2ak     | 58.34552396 | 85.14672258 | 138.2237545 | 78.23647673 | 0.007903584 | 0.566013251 |
| ENSMUSG00000063172 | Hspb11        | 1.199346847 | 1.379677604 | 5.480314125 | 2.550518221 | 0.007105439 | 0.465396355 |
| ENSMUSG00000063179 | Pstk          | 3.844781035 | 4.267747112 | 12.45293772 | 7.326000382 | 0.044785197 | 0.588294951 |
| ENSMUSG00000063412 | Gm10131       | 5.222874956 | 6.067250238 | 8.012212763 | 2.962166485 | 0.002370734 | 0.369706419 |
| ENSMUSG00000063543 | Gm5616        | 2.167810112 | 3.178374955 | 3.26304473  | 0.670940065 | 0.010489925 | 0.205617796 |
| ENSMUSG00000063689 | Hist2h2ab     | 18.98410288 | 29.23942152 | 80.83352474 | 44.0539244  | 0.012352357 | 0.544995712 |
| ENSMUSG00000063838 | Cdc42ep5      | 9.302562533 | 10.12771896 | 17.60694135 | 9.361926756 | 0.005448752 | 0.53171795  |
| ENSMUSG00000063882 | Uqcrh         | 120.0537962 | 160.5323826 | 312.3545149 | 183.1790686 | 0.019763184 | 0.586446041 |
| ENSMUSG00000064264 | Zfp428        | 118.1617947 | 110.3014438 | 59.93126905 | 36.51945241 | 0.033737538 | 0.609355567 |
| ENSMUSG00000064288 | Hist1h4k      | 247.366758  | 299.3233886 | 366.8946697 | 225.3385751 | 0.036202057 | 0.614177838 |
| ENSMUSG00000064339 | mt-Rnr2       | 46355.78883 | 58486.82405 | 245585.6001 | 194783.8474 | 0.029484886 | 0.793140344 |
| ENSMUSG00000064344 | mt-Tm         | 67.44837584 | 56.67032702 | 673.4556729 | 186.6485238 | 8.52E-11    | 0.277150422 |
| ENSMUSG00000064364 | mt-Th         | 1.621289028 | 2.50023434  | 22.87437857 | 4.847592035 | 0.04416774  | 0.211922349 |
| ENSMUSG00000064373 | Sepp1         | 0.786041694 | 1.011055437 | 2.39800728  | 1.130320581 | 0.032921939 | 0.471358277 |
| ENSMUSG00000064380 |               | 1183.242316 | 2129.702932 | 4357.6      | 2206.442779 | 0.004440571 | 0.506343579 |

|                    |          |             |             |             |             |             |             |
|--------------------|----------|-------------|-------------|-------------|-------------|-------------|-------------|
| ENSMUSG00000064387 | Snora73a | 749.2966421 | 1708.624086 | 3947.255174 | 2106.128247 | 0.009706183 | 0.533567797 |
| ENSMUSG00000064427 |          | 53.12121135 | 93.6634983  | 291.7253061 | 145.2776644 | 0.005207427 | 0.497994728 |
| ENSMUSG00000064451 | Snora23  | 247.7828875 | 398.7552415 | 1986.200603 | 957.040863  | 9.77E-05    | 0.481845017 |
| ENSMUSG00000064495 |          | 23.18861172 | 26.97120507 | 129.3514333 | 67.94493963 | 0.036892065 | 0.52527396  |
| ENSMUSG00000064605 |          | 7.108898257 | 14.10142786 | 73.64040511 | 30.45599564 | 0.00101271  | 0.413577242 |
| ENSMUSG00000064620 |          | 10.98167837 | 10.9060699  | 70.52728282 | 22.53236693 | 0.000325978 | 0.319484404 |
| ENSMUSG00000064634 |          | 391.4943535 | 523.4668856 | 1848.06566  | 446.4616762 | 5.61E-18    | 0.241583233 |
| ENSMUSG00000064637 | Snora20  | 24.61344476 | 35.18518884 | 171.9392147 | 69.98449947 | 0.000306896 | 0.407030471 |
| ENSMUSG00000064682 |          | 12.41922291 | 25.88524694 | 127.4962301 | 40.93633646 | 1.33E-07    | 0.321078799 |
| ENSMUSG00000064741 | Snord14a | 36.62816701 | 53.00488181 | 141.6929835 | 52.22134698 | 0.000214054 | 0.368552808 |
| ENSMUSG00000064772 |          | 5.040428606 | 29.98237308 | 83.01034863 | 41.75411057 | 0.018358524 | 0.502998858 |
| ENSMUSG00000064795 |          | 8.053513459 | 41.4626139  | 201.8734946 | 51.82749416 | 2.28E-12    | 0.256732536 |
| ENSMUSG00000064796 |          | 8.840069208 | 15.17868645 | 33.74412203 | 13.90302015 | 0.000674812 | 0.412013095 |
| ENSMUSG00000064837 | Snora75  | 33.71686676 | 50.398362   | 169.7378324 | 71.52624596 | 8.55E-05    | 0.421392479 |
| ENSMUSG00000064841 |          | 66.41829752 | 146.8156456 | 191.6608279 | 102.1629416 | 0.030073384 | 0.533040281 |
| ENSMUSG00000064856 |          | 33.9843938  | 43.60120362 | 216.5053372 | 121.9920776 | 0.040524582 | 0.563459909 |
| ENSMUSG00000064899 | Snord118 | 248.6230969 | 537.8376254 | 2367.157209 | 731.4153179 | 4.93E-12    | 0.308984682 |
| ENSMUSG00000064901 | Snora21  | 116.4993375 | 198.552915  | 562.3569173 | 300.4015115 | 0.011441114 | 0.534183011 |
| ENSMUSG00000064923 |          | 42.76338868 | 91.83584946 | 276.768566  | 76.83117625 | 1.30E-11    | 0.277600803 |
| ENSMUSG00000064925 | Snora62  | 21.44873224 | 33.35808284 | 246.2241009 | 49.7498902  | 1.21E-17    | 0.202051261 |
| ENSMUSG00000064938 |          | 6.945134421 | 11.43740698 | 43.22894005 | 11.06103886 | 1.71E-05    | 0.255871156 |
| ENSMUSG00000064941 |          | 121.1198068 | 237.0162515 | 794.1317035 | 455.6705782 | 0.047516841 | 0.573797238 |
| ENSMUSG00000064945 |          | 2845.550584 | 2093.004829 | 8918.564026 | 2471.106184 | 2.28E-12    | 0.277074446 |
| ENSMUSG00000065045 |          | 20.53932024 | 50.79104864 | 156.5657948 | 71.24017181 | 0.001725113 | 0.45501747  |
| ENSMUSG00000065089 |          | 283.0088811 | 343.5437678 | 1646.729009 | 730.9864306 | 9.28E-05    | 0.443902079 |
| ENSMUSG00000065118 |          | 11.45238048 | 14.35836591 | 53.54470003 | 21.8703214  | 0.020546998 | 0.408449788 |
| ENSMUSG00000065126 | Snord104 | 260.2100232 | 247.9876637 | 299.7263153 | 152.057639  | 0.013200246 | 0.507321617 |
| ENSMUSG00000065145 |          | 83.61691049 | 184.9345388 | 685.1621874 | 338.7810023 | 0.000525264 | 0.494453735 |
| ENSMUSG00000065176 |          | 76.4836944  | 184.6294903 | 1825.305502 | 542.7544284 | 1.04E-15    | 0.297349911 |
| ENSMUSG00000065219 | Snord32a | 4.909248805 | 4.843827492 | 45.15245398 | 5.88034505  | 2.02E-06    | 0.130233122 |
| ENSMUSG00000065232 |          | 366.289926  | 882.8051977 | 3238.654524 | 1155.744905 | 4.10E-09    | 0.356859584 |
| ENSMUSG00000065265 |          | 441.4377896 | 319.0171454 | 1509.055472 | 782.7076712 | 0.00066139  | 0.51867389  |
| ENSMUSG00000065280 |          | 81.08351432 | 97.86365267 | 336.5426598 | 175.0422581 | 0.00852926  | 0.520119079 |
| ENSMUSG00000065305 |          | 48.016049   | 63.57696453 | 157.11499   | 78.51681046 | 0.027973503 | 0.499741052 |
| ENSMUSG00000065353 | Snora73b | 2456.781279 | 3882.102501 | 8610.77248  | 4318.208204 | 0.011714083 | 0.501489061 |

|                    |               |             |             |             |             |             |             |
|--------------------|---------------|-------------|-------------|-------------|-------------|-------------|-------------|
| ENSMUSG00000065362 |               | 25.5943377  | 42.16176238 | 139.1869894 | 48.69303969 | 8.96E-06    | 0.349839018 |
| ENSMUSG00000065642 | Snora69       | 132.4770014 | 157.6500627 | 487.6524975 | 250.7912488 | 0.009476443 | 0.514282712 |
| ENSMUSG00000065653 |               | 17.76898943 | 21.0374746  | 58.32910145 | 22.37955623 | 0.00642679  | 0.38367737  |
| ENSMUSG00000065687 |               | 8.555363994 | 10.34062291 | 54.2959188  | 9.863926878 | 5.16E-07    | 0.181669766 |
| ENSMUSG00000065701 |               | 992.8496314 | 1166.636885 | 4613.175049 | 2102.965052 | 0.000175839 | 0.455860666 |
| ENSMUSG00000065767 |               | 1.595726166 | 5.675704272 | 25.44006492 | 5.115303236 | 6.92E-06    | 0.201072727 |
| ENSMUSG00000065817 |               | 18.31572757 | 26.65482049 | 81.37739641 | 31.87378172 | 0.002264587 | 0.391678563 |
| ENSMUSG00000065818 | Snord35a      | 14.98861483 | 18.79870868 | 41.83391485 | 15.5550744  | 0.036630417 | 0.371829279 |
| ENSMUSG00000065820 |               | 52.78714326 | 119.7413426 | 430.395893  | 187.0793054 | 1.45E-05    | 0.434667961 |
| ENSMUSG00000065845 |               | 1.876916431 | 1.79479812  | 14.63462459 | 3.775756105 | 0.007496788 | 0.258001569 |
| ENSMUSG00000065870 |               | 3492.856517 | 5597.403429 | 47678.84375 | 16216.68224 | 0.000100094 | 0.340123228 |
| ENSMUSG00000065905 |               | 20.50186583 | 44.65598505 | 262.1548616 | 57.55250641 | 1.87E-17    | 0.219536293 |
| ENSMUSG00000065922 | n-R5-8s1      | 11.52376181 | 5.707769966 | 18.0958446  | 0.651174542 | 5.05E-11    | 0.035984755 |
| ENSMUSG00000065944 |               | 12.2611748  | 76.87921838 | 88.02803018 | 23.74959199 | 1.56E-08    | 0.269795791 |
| ENSMUSG00000066000 | 2610305D13Rik | 30.67084976 | 38.34725275 | 116.2831002 | 69.49604639 | 0.026421154 | 0.597645284 |
| ENSMUSG00000067058 | Rps15a-ps5    | 10.23568398 | 14.47878711 | 90.60822599 | 44.72389549 | 0.000525264 | 0.493596415 |
| ENSMUSG00000067288 | Rps28         | 75.09889587 | 76.65288776 | 237.7300821 | 125.4778906 | 0.000412206 | 0.527816629 |
| ENSMUSG00000067367 | Lyar          | 34.93368008 | 30.4778118  | 43.6511524  | 26.92071972 | 0.032351782 | 0.616724147 |
| ENSMUSG00000067547 | Gm7666        | 21.30615665 | 25.12834724 | 22.88070324 | 12.71856598 | 0.048462115 | 0.555864295 |
| ENSMUSG00000067719 | Gm10221       | 103.1148828 | 102.7645793 | 33.22844734 | 16.43911265 | 0.000739451 | 0.494730087 |
| ENSMUSG00000068184 | Ndufaf2       | 22.34458848 | 24.19835524 | 28.69001062 | 16.16611805 | 0.026671758 | 0.563475499 |
| ENSMUSG00000068396 | Rpl34-ps1     | 38.36475084 | 52.7151077  | 105.2963193 | 53.10533418 | 0.000612253 | 0.50434179  |
| ENSMUSG00000068749 | Psm5          | 127.6591819 | 160.8004699 | 249.9832817 | 141.7517267 | 0.01220392  | 0.567044827 |
| ENSMUSG00000069117 | Gm17352       | 27.27478762 | 31.8812689  | 59.22089782 | 22.40431132 | 5.80E-07    | 0.378317657 |
| ENSMUSG00000069266 | Hist1h4b      | 74.29560419 | 79.37013901 | 146.916561  | 55.22670281 | 6.90E-09    | 0.375905224 |
| ENSMUSG00000070063 | Snora33       | 117.4321093 | 277.2626499 | 902.5814348 | 335.3327215 | 2.55E-08    | 0.371526278 |
| ENSMUSG00000070167 |               | 829.4945428 | 1252.621584 | 1553.334518 | 781.7102727 | 0.001581156 | 0.503246573 |
| ENSMUSG00000071415 | Rpl23         | 718.4638838 | 657.7141141 | 1066.278047 | 496.8189267 | 0.001588727 | 0.465937499 |
| ENSMUSG00000071516 | Hist1h2ai     | 15.72293784 | 23.59709552 | 31.8178366  | 18.05025992 | 0.031378833 | 0.567300038 |
| ENSMUSG00000071653 | 1810009A15Rik | 176.351965  | 159.0778305 | 219.5126317 | 127.037428  | 0.007232926 | 0.57872491  |
| ENSMUSG00000074345 | Tnfaip8l3     | 0.05154497  | 0.088193825 | 0.300518948 | 0.029672135 | 0.047516841 | 0.098736321 |
| ENSMUSG00000075706 | Gpx4          | 110.8815414 | 127.6933816 | 212.7616397 | 129.7760228 | 0.042426967 | 0.609959685 |
| ENSMUSG00000076135 |               | 8.695835337 | 6.983440306 | 128.3851275 | 16.75691079 | 1.13E-16    | 0.130520654 |
| ENSMUSG00000076948 | Mir467e       | 1.283413356 | 1.815408519 | 7.326709318 | 0.3692484   | 0.045284431 | 0.050397577 |
| ENSMUSG00000077167 |               | 84.19890848 | 171.7757582 | 892.3572606 | 376.0049542 | 5.69E-07    | 0.421361456 |

|                    |               |             |             |             |             |             |             |
|--------------------|---------------|-------------|-------------|-------------|-------------|-------------|-------------|
| ENSMUSG00000077323 |               | 147.0610153 | 159.81605   | 2247.042183 | 470.3810565 | 9.43E-26    | 0.209333434 |
| ENSMUSG00000077575 |               | 289.0441997 | 513.3484311 | 759.8713577 | 379.3583876 | 0.002429781 | 0.499240278 |
| ENSMUSG00000077611 |               | 55.13455032 | 117.2475554 | 343.0190414 | 151.7417114 | 1.58E-05    | 0.442371102 |
| ENSMUSG00000078180 |               | 17.2255148  | 19.19102616 | 27.49714914 | 9.105963648 | 8.38E-08    | 0.331160281 |
| ENSMUSG00000078182 | Gm6083        | 15.93501461 | 22.06034302 | 53.92992902 | 26.7401752  | 0.010473424 | 0.495831826 |
| ENSMUSG00000078183 | Gm15610       | 7.800034223 | 11.71992298 | 25.32775873 | 6.858865404 | 7.23E-05    | 0.270804278 |
| ENSMUSG00000078193 | Gm2000        | 104.4036709 | 58.26674035 | 344.1655996 | 121.0590577 | 1.92E-11    | 0.351746537 |
| ENSMUSG00000078502 | Gm13212       | 7.407669166 | 8.404031252 | 27.10292233 | 17.12300245 | 0.047516841 | 0.631776981 |
| ENSMUSG00000078566 | Bnip3         | 21.135941   | 27.27242548 | 54.07260972 | 25.85310673 | 3.35E-05    | 0.478118346 |
| ENSMUSG00000078689 | Mup6          | 2.133723448 | 2.555793974 | 18.17325005 | 7.311045969 | 5.66E-05    | 0.40229711  |
| ENSMUSG00000078713 | Tomm5         | 58.61440517 | 81.19855685 | 163.6133785 | 97.12469591 | 0.01707937  | 0.593623191 |
| ENSMUSG00000078784 | 1810022K09Rik | 47.27958369 | 42.70323077 | 311.0572561 | 116.2668983 | 2.32E-10    | 0.373779733 |
| ENSMUSG00000078861 | Zfp931        | 5.149796112 | 7.80894589  | 17.40062084 | 10.09449895 | 0.022366456 | 0.580122919 |
| ENSMUSG00000078872 | Gm14401       | 26.49456716 | 28.38181403 | 76.00819321 | 46.45267898 | 0.023101303 | 0.611153575 |
| ENSMUSG00000078905 | Gm14393       | 7.16653771  | 8.20332167  | 23.41778351 | 13.52288645 | 0.036355144 | 0.577462271 |
| ENSMUSG00000079316 | Rab9          | 24.57201809 | 22.6621854  | 61.2254744  | 28.60188715 | 1.80E-05    | 0.467156644 |
| ENSMUSG00000079523 | Tmsb10        | 27.33746679 | 33.83839421 | 76.79388917 | 41.74620618 | 0.002327884 | 0.543613647 |
| ENSMUSG00000079604 | Gm13219       | 0.005530874 | 0.00682345  | 0.284238383 | 0           | 7.72E-06    | 0           |
| ENSMUSG00000080152 | Gm12260       | 2.981301137 | 4.168924308 | 21.21986361 | 10.26665631 | 0.029765737 | 0.483822917 |
| ENSMUSG00000080303 | Gm12419       | 0.090163175 | 0.101591966 | 1.670086038 | 0.050510394 | 0.001069407 | 0.030244187 |
| ENSMUSG00000080465 |               | 953.3212434 | 1374.359448 | 3639.707395 | 1019.377945 | 1.21E-12    | 0.2800714   |
| ENSMUSG00000080538 |               | 704.1183651 | 775.198764  | 2116.520274 | 472.1890849 | 9.93E-20    | 0.223096887 |
| ENSMUSG00000080664 |               | 42.81393946 | 59.97518622 | 474.6758468 | 283.0692639 | 0.045755114 | 0.596342253 |
| ENSMUSG00000080684 |               | 12.21983185 | 17.08488707 | 28.02436961 | 9.91693402  | 0.013204115 | 0.353868228 |
| ENSMUSG00000080740 | Gm15013       | 4.012391889 | 3.465597125 | 29.43062131 | 10.74740442 | 1.31E-07    | 0.365177626 |
| ENSMUSG00000080811 | Gm14513       | 76.25063788 | 127.1621205 | 242.6090371 | 31.78750367 | 3.21E-31    | 0.131023576 |
| ENSMUSG00000081049 | Rps24-ps3     | 40.23406768 | 35.09808719 | 196.0634339 | 94.18356194 | 3.11E-05    | 0.480372908 |
| ENSMUSG00000081344 | Gm14303       | 57.34288643 | 63.78482408 | 142.3454931 | 81.91663598 | 0.0106286   | 0.575477553 |
| ENSMUSG00000081603 | Gm14681       | 284.8086678 | 240.6798257 | 471.1560442 | 251.771581  | 0.006348121 | 0.534369842 |
| ENSMUSG00000081627 | Gm13158       | 0.885702407 | 1.186773798 | 1.528846483 | 0.351587181 | 0.036801745 | 0.229968925 |
| ENSMUSG00000081684 | Rps2-ps13     | 2.60062675  | 4.606578162 | 2.831938801 | 1.012752741 | 0.049093396 | 0.357618159 |
| ENSMUSG00000082419 | Gm11425       | 51.88193951 | 58.98056564 | 151.7058108 | 92.47106115 | 0.023295434 | 0.609541986 |
| ENSMUSG00000082765 | Gm14411       | 3.939057065 | 4.503357662 | 16.85897082 | 7.742266583 | 0.001454342 | 0.459237202 |
| ENSMUSG00000082895 | Rpsa-ps9      | 15.3381398  | 13.81210147 | 22.51667886 | 9.122237549 | 1.53E-06    | 0.405132462 |
| ENSMUSG00000083022 | Rps15a-ps6    | 44.11122058 | 36.80328784 | 96.4718769  | 28.68550444 | 1.92E-11    | 0.297345769 |

|                    |               |             |             |             |             |             |             |
|--------------------|---------------|-------------|-------------|-------------|-------------|-------------|-------------|
| ENSMUSG00000083328 | Gm11826       | 2.480596379 | 4.059452924 | 21.3178727  | 7.720773846 | 0.000873667 | 0.362173748 |
| ENSMUSG00000083696 | Gm12563       | 36.4855102  | 57.92629355 | 104.7529754 | 28.72728544 | 7.03E-07    | 0.274238372 |
| ENSMUSG00000084700 |               | 9.276414797 | 24.44073406 | 125.0839225 | 57.76925906 | 0.006457101 | 0.461844    |
| ENSMUSG00000084744 |               | 43.61486371 | 52.49764845 | 122.9127519 | 52.11582829 | 0.000775192 | 0.424006683 |
| ENSMUSG00000084762 | Gm14074       | 73.65772272 | 71.1527433  | 109.5324126 | 64.36803531 | 0.021389277 | 0.587661988 |
| ENSMUSG00000085790 | Gm12729       | 0           | 0           | 4.375868913 | 0.052901042 | 5.55E-10    | 0.012089266 |
| ENSMUSG00000085893 | Gm12091       | 1.396239996 | 1.340680913 | 3.805138772 | 1.057821888 | 0.004961153 | 0.277998242 |
| ENSMUSG00000086147 | Gm13150       | 7.517991827 | 8.217355804 | 22.15214357 | 13.31187663 | 0.023101303 | 0.600929503 |
| ENSMUSG00000086324 | Gm15564       | 32.72973765 | 36.19929305 | 330.8694397 | 11.71123016 | 1.32E-94    | 0.035395321 |
| ENSMUSG00000086470 | Gm12580       | 0.067229101 | 0.019133718 | 29.55964843 | 0           | 1.83E-101   | 0           |
| ENSMUSG00000086567 | Gm16247       | 121.9156302 | 117.2966347 | 393.8567014 | 211.0909886 | 0.000867044 | 0.53595886  |
| ENSMUSG00000088025 |               | 1047.096421 | 2478.607771 | 91.14515071 | 44.40031456 | 0.003133859 | 0.487138528 |
| ENSMUSG00000088059 |               | 219.6730586 | 298.2834291 | 288.1931571 | 132.9894562 | 0.000514771 | 0.461459452 |
| ENSMUSG00000088108 | Snora47       | 39.01461244 | 53.44484889 | 137.1467282 | 59.84668679 | 0.001797133 | 0.436369774 |
| ENSMUSG00000088148 | Mir1983       | 30.01747615 | 26.86746668 | 121.8756572 | 56.4675352  | 0.011356424 | 0.463320867 |
| ENSMUSG00000088208 |               | 6.700885999 | 9.325822859 | 48.58731491 | 16.82125661 | 0.001094012 | 0.346206755 |
| ENSMUSG00000088252 | Snord13       | 30.06034762 | 38.84113024 | 168.5181046 | 39.448179   | 5.55E-10    | 0.23408867  |
| ENSMUSG00000088323 |               | 53.69605248 | 49.43879134 | 119.0516391 | 60.37565961 | 0.039182002 | 0.507138415 |
| ENSMUSG00000088595 |               | 2828.264972 | 1328.488609 | 1504.080408 | 24.95277714 | 2.83E-126   | 0.016590055 |
| ENSMUSG00000088604 |               | 256.1485118 | 348.7276405 | 841.7587722 | 272.7418896 | 2.77E-10    | 0.324014312 |
| ENSMUSG00000088675 |               | 5.352486267 | 13.09967744 | 5.665997567 | 1.492564646 | 0.018464726 | 0.263424865 |
| ENSMUSG00000088712 |               | 9.615108295 | 16.3618449  | 58.4617007  | 13.87504049 | 5.65E-06    | 0.23733556  |
| ENSMUSG00000089855 | Gm15662       | 27.58264266 | 29.92085627 | 75.05889246 | 22.68840792 | 1.39E-06    | 0.30227475  |
| ENSMUSG00000090137 | Uba52         | 9.374530045 | 9.423626557 | 30.59643221 | 16.67700809 | 0.001307299 | 0.545063816 |
| ENSMUSG00000090553 | Snrpe         | 157.1142428 | 221.3377805 | 341.3034005 | 175.1133022 | 0.00255921  | 0.513072246 |
| ENSMUSG00000091537 | Ccdc72        | 20.40086129 | 22.89755989 | 44.89285908 | 21.09637787 | 0.000862819 | 0.469927251 |
| ENSMUSG00000091993 | B930036N1ORik | 1.174022709 | 2.029381561 | 10.08801974 | 5.223176576 | 0.034056781 | 0.517760344 |
| ENSMUSG00000092072 | Gm4540        | 7.495047021 | 6.670251562 | 28.0079525  | 15.16840909 | 0.048144237 | 0.541575079 |
| ENSMUSG00000092680 | Snord55       | 8.099662861 | 11.72289945 | 125.9960371 | 12.33374682 | 1.39E-15    | 0.097889958 |
| ENSMUSG00000092773 |               | 95.03915676 | 181.7677839 | 398.0061266 | 197.6372554 | 0.000395847 | 0.496568375 |
| ENSMUSG00000092887 | Snord53       | 24.0261841  | 26.53837798 | 62.12582693 | 26.74470305 | 0.036441448 | 0.430492508 |
| ENSMUSG00000093044 | Snord8        | 23.94933558 | 36.3309924  | 89.83770813 | 36.12829248 | 0.003012286 | 0.402150647 |
| ENSMUSG00000093077 | Mir5105       | 62472.03134 | 118606.2593 | 285859.0771 | 87242.83648 | 0.010657952 | 0.305195264 |
| ENSMUSG00000093098 | Mir5102       | 855.357693  | 978.5680877 | 2799.190648 | 871.5289313 | 1.80E-12    | 0.31135033  |
| ENSMUSG00000093107 |               | 20.5076952  | 14.67863828 | 56.75219887 | 19.40548858 | 0.002447943 | 0.341933687 |

|                    |         |             |             |             |             |             |             |
|--------------------|---------|-------------|-------------|-------------|-------------|-------------|-------------|
| ENSMUSG00000093183 |         | 41.19184786 | 92.28322362 | 149.4294659 | 90.83518433 | 0.030110056 | 0.607880004 |
| ENSMUSG00000093413 | Snora15 | 277.2533302 | 438.3700646 | 998.9007823 | 333.007117  | 1.39E-09    | 0.333373567 |
| ENSMUSG00000093834 |         | 32.33652705 | 79.56590261 | 86.46442965 | 43.70381562 | 0.036179049 | 0.505454275 |
| ENSMUSG00000093842 |         | 8.573660654 | 13.86638699 | 35.18462747 | 11.16532042 | 0.000300854 | 0.317335189 |
| ENSMUSG00000093843 |         | 43.26100917 | 108.3396984 | 545.9412864 | 249.0543548 | 2.98E-05    | 0.456192563 |
| ENSMUSG00000093956 |         | 18.57998956 | 37.57488885 | 141.5376573 | 60.18648482 | 0.000306372 | 0.425233015 |
| ENSMUSG00000094131 |         | 12.30529751 | 12.04781731 | 132.5114659 | 68.23252167 | 0.026816267 | 0.514917869 |
| ENSMUSG00000094327 |         | 14.92327984 | 17.14704216 | 27.0393242  | 10.50343461 | 0.031825494 | 0.388450337 |
| ENSMUSG00000094330 |         | 12.54633587 | 7.78210832  | 19.26244458 | 5.114782147 | 0.005448752 | 0.26553131  |
| ENSMUSG00000094344 | Gm11942 | 678.4649816 | 546.17828   | 2615.08199  | 1184.94666  | 2.98E-05    | 0.453120271 |
| ENSMUSG00000094377 |         | 79.32335089 | 146.9102635 | 821.1364385 | 288.2107258 | 9.30E-10    | 0.350990057 |
| ENSMUSG00000094405 |         | 19.56266241 | 27.74703078 | 284.342871  | 130.1184129 | 0.001104389 | 0.457610956 |
| ENSMUSG00000094411 |         | 59.5616647  | 74.95829449 | 486.1086848 | 131.0236145 | 1.23E-11    | 0.269535638 |
| ENSMUSG00000094655 |         | 524.3112907 | 1010.475524 | 8571.864065 | 1744.030068 | 3.57E-21    | 0.203459837 |
| ENSMUSG00000094705 |         | 29.81065905 | 42.67250081 | 128.0039648 | 38.71273985 | 2.79E-09    | 0.302433912 |
| ENSMUSG00000094812 |         | 17.92432107 | 47.68739758 | 121.2474052 | 43.48228345 | 1.42E-05    | 0.358624445 |
| ENSMUSG00000095513 |         | 3.401911557 | 4.87312391  | 23.45215458 | 4.915672886 | 0.000214054 | 0.209604319 |
| ENSMUSG00000095580 |         | 8.212342601 | 28.77491408 | 47.10079241 | 20.95967952 | 0.031946594 | 0.444996325 |
| ENSMUSG00000095590 |         | 162.6123429 | 219.8695538 | 1264.053393 | 558.7716448 | 4.95E-05    | 0.442047502 |
| ENSMUSG00000095676 |         | 29.89058822 | 34.946899   | 517.8111655 | 221.6475927 | 3.61E-05    | 0.428047148 |
| ENSMUSG00000095692 |         | 0.797185499 | 0.588456197 | 1.74213618  | 0.238898656 | 0.036800866 | 0.137129725 |
| ENSMUSG00000095699 |         | 2.022240544 | 4.342042088 | 7.364044274 | 0.68062372  | 0.030073384 | 0.092425262 |
| ENSMUSG00000095701 |         | 6.689809793 | 18.25075612 | 75.737241   | 29.27756082 | 0.000535966 | 0.386567565 |
| ENSMUSG00000095868 |         | 64.78073468 | 164.7354365 | 139.4594765 | 54.75114863 | 0.000883426 | 0.392595398 |
| ENSMUSG00000095892 |         | 6.399308227 | 8.520152373 | 127.704887  | 35.39578959 | 4.02E-08    | 0.277168638 |
| ENSMUSG00000096010 | Hist4h4 | 80.40961259 | 102.5947045 | 122.3519299 | 61.46743166 | 0.001253816 | 0.502382199 |
| ENSMUSG00000096205 |         | 8.538158051 | 15.7446082  | 36.8486521  | 16.14723619 | 0.039169447 | 0.438204256 |
| ENSMUSG00000096243 |         | 129.8325763 | 243.9895794 | 1436.399105 | 517.717908  | 1.43E-09    | 0.360427618 |
| ENSMUSG00000096255 | Dynlt1b | 1.97653135  | 2.464704041 | 4.58792482  | 1.654391424 | 0.022366456 | 0.36059689  |
| ENSMUSG00000096280 |         | 14.09978836 | 20.0522377  | 209.7637769 | 92.39052795 | 0.001148226 | 0.440450345 |
| ENSMUSG00000096349 |         | 4235.361596 | 6985.199753 | 41687.13883 | 10014.12452 | 4.20E-10    | 0.24022096  |
| ENSMUSG00000096428 |         | 21.16674511 | 34.76645549 | 135.1905671 | 53.5346209  | 1.09E-05    | 0.395993759 |



List of genes upregulated (p-value < 0.05) after LIF treatment (1h) in Stat3 null cells cultured in 2i

| ENSEMBL_ID          | GENE SYMBOL | Stat3_null_2i (FPKM) | Stat3_null_2i+LIF_1h | Stat3_wt_2i (FPKM) | Stat3_wt_2i+LIF_1h | Adj_pvalue  | Fold Change |
|---------------------|-------------|----------------------|----------------------|--------------------|--------------------|-------------|-------------|
| ENSMUSG00000002325  | Irf9        | 0.995737078          | 3.752201388          | 0.913760545        | 3.390133322        | 7.10E-07    | 3.768265208 |
| ENSMUSG00000007872  | Id3         | 2.301893318          | 6.177045605          | 4.124194418        | 3.746879946        | 0.011826551 | 2.683463025 |
| ENSMUSG000000064387 | Snora73a    | 749.2966421          | 1708.624086          | 3947.255174        | 2106.128247        | 0.034117206 | 2.28030394  |
| ENSMUSG000000064717 |             | 3.017399025          | 18.24056179          | 17.21761953        | 12.51169032        | 0.003339894 | 6.045127489 |
| ENSMUSG000000064772 |             | 5.040428606          | 29.98237308          | 83.01034863        | 41.75411057        | 5.53E-07    | 5.948377693 |
| ENSMUSG000000064795 |             | 8.053513459          | 41.4626139           | 201.8734946        | 51.82749416        | 3.16E-07    | 5.14838823  |
| ENSMUSG000000064841 |             | 66.41829752          | 146.8156456          | 191.6608279        | 102.1629416        | 0.04407075  | 2.210469872 |
| ENSMUSG000000064899 | Snord118    | 248.6230969          | 537.8376254          | 2367.157209        | 731.4153179        | 0.030924048 | 2.163264926 |
| ENSMUSG000000065045 |             | 20.53932024          | 50.79104864          | 156.5657948        | 71.24017181        | 0.046869976 | 2.472869017 |
| ENSMUSG000000065145 |             | 83.61691049          | 184.9345388          | 685.1621874        | 338.7810023        | 0.02043451  | 2.211688255 |
| ENSMUSG000000065176 |             | 76.4836944           | 184.6294903          | 1825.305502        | 542.7544284        | 0.005898041 | 2.413971916 |
| ENSMUSG000000065232 |             | 366.289926           | 882.8051977          | 3238.654524        | 1155.744905        | 0.006366396 | 2.410126883 |
| ENSMUSG000000065251 |             | 2.069870485          | 16.03737474          | 15.57301493        | 7.016417136        | 3.45E-05    | 7.748008804 |
| ENSMUSG000000065622 |             | 1.048357525          | 10.65548016          | 15.09844155        | 8.264851507        | 0.000118633 | 10.16397546 |
| ENSMUSG000000065649 | Snora74a    | 479.8601781          | 1028.121107          | 2085.736856        | 1342.142337        | 0.031378351 | 2.142543086 |
| ENSMUSG000000065820 |             | 52.78714326          | 119.7413426          | 430.395893         | 187.0793054        | 0.031229884 | 2.268380805 |
| ENSMUSG000000065883 |             | 33.44991262          | 79.38662874          | 193.1985982        | 321.0491672        | 0.016418566 | 2.373298539 |
| ENSMUSG000000065944 |             | 12.2611748           | 76.87921838          | 88.02803018        | 23.74959199        | 9.96E-11    | 6.270134765 |
| ENSMUSG000000070063 | Snora33     | 117.4321093          | 277.2626499          | 902.5814348        | 335.3327215        | 0.012001962 | 2.361046324 |
| ENSMUSG000000076281 |             | 56.23141157          | 199.6320925          | 185.344471         | 195.5910341        | 2.87E-05    | 3.550188177 |
| ENSMUSG000000084379 | Gm12957     | 10.69530336          | 25.60639946          | 25.76915543        | 41.77311983        | 0.04407075  | 2.394172338 |
| ENSMUSG000000084722 |             | 13.00738984          | 34.87538271          | 58.33509599        | 69.98168275        | 0.004504655 | 2.681197622 |
| ENSMUSG000000084729 |             | 70.9237249           | 169.0006837          | 217.1410923        | 239.0033874        | 0.003382569 | 2.382851209 |
| ENSMUSG000000084749 |             | 4.544224038          | 14.90915908          | 16.83985045        | 28.73426145        | 0.012001962 | 3.280903176 |
| ENSMUSG000000087775 |             | 3.808848324          | 13.65700714          | 1.779538895        | 2.590568976        | 0.01549514  | 3.585600155 |
| ENSMUSG000000087943 |             | 102.0897524          | 235.191834           | 170.4513548        | 317.0848615        | 0.029890281 | 2.303775143 |
| ENSMUSG000000088025 |             | 1047.096421          | 2478.607771          | 91.14515071        | 44.40031456        | 0.012001962 | 2.367124671 |
| ENSMUSG000000088246 |             | 804.3717242          | 1730.307522          | 1261.478199        | 1222.292248        | 0.01549514  | 2.151129223 |
| ENSMUSG000000089255 | Snora78     | 112.272552           | 269.6481984          | 335.3674439        | 305.0598819        | 0.005898041 | 2.401728593 |
| ENSMUSG000000092674 |             | 95.77635609          | 227.917221           | 216.0800986        | 227.4318044        | 0.004673372 | 2.379681482 |
| ENSMUSG000000092702 |             | 24.01910391          | 74.99113662          | 50.84026622        | 91.81898614        | 3.45E-05    | 3.122145476 |
| ENSMUSG000000092805 |             | 25.23495954          | 63.34817484          | 79.79165969        | 78.78407084        | 0.005898041 | 2.510333917 |

|                    |             |             |             |             |             |             |
|--------------------|-------------|-------------|-------------|-------------|-------------|-------------|
| ENSMUSG00000093056 | 71.8557525  | 204.0393964 | 168.9040715 | 128.3151153 | 5.90E-05    | 2.839569405 |
| ENSMUSG00000093064 | 10.35196628 | 29.52844586 | 34.08235163 | 27.33240904 | 0.008793648 | 2.852448034 |
| ENSMUSG00000093112 | 292.9887318 | 885.1747016 | 960.7454496 | 1091.740835 | 1.61E-05    | 3.021190256 |
| ENSMUSG00000093183 | 41.19184786 | 92.28322362 | 149.4294659 | 90.83518433 | 0.025782133 | 2.240327356 |
| ENSMUSG00000093277 | 0.396446587 | 6.096238788 | 0.442910333 | 1.660797039 | 0.034117206 | 15.37720082 |
| ENSMUSG00000093834 | 32.33652705 | 79.56590261 | 86.46442965 | 43.70381562 | 0.031419354 | 2.460558071 |
| ENSMUSG00000093843 | 43.26100917 | 108.3396984 | 545.9412864 | 249.0543548 | 0.005898041 | 2.504326656 |
| ENSMUSG00000094812 | 17.92432107 | 47.68739758 | 121.2474052 | 43.48228345 | 0.030384098 | 2.660485571 |
| ENSMUSG00000095580 | 8.212342601 | 28.77491408 | 47.10079241 | 20.95967952 | 0.00772767  | 3.503861868 |
| ENSMUSG00000095868 | 64.78073468 | 164.7354365 | 139.4594765 | 54.75114863 | 0.01549514  | 2.542969562 |
| ENSMUSG00000096887 | 64.40309421 | 150.2692786 | 264.8496848 | 594.4436503 | 0.010668259 | 2.333261785 |

List of genes downregulated (p-value < 0.05) after LIF treatment (1h) in Stat3 null cells cultured in 2i

| ENSEMBL_ID         | GENE SYMBOL | Stat3_null_2i (FPKM) | Stat3_null_2i+LIF_1h | Stat3_wt_2i (FPKM) | Stat3_wt_2i+LIF_1h | Adj_pvalue  | Fold Change |
|--------------------|-------------|----------------------|----------------------|--------------------|--------------------|-------------|-------------|
| ENSMUSG00000064350 | mt-Ty       | 101.9363193          | 30.43081038          | 45.0672999         | 276.9400227        | 0.00627727  | 0.298527655 |
| ENSMUSG00000064363 | mt-Nd4      | 307.8405759          | 118.451784           | 272.2964826        | 616.6803702        | 0.030924048 | 0.384782882 |
