# Supplementary material for: Identification of the missing pluripotency mediator downstream of leukaemia inhibitory factor
Source: PubMed Central journal article supplement (PMC3791366; doi:10.1038/emboj.2013.177), 2013-08-13
Supplement: emboj2013177s3.pdf [file emboj2013177s3.pdf]

**Gene down-regulated upon Tfcp2l1 Knockdown**Data from Nishiyama et al, 2013 -  
Series GSE26520 - FC <0.7539691  
1110036E04RIK  
1110051M20RIK  
1600010M07RIK  
1700001K23RIK  
1700003E24RIK  
1700003M02RIK  
1700012B09RIK  
1700013H16RIK  
1700014N06RIK  
1700016C19RIK  
1700019N12RIK  
1700026N04RIK  
1700028I16RIK  
1700049G17RIK  
1700086P04RIK  
1700090G07RIK  
1700109G14RIK  
1700110C19RIK  
1700127D06RIK  
1810007E14RIK  
1810007I06RIK  
1810022C23RIK  
1810043G02RIK  
1810062G17RIK  
1810063I02RIK  
2010004A03RIK  
2010106C02RIK  
2010205J10RIK  
2010209O12RIK  
2200002K05RIK  
2210409D07RIK  
2300002M23RIK  
2310016D23RIK  
2310042E22RIK  
2310051F07RIK  
2410004A20RIK  
2610028H24RIK  
2610203C20RIK  
2610203C22RIK  
2700008G24RIK  
2810434M15RIK  
2900006F19RIK  
3300002A11RIK  
4430402I18RIK  
4831440D22RIK  
4833432E10RIK  
4921511C10RIK  
4930412L05RIK  
4930458A03RIK**Genes upregulated upon Tfcp2l1 over-expression**

Data from Correa Cerro et al., 2011 -

[http://lgsun.grc.nia.nih.gov/ANOVA/output/public-TF\\_indu](http://lgsun.grc.nia.nih.gov/ANOVA/output/public-TF_indu)35673  
38595  
40786  
0610006I08RIK  
0610007C21RIK  
0610009L18RIK  
0610009O20RIK  
0610010E21RIK  
0610010O12RIK  
0610011F06RIK  
0610011L14RIK  
0610031G08RIK  
0610031J06RIK  
0610037P05RIK  
0610040B10RIK  
0710008K08RIK  
1110001A16RIK  
1110001J03RIK  
1110003E01RIK  
1110005A23RIK  
1110008E08RIK  
1110012L19RIK  
1110014K08RIK  
1110017I16RIK  
1110020P15RIK  
1110032A03RIK  
1110032O16RIK  
1110039B18RIK  
1110054O05RIK  
1110065P20RIK  
1110067I12RIK  
1190002N15RIK  
1190005F20RIK  
1200003C05RIK  
1200009I06RIK  
1200014J11RIK  
1200015F23RIK  
1300017J02RIK  
1500005A01RIK  
1500009C09RIK  
1500009L16RIK  
1500010J02RIK  
1500011H22RIK  
1600014C23RIK  
1600021P15RIK  
1700001C19RIK  
1700001L05RIK  
1700001P01RIK  
1700007N14RIK  
1700008P20RIK**Genes bound by Tfcp2l1**

Data from ES Cell ChIP-compendium

[http://bioinformatics.cscr.cam.ac.uk/ES\\_Cell\\_ChIP-seq\\_co](http://bioinformatics.cscr.cam.ac.uk/ES_Cell_ChIP-seq_co)0610007P08RIK  
0610007P14RIK  
0610009B22RIK  
0610010O12RIK  
0610011F06RIK  
0610011L14RIK  
0610012H03RIK  
0610040J01RIK  
100043580  
1110002B05RIK  
1110002L01RIK  
1110003E01RIK  
1110004E09RIK  
1110004F10RIK  
1110007L15RIK  
1110008L16RIK  
1110012J17RIK  
1110014N23RIK  
1110017F19RIK  
1110018G07RIK  
1110020G09RIK  
1110020P15RIK  
1110021J02RIK  
1110021L09RIK  
1110028C15RIK  
1110032A13RIK  
1110034B05RIK  
1110034G24RIK  
1110036O03RIK  
1110037F02RIK  
1110038B12RIK  
1110038D17RIK  
1110038F14RIK  
1110051M20RIK  
1110059E24RIK  
1110067D22RIK  
1190002A17RIK  
1190002H23RIK  
1190002N15RIK  
1190003M12RIK  
1190005I06RIK  
1190007F08RIK  
1200009I06RIK  
1200009O22RIK  
1200011I18RIK  
1200014M14RIK  
1200016B10RIK  
1300002K09RIK  
1300010F03RIK  
1300014I06RIK**Genes Upregulated after Tfcp2l1 OE,  
downregulated after Tfcp2l1 KD  
and bound by Tfcp2l1**2200002K05RIK  
2300002M23RIK  
4930583H14RIK  
8430419L09RIK  
ABLM1  
ADIPOQ  
AFF1  
AGRP  
AGTPBP1  
ALOX12  
ANKRD35  
APOBEC3  
APOD  
ARHGAP9  
B3GALNT1  
B4GALNT1  
BC028528  
BMP7  
BTNL1  
CABP1  
CAPN5  
CAR8  
CBS  
CCDC19  
CCDC68  
CCNG2  
CD97  
CDC42EP2  
CDC42EP4  
CENPB  
CKMT1  
CMTM7  
COBL  
COL13A1  
CPA2  
CPT1A  
CRTAC1  
DCLK3  
DKKL1  
DLGAP3  
DNAHC10  
DOCK10  
DUOX1  
E030011O05RIK  
ENO1  
ESRRB  
FBXO6  
FFAR2  
FXVD4  
GALNT6

4930465M20RIK  
4930519G04RIK  
4930522L14RIK  
4930542C12RIK  
4930550L24RIK  
4930558O21RIK  
4930583H14RIK  
4930583K01RIK  
4931403E03RIK  
4931406H21RIK  
4931420L22RIK  
4932412D23RIK  
4932425I24RIK  
4933406B17RIK  
4933406F09RIK  
4933411K20RIK  
4933413A10RIK  
4933424L07RIK  
4933424L21RIK  
4933432B09RIK  
4933432I09RIK  
4933436H12RIK  
5430427N15RIK  
5730403I07RIK  
5730416O20RIK  
5730507A09RIK  
5830444B04RIK  
6030455H03RIK  
6330500D04RIK  
6430514L14RIK  
8030451F13RIK  
8430419L09RIK  
8430427H17RIK  
8430430B14RIK  
9030625G05RIK  
9130208D14RIK  
9230109A22RIK  
9530008L14RIK  
9630026C02RIK  
9930005F22RIK  
A  
A030004J04RIK  
A2M  
A330023F24RIK  
A330048O09RIK  
A430089I19RIK  
A630010A05RIK  
A630081D01RIK  
A630095N17RIK  
A730006G06RIK  
ABCA4  
ABCA8B  
ABCC3

1700009P17RIK  
1700011J10RIK  
1700012A16RIK  
1700013D24RIK  
1700016F12RIK  
1700016M24RIK  
1700019B21RIK  
1700019N12RIK  
1700020D05RIK  
1700020O03RIK  
1700021F05RIK  
1700021K14RIK  
1700021P04RIK  
1700021P22RIK  
1700022C21RIK  
1700023D19RIK  
1700025E21RIK  
1700025K23RIK  
1700026H06RIK  
1700026L06RIK  
1700028B04RIK  
1700028I16RIK  
1700029J07RIK  
1700029P11RIK  
1700030J22RIK  
1700037C18RIK  
1700040I03RIK  
1700042O10RIK  
1700049E22RIK  
1700049L16RIK  
1700052K11RIK  
1700065D16RIK  
1700071A11RIK  
1700072H12RIK  
1700084J12RIK  
1700108F19RIK  
1700113A16RIK  
1700120B06RIK  
1700125H20RIK  
1700127D06RIK  
1810009J06RIK  
1810009O10RIK  
1810011O10RIK  
1810020D17RIK  
1810021J13RIK  
1810027O10RIK  
1810030N24RIK  
1810035I16RIK  
1810049H13RIK  
1810055E12RIK  
1810055G02RIK  
1810059H22RIK  
1810063I02RIK

1300017J02RIK  
1500001M20RIK  
1500009L16RIK  
1500010J02RIK  
1500031L02RIK  
1500032L24RIK  
1600021P15RIK  
1600029D21RIK  
1700001C02RIK  
1700001C19RIK  
1700001K19RIK  
1700001O22RIK  
1700001P01RIK  
1700003M02RIK  
1700007B14RIK  
1700007G11RIK  
1700007K13RIK  
1700008A04RIK  
1700008J07RIK  
1700008O03RIK  
1700009J07RIK  
1700009P17RIK  
1700010I14RIK  
1700011E24RIK  
1700011H14RIK  
1700011I03RIK  
1700011L22RIK  
1700012A16RIK  
1700013B16RIK  
1700013G24RIK  
1700016C15RIK  
1700016D06RIK  
1700016H13RIK  
1700016K19RIK  
1700017B05RIK  
1700018C11RIK  
1700019D03RIK  
1700019E19RIK  
1700019O17RIK  
1700020C07RIK  
1700020D05RIK  
1700020I14RIK  
1700020N01RIK  
1700020O03RIK  
1700021F05RIK  
1700021F07RIK  
1700021K19RIK  
1700022A21RIK  
1700022C21RIK  
1700022P22RIK  
1700024G13RIK  
1700024P04RIK  
1700025G04RIK

GCM2  
GFRA3  
GGT5  
GJB3  
GPI1  
GRIK4  
GSS  
HAP1  
HEBP1  
HES1  
HK1  
IDH2  
ILDR1  
INHA  
INHBB  
ITPKA  
JAK3  
KCNJ12  
KDELRS  
KDR  
KIT  
KLHDC7A  
KRT23  
LAPTM5  
LDHB  
LDLR  
LGALS3  
LONRF2  
LY6G6E  
LY6K  
LY75  
MOBKL2C  
MRAS  
MT2  
MTAP1A  
MYL4  
MYO1F  
MYOM2  
MYOT  
NANOG  
NFATC2IP  
NID1  
NKX6-3  
NQO1  
NSG2  
PADI4  
PDE8A  
PECAM1  
PFKP  
PIK3IP1  
PKM2  
PPP1R14D  
PQLC1

ABCD2  
ABCG5  
ABHD2  
ABLIM1  
ABLIM2  
ACCN1  
ACOT5  
ACPP  
ADAMTSL1  
ADCY2  
ADCY4  
ADH7  
ADIPOQ  
AF067061  
AFF1  
AGRP  
AGTPBP1  
AKAP4  
AKP5  
ALDOA  
ALDOC  
ALOX12  
AMT  
ANK1  
ANKRD35  
APOBEC3  
APOC2  
APOD  
ARHGAP9  
ARMC2  
ARX  
ASGR2  
ATP6  
ATP7B  
ATP8B4  
AU018829  
AU019157  
AU035318  
AW011738  
AW146299  
AW549542  
B020031M17RIK  
B230311B06RIK  
B3GALNT1  
B4GALNT1  
BAALC  
BATF2  
BB146404  
BC006662  
BC014805  
BC026682  
BC028528  
BC029169

2010004A03RIK  
2010109N14RIK  
2010111I01RIK  
2010200O16RIK  
2010316F05RIK  
2200001I15RIK  
2200001K16RIK  
2200002K05RIK  
2210010N04RIK  
2210011C24RIK  
2210015D19RIK  
2210403K04RIK  
2210408F21RIK  
2210409E12RIK  
2300002M23RIK  
2310002J15RIK  
2310003L22RIK  
2310005C01RIK  
2310005N03RIK  
2310008M10RIK  
2310010J17RIK  
2310011J03RIK  
2310014G06RIK  
2310014H01RIK  
2310016M24RIK  
2310030G06RIK  
2310034G01RIK  
2310039H08RIK  
2310040G24RIK  
2310043M15RIK  
2310046K01RIK  
2310051F07RIK  
2310065F04RIK  
2310067P03RIK  
2310069B03RIK  
2400006E01RIK  
2410003L11RIK  
2410004A20RIK  
2410015M20RIK  
2410018E23RIK  
2410018G20RIK  
2410076I21RIK  
2410091C18RIK  
2410114N07RIK  
2410137F16RIK  
2410137M14RIK  
2410152P15RIK  
2410198J08RIK  
2500002B13RIK  
2510039O18RIK  
2610002J02RIK  
2610019A05RIK  
2610027C15RIK

1700026D08RIK  
1700029F12RIK  
1700029G01RIK  
1700029H14RIK  
1700029I01RIK  
1700029J11RIK  
1700029M20RIK  
1700029P11RIK  
1700030F18RIK  
1700034H15RIK  
1700039E15RIK  
1700040I03RIK  
1700040L02RIK  
1700042G07RIK  
1700052K11RIK  
1700054N08RIK  
1700057K13RIK  
1700065D16RIK  
1700065I17RIK  
1700066M21RIK  
1700067K01RIK  
1700067P10RIK  
1700072E05RIK  
1700073E17RIK  
1700081L11RIK  
1700084E18RIK  
1700086O06RIK  
1700090G07RIK  
1700094C09RIK  
1700096J18RIK  
1700096K18RIK  
1700102P08RIK  
1700106J16RIK  
1700106N22RIK  
1700108F19RIK  
1700112E06RIK  
1700113I22RIK  
1700113O17RIK  
1700125D06RIK  
1810007M14RIK  
1810010H24RIK  
1810011H11RIK  
1810011O10RIK  
1810012P15RIK  
1810013D10RIK  
1810013L24RIK  
1810019J16RIK  
1810020D17RIK  
1810022C23RIK  
1810022K09RIK  
1810032O08RIK  
1810033B17RIK  
1810035L17RIK

PRDM14  
PRKAG1  
PRMT8  
PTGES  
RAPGEF3  
RND1  
RND2  
RPL10A  
SCD1  
SCGB1C1  
SEMA5B  
SERPINB1A  
SERPINB6C  
SFRP1  
SGCD  
SH3BP1  
SLC15A1  
SLC16A9  
SLC30A10  
SLC44A1  
SLC44A3  
SLC6A8  
SLIT2  
SMAD7  
SMARCD3  
SMCR7  
SNAP91  
SPIC  
SPIN4  
SPINT1  
SPNS3  
SPP1  
STRA8  
SULT5A1  
TBX3  
TCFCP2L1  
TCL1  
TEAD2  
TFPI  
TGFB1  
TGM2  
TMEM117  
TRAIP  
TRIM16  
TRIML1  
TUBB2A  
VEGFA  
WFDC2  
WIP1  
WSCD2  
ZAP70  
ZFP459  
ZFP516

BC049265  
BC049352  
BC051142  
BC065085  
BC080695  
BCL9  
BHMT2  
BIN2  
BMP7  
BTNL1  
C130074G19RIK  
C130090K23RIK  
C230093N12RIK  
C330004P14RIK  
C330024D12RIK  
C330026N13RIK  
C430049B03RIK  
C530044C16RIK  
C80719  
C86695  
CABP1  
CABP4  
CABP7  
CACNG8  
CALR4  
CAMK2B  
CAMK2N1  
CAPN5  
CAR8  
CASR  
CBLN1  
CBS  
CCDC148  
CCDC19  
CCDC60  
CCDC68  
CCDC79  
CCNG2  
CD164L2  
CD302  
CD37  
CD86  
CD97  
CDC42EP2  
CDC42EP4  
CDH20  
CDX1  
CENPB  
CHI3L1  
CHRNA  
CHST2  
CKMT1  
CLDN10

2610029G23RIK  
2610029I01RIK  
2610036L11RIK  
2610205E22RIK  
2610209M04RIK  
2700029M09RIK  
2700038C09RIK  
2700060E02RIK  
2700099C18RIK  
2810001A02RIK  
2810004N23RIK  
2810008D09RIK  
2810025M15RIK  
2810048G17RIK  
2810405K02RIK  
2810416G20RIK  
2810417H13RIK  
2810422J05RIK  
2810422O20RIK  
2810442I21RIK  
2810451A06RIK  
2900042B11RIK  
2900083I11RIK  
3010026O09RIK  
3100002J23RIK  
3100002L24RIK  
3110009E22RIK  
3110040N11RIK  
3110043A19RIK  
3300001G02RIK  
3321401G04RIK  
3830408C21RIK  
4632419K20RIK  
4833426J09RIK  
4921524J17RIK  
4921530G04RIK  
4922501C03RIK  
4930401A07RIK  
4930402D18RIK  
4930402H24RIK  
4930405M20RIK  
4930412M03RIK  
4930429E23RIK  
4930430E16RIK  
4930431P19RIK  
4930432K21RIK  
4930434E21RIK  
4930455B14RIK  
4930479M11RIK  
4930480K15RIK  
4930484I04RIK  
4930500J02RIK  
4930500O09RIK

1810041L15RIK  
1810055G02RIK  
1810063B07RIK  
2010001E11RIK  
2010001M09RIK  
2010002N04RIK  
2010005J08RIK  
2010007H12RIK  
2010011I20RIK  
2010106G01RIK  
2010107G12RIK  
2010107G23RIK  
2010107H07RIK  
2010109I03RIK  
2010110P09RIK  
2010111I01RIK  
2010204K13RIK  
2010300C02RIK  
2010305A19RIK  
2200001I15RIK  
2200002K05RIK  
2210009G21RIK  
2210010C04RIK  
2210010C17RIK  
2210018M11RIK  
2210020M01RIK  
2210021J22RIK  
2210023G05RIK  
2210403K04RIK  
2210404J11RIK  
2210404O07RIK  
2210407C18RIK  
2210417A02RIK  
2300002M23RIK  
2310001K24RIK  
2310004N24RIK  
2310007B03RIK  
2310007H09RIK  
2310008H04RIK  
2310008H09RIK  
2310009B15RIK  
2310014L17RIK  
2310016C08RIK  
2310016E02RIK  
2310016M24RIK  
2310022A10RIK  
2310028H24RIK  
2310028O11RIK  
2310030G06RIK  
2310030N02RIK  
2310033P09RIK  
2310042E22RIK  
2310043J07RIK

CLEC4B1  
CMTM7  
CNR2  
CNTNAP3  
COBL  
COL13A1  
COX2  
CPA1  
CPA2  
CPB2  
CPNE4  
CPT1A  
CRTAC1  
CSF2RB2  
CST7  
CTSG  
CXCL17  
CXCR4  
D130059P03RIK  
D330027H18RIK  
D430041D05RIK  
D630039A03RIK  
D730048J04RIK  
DAZL  
DCHS2  
DCLK3  
DEFB42  
DKKL1  
DLEU7  
DLGAP1  
DLGAP2  
DLGAP3  
DLX4  
DNAHC10  
DNAHC17  
DNAJB13  
DOCK10  
DUB1  
DUOX1  
DUSP13  
E030011O05RIK  
E130113E03RIK  
E130116L18RIK  
EG266459  
EG328314  
EG333669  
EG381936  
EG382919  
EG384356  
EG434225  
EG449630  
EG545893  
EG545929

4930503E14RIK  
4930504H06RIK  
4930509E16RIK  
4930513N10RIK  
4930518J21RIK  
4930519N13RIK  
4930524J08RIK  
4930528F23RIK  
4930535I16RIK  
4930539J05RIK  
4930550G17RIK  
4930558O21RIK  
4930570C03RIK  
4930579G22RIK  
4930583H14RIK  
4930592I03RIK  
4931420L22RIK  
4931428F04RIK  
4932415G12RIK  
4932425I24RIK  
4932442K08RIK  
4933403G14RIK  
4933413A10RIK  
4933421I07RIK  
4933426I21RIK  
4933426K21RIK  
4933432G23RIK  
4933437F05RIK  
5031439G07RIK  
5133400G04RIK  
5330417C22RIK  
5330426P16RIK  
5330437I02RIK  
5430407P10RIK  
5530401N12RIK  
5730405O15RIK  
5730409G15RIK  
5730419I09RIK  
5730437N04RIK  
5730446C15RIK  
5730455P16RIK  
5730593F17RIK  
5730596B20RIK  
5830405N20RIK  
5830482F20RIK  
6030442E23RIK  
6030455H03RIK  
6230427J02RIK  
6330403L08RIK  
6330407J23RIK  
6330514A18RIK  
6330534C20RIK  
6330549H03RIK

2310044G17RIK  
2310044H10RIK  
2310045N01RIK  
2310046A06RIK  
2310046K01RIK  
2310046O06RIK  
2310047M10RIK  
2310057M21RIK  
2310061C15RIK  
2310067B10RIK  
2310079N02RIK  
2400003C14RIK  
2410002F23RIK  
2410002I01RIK  
2410015M20RIK  
2410016O06RIK  
2410017P07RIK  
2410042D21RIK  
2410075B13RIK  
2410076I21RIK  
2410089E03RIK  
2410127L17RIK  
2410129H14RIK  
2410137F16RIK  
2410137M14RIK  
2510009E07RIK  
2510012J08RIK  
2510027J23RIK  
2510039O18RIK  
2610002I17RIK  
2610018G03RIK  
2610019F03RIK  
2610020H08RIK  
2610021K21RIK  
2610027L16RIK  
2610028A01RIK  
2610028E06RIK  
2610034B18RIK  
2610034M16RIK  
2610035D17RIK  
2610036D13RIK  
2610039C10RIK  
2610044O15RIK  
2610101N10RIK  
2610109H07RIK  
2610203C22RIK  
2610204M08RIK  
2610301B20RIK  
2610301F02RIK  
2610306M01RIK  
2610528E23RIK  
2610528J11RIK  
2700023E23RIK

EG620899  
EG622644  
EG624918  
EG625262  
EG625670  
EG628871  
EG629798  
EG633089  
EG653016  
EG665871  
EG666272  
EG666920  
EG667483  
EG668730  
EGFBP2  
EHF  
ENO1  
ENSMUSG0000060247  
EPHB6  
ESRRB  
ESX1  
EYA2  
F7  
FADS6  
FATE1  
FBXL2  
FBXO11  
FBXO6  
FER1L3  
FFAR2  
FXVD4  
GALNT6  
GCAP3  
GCET2  
GCM2  
GDI1  
GDPD4  
GFAP  
GFRA1  
GFRA3  
GGT5  
GJB1  
GJB3  
GJB4  
GLS  
GM1019  
GM1307  
GM1408  
GM1467  
GM1524  
GM257  
GM26  
GM340

6430514L14RIK  
6430527G18RIK  
6430531B16RIK  
6530437J22RIK  
6720401G13RIK  
6720460F02RIK  
8030402F09RIK  
8030423J24RIK  
8030474K03RIK  
8430416G17RIK  
8430419L09RIK  
8430430B14RIK  
9030607L17RIK  
9030617O03RIK  
9030625G05RIK  
9130011E15RIK  
9130017N09RIK  
9130230N09RIK  
9230109A22RIK  
9230110K08RIK  
9330129D05RIK  
9330159F19RIK  
9330161A08RIK  
9330199F22RIK  
9430069I07RIK  
9430081H08RIK  
9530020O07RIK  
9530048O09RIK  
9530077C05RIK  
9530080O11RIK  
9630033F20RIK  
A130015J22RIK  
A130022J15RIK  
A2M  
A430018G15RIK  
A430089I19RIK  
A530001N23RIK  
A530082C11RIK  
A630010A05RIK  
A630018P17RIK  
A630054L15RIK  
A630081D01RIK  
A730063M14RIK  
A730085A09RIK  
A730085K08RIK  
A830012C17RIK  
A830035A12RIK  
A930002C04RIK  
A930012O16RIK  
AA415398  
AARS  
AB030242  
ABCA2

2700060E02RIK  
2700062C07RIK  
2700078E11RIK  
2700081O15RIK  
2700094K13RIK  
2810002N01RIK  
2810006K23RIK  
2810008D09RIK  
2810008M24RIK  
2810021J22RIK  
2810025M15RIK  
2810030E01RIK  
2810055F11RIK  
2810055G20RIK  
2810408A11RIK  
2810408P10RIK  
2810410L24RIK  
2810422O20RIK  
2810429I04RIK  
2810432D09RIK  
2810453I06RIK  
2810459M11RIK  
2810474O19RIK  
2900005J15RIK  
2900006K08RIK  
2900010M23RIK  
2900026A02RIK  
2900041M22RIK  
2900052N01RIK  
2900097C17RIK  
3010026O09RIK  
3110001D03RIK  
3110003A17RIK  
3110079O15RIK  
3110082D06RIK  
3110082I17RIK  
3110099E03RIK  
3230401D17RIK  
3300002I08RIK  
3830406C13RIK  
3930402G23RIK  
4432412L15RIK  
4631416L12RIK  
4632411B12RIK  
4632428N05RIK  
4732418C07RIK  
4732471D19RIK  
4732471J01RIK  
4831426I19RIK  
4833403I15RIK  
4833420G17RIK  
4833439L19RIK  
4833442J19RIK

GM347  
GM364  
GM443  
GM5  
GM575  
GM749  
GM799  
GM807  
GM885  
GM967  
GMCL1L  
GOLT1A  
GP9  
GPI1  
GPR182  
GPR64  
GPR83  
GRIK4  
GRM2  
GSS  
H60A  
HAMP  
HAP1  
HDRPA  
HEBP1  
HES1  
HESX1  
HFE  
HHIP  
HIST2H2BB  
HK1  
HNF4A  
HOXC12  
HOXD10  
HSPB2  
HSPB6  
HUS1B  
HYAL3  
ICAM2  
ID4  
IDH2  
IFLD5  
IGH-V3660  
IGK-V19-14  
IGK-V23  
IL16  
IL1RL2  
IL2RB  
IL6RA  
ILDRL1  
INHA  
INHBB  
INPPL1

ABCA3  
ABCA7  
ABCB6  
ABCB9  
ABCC10  
ABCC3  
ABCF3  
ABHD11  
ABHD4  
ABI3  
ABLM1  
ACAA2  
ACACB  
ACAD10  
ACAD11  
ACADS  
ACAT3  
ACBD4  
ACO2  
ACOT8  
ACOT9  
ACP5  
ACP6  
ACSS2  
ACTN1  
ACTN4  
ACTR10  
ACTR1A  
ACTR2  
ADAM15  
ADAM8  
ADAM9  
ADAMTS10  
ADAMTS20  
ADCK5  
ADCY3  
ADD1  
ADD3  
ADFP  
ADIPOQ  
ADPRH  
AEBP2  
AES  
AFAP1L1  
AFF1  
AFMID  
AFTPH  
AGA  
AGPAT4  
AGPS  
AGRP  
AGTPBP1  
AHCYL1

4921504E06RIK  
4921506M07RIK  
4921515J06RIK  
4921517D22RIK  
4921517L17RIK  
4921521F21RIK  
4921523A10RIK  
4921524J17RIK  
4921528O07RIK  
4921530L21RIK  
4921539E11RIK  
4922501L14RIK  
4922505E12RIK  
4922505G16RIK  
4930404N11RIK  
4930412C18RIK  
4930412O13RIK  
4930417O13RIK  
4930420K17RIK  
4930422I07RIK  
4930426L09RIK  
4930429B21RIK  
4930434E21RIK  
4930442L01RIK  
4930444A02RIK  
4930452B06RIK  
4930453N24RIK  
4930455C21RIK  
4930465K10RIK  
4930470P17RIK  
4930471G03RIK  
4930471M23RIK  
4930473A06RIK  
4930483J18RIK  
4930486L24RIK  
4930488L21RIK  
4930503L19RIK  
4930506M07RIK  
4930507D05RIK  
4930511I11RIK  
4930511M06RIK  
4930515G01RIK  
4930519F16RIK  
4930519G04RIK  
4930523C07RIK  
4930524B15RIK  
4930525F21RIK  
4930526D03RIK  
4930528F23RIK  
4930529M08RIK  
4930534B04RIK  
4930538K18RIK  
4930539E08RIK

IQCH  
IQCK  
ITPKA  
JAK3  
KCNH1  
KCNJ12  
KCTD4  
KDELR3  
KDR  
KIF21B  
KIFC5C  
KIT  
KLHDC7A  
KLK1  
KLK10  
KLK11  
KLK1B1  
KLK1B11  
KLK1B24  
KLK1B26  
KLK1B3  
KLRA1  
KRT12  
KRT16  
KRT17  
KRT23  
KRT27  
KRT79  
LAPTM5  
LAYN  
LDHAL6B  
LDHB  
LDHD  
LDLR  
LEFTY2  
LGALS3  
LIM2  
LOC215996  
LOC233184  
LOC235509  
LOC330599  
LOC382044  
LOC385472  
LOC432591  
LOC432691  
LOC432715  
LOC433944  
LOC434061  
LOC434136  
LOC434335  
LOC434660  
LOC434746  
LOC434846

AHNAK  
AHNAK2  
AI413582  
AI464131  
AI467606  
AI662250  
AI837181  
AI842396  
AIFM1  
AIFM2  
AIM1L  
AIP  
AK2  
AKAP7  
AKT1S1  
ALDH16A1  
ALDH7A1  
ALDOC  
ALG5  
ALG8  
ALKBH2  
ALKBH5  
ALKBH7  
ALOX12  
ALPK3  
ALPL  
ALS2CR13  
ALS2CR2  
AMDHD2  
AMHR2  
AMPD3  
ANAPC10  
ANAPC11  
ANGEL1  
ANGPTL4  
ANKK1  
ANKRD1  
ANKRD28  
ANKRD35  
ANKRD45  
ANKRD52  
ANP32A  
ANXA1  
ANXA11  
ANXA5  
AP1S1  
AP2A1  
AP3M2  
AP4B1  
AP4M1  
APH1B  
APH1C  
APIP

4930539J05RIK  
4930547C10RIK  
4930555I21RIK  
4930563D23RIK  
4930567H12RIK  
4930571K23RIK  
4930579E17RIK  
4930579G22RIK  
4930579K19RIK  
4930583H14RIK  
4930583K01RIK  
4930588N13RIK  
4931406P16RIK  
4931408A02RIK  
4931429I11RIK  
4931432M23RIK  
4931440L10RIK  
4931440P22RIK  
4932412H11RIK  
4932416H05RIK  
4932418E24RIK  
4932431H17RIK  
4932435O22RIK  
4932438H23RIK  
4932441K18RIK  
4932443I19RIK  
4933401F05RIK  
4933402J07RIK  
4933403G14RIK  
4933404M02RIK  
4933406M09RIK  
4933407C03RIK  
4933407H18RIK  
4933407P14RIK  
4933411K20RIK  
4933412E24RIK  
4933413N12RIK  
4933421E11RIK  
4933421I07RIK  
4933426M11RIK  
4933427D06RIK  
4933427D14RIK  
4933432B09RIK  
4933432I09RIK  
4933433P14RIK  
4933437F05RIK  
4933439C10RIK  
4933439F18RIK  
5031414D18RIK  
5031425F14RIK  
5031439G07RIK  
5033406O09RIK  
5033411D12RIK



LOC435145  
LOC435492  
LOC435497  
LOC435798  
LOC544808  
LOC545238  
LOC546096  
LOC547322  
LOC620509  
LOC622924  
LOC625360  
LOC627530  
LOC627695  
LOC627905  
LOC629424  
LOC630555  
LOC639975  
LOC640779  
LOC668758  
LOC673289  
LOC673656  
LOC674232  
LOC674794  
LOC675151  
LOC675388  
LOC676330  
LONRF2  
LPAR1  
LRCH1  
LRFN1  
LRRC15  
LRRC18  
LRRN3  
LY6G6E  
LY6K  
LY75  
MAK  
MAPK4  
MCAM  
MEOX2  
MESDC1  
MESDC2  
MFRP  
MFSD4  
MGC118608  
MIER1  
MITF  
MOBKL2C  
MORN1  
MRAP  
MRAS  
MS4A6B  
MT2

APOA1BP  
APOBEC2  
APOBEC3  
APOC1  
APOC4  
APOD  
APOE  
APOL8  
APOM  
ARAF  
ARBP  
ARF2  
ARF5  
ARFIP2  
ARHGAP17  
ARHGAP30  
ARHGAP9  
ARHGEF10L  
ARHGEF12  
ARHGEF15  
ARHGEF16  
ARH2  
ARL1  
ARL13B  
ARL15  
ARL3  
ARL4D  
ARL6IP3  
ARL8B  
ARMC10  
ARMC5  
ARPC1B  
ARRDC2  
ARSA  
ARVCF  
AS3MT  
ASB10  
ASGR2  
ASL  
ASNA1  
ASNS  
ASPSCR1  
ASRGL1  
ASS1  
ATAD4  
ATG12  
ATG4B  
ATG9B  
ATMIN  
ATP11B  
ATP12A  
ATP1B1  
ATP2A3

5033414D02RIK  
5033414K04RIK  
5133401N09RIK  
5330413P13RIK  
5330417C22RIK  
5330426P16RIK  
5330437I02RIK  
5430407P10RIK  
544988  
5730403M16RIK  
5730409E04RIK  
5730410E15RIK  
5730419I09RIK  
5730422E09RIK  
5730437N04RIK  
5730455O13RIK  
5730469M10RIK  
5730494N06RIK  
5730508B09RIK  
5730522E02RIK  
5730528L13RIK  
5730559C18RIK  
5730601F06RIK  
5830405N20RIK  
5830416P10RIK  
5830418K08RIK  
5830433M19RIK  
5930412G12RIK  
6030405A18RIK  
6030419C18RIK  
6030458C11RIK  
6030468B19RIK  
6130401L20RIK  
6330403A02RIK  
6330403K07RIK  
6330406I15RIK  
6330407J23RIK  
6330408A02RIK  
6330409N04RIK  
6330512M04RIK  
6330545A04RIK  
6330577E15RIK  
6430527G18RIK  
6430531B16RIK  
6430537H07RIK  
6430548M08RIK  
6430562O15RIK  
6430571L13RIK  
6430573F11RIK  
6430598A04RIK  
6430704M03RIK  
6530402F18RIK  
6530411M01RIK

MTAP1A  
MUC4  
MYBPC3  
MYBPH  
MYL4  
MYL7  
MYLC2PL  
MYO1F  
MYOCD  
MYOD1  
MYOM2  
MYOT  
MYPN  
NANOG  
NANOS2  
NCF2  
ND1  
NDUFA4L2  
NEBL  
NFATC2IP  
NFE2  
NFE2L3  
NID1  
NKX6-3  
NMU  
NOBOX  
NOTCH4  
NQO1  
NSG2  
NXF2  
OAS1A  
OAS1D  
OBOX6  
OBSCN  
OGDHL  
OIT3  
OLFR1042  
OLFR1044  
OLFR1054  
OLFR1310  
OLFR20  
OLFR220  
OLFR23  
OLFR309  
OLFR339  
OLFR494  
OLFR584  
OLFR638  
OLFR676  
OLFR787  
OLFR921  
OLFR935  
OLFR954

ATP5C1  
ATP5G1  
ATP5S  
ATP6AP1  
ATP6V0B  
ATP6V0E2  
ATP6V1A  
ATP6V1B2  
ATP6V1H  
ATPBD1B  
ATXN3  
AU021092  
AURKA  
AW061290  
AW146299  
AW549542  
AYM1  
AZIN1  
B230206L02RIK  
B230311B06RIK  
B230312A22RIK  
B230369F24RIK  
B330016D10RIK  
B3GALNT1  
B3GAT3  
B3GNT2  
B3GNT8  
B430105G09RIK  
B4GALNT1  
B4GALNT4  
B4GALT1  
B4GALT5  
B930041F14RIK  
B9D1  
B9D2  
BAD  
BAMBI  
BAT2  
BAT4  
BB146404  
BBS2  
BBS4  
BBS5  
BBS7  
BC003266  
BC003993  
BC008155  
BC008163  
BC011487  
BC013491  
BC017647  
BC018507  
BC020002

6720401G13RIK  
6720456B07RIK  
6720457D02RIK  
7420416P09RIK  
8430406I07RIK  
8430410K20RIK  
8430419L09RIK  
8430426H19RIK  
8430427H17RIK  
8430429K09RIK  
9030224M15RIK  
9030409G11RIK  
9030420J04RIK  
9030425E11RIK  
9030617O03RIK  
9030624J02RIK  
9030625A04RIK  
9130011E15RIK  
9130011J15RIK  
9130014G24RIK  
9130019O22RIK  
9130024F11RIK  
9130404D08RIK  
9230110C19RIK  
9230116N13RIK  
9330111N05RIK  
9330129D05RIK  
9330175E14RIK  
9430015G10RIK  
9430020K01RIK  
9430023L20RIK  
9430038I01RIK  
9430060I03RIK  
9430070O13RIK  
9430076C15RIK  
9430083A17RIK  
9530026P05RIK  
9530068E07RIK  
9530077C05RIK  
9630025I21RIK  
9630028H03RIK  
9630033F20RIK  
9830001H06RIK  
9930013L23RIK  
9930023K05RIK  
A  
A130010J15RIK  
A130022J15RIK  
A130040M12RIK  
A130042E20RIK  
A130049A11RIK  
A230020J21RIK  
A230051G13RIK

OLFR961  
OLFR984  
OPN4  
OSBPL6  
OTTMUSG00000000712  
OTTMUSG00000000990  
OTTMUSG00000010086  
OTTMUSG00000010537  
OTTMUSG00000015643  
OTUD6A  
PADI4  
PAM  
PAQR6  
PBP2  
PCDHB10  
PCDHB15  
PCK1  
PDE11A  
PDE4A  
PDE5A  
PDE6C  
PDE8A  
PDE9A  
PECAM1  
PFKP  
PGLYRP1  
PIK3IP1  
PILRA  
PIP5K1B  
PKD2L1  
PKM2  
PLA2G4E  
PLCD4  
PLD1  
PLEKHG1  
POLN  
PPP1R14D  
PPP1R3G  
PQLC1  
PRAMEL4  
PRAMEL6  
PRDM14  
PRG4  
PRKAG1  
PRMT8  
PROK2  
PROKR1  
PRSS34  
PRSS35  
PSAP  
PSG28  
PSG-PS1  
PTGER2

BC021614  
BC022960  
BC024978  
BC025076  
BC028528  
BC029169  
BC030183  
BC031181  
BC032203  
BC037703  
BC046404  
BC049762  
BC050196  
BC051227  
BC055111  
BC057022  
BC057893  
BC061212  
BC066028  
BC099439  
BCAN  
BCAP29  
BCAS2  
BCDIN3D  
BCKDHB  
BCL2L1  
BCL3  
BET1L  
BEX1  
BEX2  
BEX4  
BEX6  
BHLHB2  
BIN2  
BIRC3  
BLM  
BLNK  
BLVRA  
BLVRB  
BMP5  
BMP7  
BPHL  
BRCA1  
BRCA2  
BRCC3  
BRE  
BRP44  
BRP44L  
BSCL2  
BSG  
BTBD1  
BTNL1  
BUB1B

A230056P14RIK  
A230065H16RIK  
A230069A22RIK  
A2BP1  
A330040F15RIK  
A330050F15RIK  
A3GALT2  
A430005L14RIK  
A430078G23RIK  
A430107O13RIK  
A4GALT  
A4GNT  
A530013C23RIK  
A530053G22RIK  
A530054K11RIK  
A630007B06RIK  
A730008H23RIK  
A730011L01RIK  
A730017L22RIK  
A830018L16RIK  
A830080D01RIK  
A930001N09RIK  
A930004D18RIK  
A930011G23RIK  
A930015D03RIK  
AA408296  
AA543186  
AA881470  
AA960436  
AAAS  
AACS  
AAMP  
AANAT  
AARS  
AARS2  
AASDH  
AASDHPPT  
AATK  
ABAT  
ABCA1  
ABCA12  
ABCA13  
ABCA3  
ABCA5  
ABCA7  
ABCA8B  
ABCB10  
ABCB6  
ABCB9  
ABCC4  
ABCC5  
ABCC6  
ABCC9

PTGES  
PTGS1  
PTP4A3  
PTPN20  
PTPN5  
PTPRD  
PYGL  
RAET1E  
RAPGEF3  
RASD1  
RASSF8  
RAX  
RBM44  
RBM47  
RIPK5  
RLN1  
RND1  
RND2  
RNF135  
RP23-233H9.5  
RP23-394O9.3  
RPL10A  
RPTN  
RRAS  
RUNDC2A  
S100A13  
SAA1  
SAA2  
SAA3  
SAMM50  
SCD1  
SCGB1C1  
SDC4  
SEC16B  
SEC31B  
SEMA4B  
SEMA5B  
SEMA6C  
SERPINB1A  
SERPINB1B  
SERPINB1C  
SERPINB6C  
SFI1  
SFRP1  
SGCD  
SH3BP1  
SIDT2  
SLC13A5  
SLC15A1  
SLC16A9  
SLC30A10  
SLC44A1  
SLC44A3

C030039L03RIK  
C030044B11RIK  
C030046E11RIK  
C130034I18RIK  
C130039O16RIK  
C130040J23RIK  
C130069I09RIK  
C1QTNF4  
C1S  
C2  
C230093N12RIK  
C330001K17RIK  
C330002G04RIK  
C330004M20RIK  
C330005M16RIK  
C330006K01RIK  
C330016O10RIK  
C330024D21RIK  
C330048F19  
C430049B03RIK  
C530044N13RIK  
C730025P13RIK  
C78283  
C920006O11RIK  
CAB39L  
CABC1  
CABP1  
CACNG7  
CADM4  
CALB2  
CALCOCO2  
CALML4  
CALR  
CAMK1D  
CANT1  
CAPN1  
CAPN5  
CAPNS1  
CAPSL  
CAR13  
CAR8  
CASP3  
CASQ1  
CAST  
CAT  
CATSPER2  
CBLC  
CBR3  
CBR4  
CBS  
CCBL2  
CCDC103  
CCDC104

ABCD3  
ABCD4  
ABCF2  
ABCG1  
ABCG4  
ABHD10  
ABHD12  
ABHD14B  
ABHD2  
ABHD3  
ABHD5  
ABHD6  
ABI1  
ABI2  
ABI3  
ABL1  
ABL2  
ABLIM1  
ABLIM2  
ABLIM3  
ABR  
ABRA  
ABT1  
ABTB2  
ACAA2  
ACACA  
ACACB  
ACADM  
ACADSB  
ACAP2  
ACAP3  
ACBD3  
ACBD4  
ACBD6  
ACCN1  
ACCN2  
ACCN4  
ACCS  
ACCSL  
ACE  
ACER1  
ACER2  
ACHE  
ACLY  
ACMSD  
ACO1  
ACOT1  
ACOT11  
ACOT12  
ACOT2  
ACOT7  
ACOT8  
ACOXL

SLC46A2  
SLC5A3  
SLC6A13  
SLC6A7  
SLC6A8  
SLIT2  
SMAD7  
SMARCD3  
SMCR7  
SNAP91  
SNCG  
SNF1LK  
SNORD116  
SNRPD3  
SORBS3  
SORL1  
SPARCL1  
SPEER4B  
SPEG  
SPIC  
SPIN4  
SPINT1  
SPNS3  
SPP1  
SSTR3  
ST3GAL3  
ST8SIA6  
STAB1  
STRA8  
SULT1A1  
SULT5A1  
SYT10  
SYT8  
TAAR3  
TAC2  
TAOK1  
TBX3  
TCFCP2L1  
TCL1  
TCSTV1  
TCSTV3  
TCTEX1D1  
TDPOZ1  
TDPOZ3  
TDPOZ4  
TEAD2  
TEX13  
TEX18  
TFF3  
TFPI  
TGFB1  
TGM2  
TGM3

CCDC113  
CCDC115  
CCDC130  
CCDC14  
CCDC19  
CCDC22  
CCDC24  
CCDC28B  
CCDC3  
CCDC32  
CCDC44  
CCDC5  
CCDC55  
CCDC68  
CCDC77  
CCDC85B  
CCDC88A  
CCDC88C  
CCDC89  
CCDC94  
CCDC96  
CCHCR1  
CCNA1  
CCND1  
CCND3  
CCNE1  
CCNF  
CCNG2  
CCRK  
CCT8  
CD109  
CD248  
CD2BP2  
CD38  
CD55  
CD59A  
CD59B  
CD63  
CD68  
CD79B  
CD9  
CD97  
CDC123  
CDC25B  
CDC2L1  
CDC37L1  
CDC42EP1  
CDC42EP2  
CDC42EP4  
CDC42EP5  
CDC6  
CDK2  
CDK5RAP1

ACP2  
ACP5  
ACP6  
ACPL2  
ACRBP  
ACSBG1  
ACSBG2  
ACSF2  
ACSF3  
ACSL1  
ACSL3  
ACSL4  
ACSL5  
ACSL6  
ACSS1  
ACTB  
ACTBL2  
ACTG1  
ACTL6A  
ACTL6B  
ACTL7A  
ACTN1  
ACTN4  
ACTR10  
ACTR1B  
ACTR2  
ACTR3  
ACTR6  
ACTR8  
ACTRT2  
ACVR1  
ACVR1B  
ACVR2B  
ACVRL1  
ACY1  
ACY3  
ACYP1  
ACYP2  
ADA  
ADAM11  
ADAM12  
ADAM15  
ADAM17  
ADAM19  
ADAM22  
ADAM23  
ADAM24  
ADAM6B  
ADAM9  
ADAMTS1  
ADAMTS14  
ADAMTS16  
ADAMTS17

THEM5  
TINAGL  
TMEM117  
TMEM132D  
TMEM178  
TNFRSF13C  
TNFRSF1B  
TPO  
TRAIP  
TRF  
TRH  
TRIM16  
TRIM38  
TRIM66  
TRIM7  
TRIML1  
TRPC7  
TRPM1  
TRPS1  
TSLP  
TTYH2  
TUBB2A  
TYRO3  
UBE2K  
UCP1  
UGCG  
USP46  
V1RH18  
VAX1  
VAX2  
VAX2OS1  
VEGFA  
VGLL2  
VIT  
WDR6  
WFDC2  
WFIKKN1  
WFIKKN2  
WIFI1  
WSCD2  
XAF1  
XM\_145358  
ZAN  
ZAP70  
ZBP1  
ZC3H12A  
ZFP148  
ZFP169  
ZFP295  
ZFP459  
ZFP516  
ZFP518  
ZFP526

CDK7  
CDKAL1  
CDKN1A  
CDKN2D  
CDO1  
CDS2  
CDYL2  
CEACAM20  
CEBPD  
CEBPE  
CELSR1  
CENPB  
CENPH  
CENPM  
CENPN  
CENTA1  
CENTB1  
CEP55  
CEP68  
CEPT1  
CETN2  
CETN3  
CETN4  
CFD  
CGA  
CGGBP1  
CHAF1B  
CHCHD1  
CHD2  
CHEK1  
CHID1  
CHKB  
CHRNA4  
CHRNA9  
CHST5  
CIB1  
CIRBP  
CITED2  
CITED4  
CKLF  
CKMT1  
CKMT2  
CLCN2  
CLCNKB  
CLDN3  
CLDN4  
CLEC11A  
CLGN  
CLN6  
CLYBL  
CMBL  
CMPK1  
CMTM5

ADAMTS19  
ADAMTS2  
ADAMTS20  
ADAMTS5  
ADAMTS7  
ADAMTS8  
ADAMTS9  
ADAMTSL1  
ADAMTSL2  
ADAMTSL4  
ADAMTSL5  
ADAP1  
ADAP2  
ADAR  
ADARB1  
ADARB2  
ADAT1  
ADAT3  
ADC  
ADCK1  
ADCK2  
ADCY1  
ADCY2  
ADCY3  
ADCY6  
ADCY7  
ADCY9  
ADD1  
ADD3  
ADH1  
ADH5  
ADH7  
ADHFE1  
ADI1  
ADIPOQ  
ADIPOR1  
ADIPOR2  
ADK  
ADM  
ADNP  
ADNP2  
ADORA1  
ADORA2B  
ADPGK  
ADPRHL1  
ADPRHL2  
ADRA1B  
ADRA1D  
ADRA2A  
ADRA2B  
ADRA2C  
ADRB1  
ADRB2

ZFP820  
ZFYVE28  
ZSCAN2  
ZSWIM5

CMTM6  
CMTM7  
CNDP2  
CNN3  
CNTR0B  
COASY  
COBL  
COG4  
COIL  
COL13A1  
COL16A1  
COL3A1  
COPS4  
COPS7A  
COPZ1  
COQ6  
COQ7  
CORO7  
COX1  
COX11  
COX17  
COX18  
COX2  
COX5A  
COX6C  
COX7A1  
COX7A2L  
COX8A  
CPA2  
CPD  
CPLX3  
CPNE9  
CPSF4L  
CPT1A  
CPT1B  
CPVL  
CREB5  
CREBL2  
CREG1  
CRTAC1  
CRXOS1  
CRY2  
CRYAB  
CRYZL1  
CSDE1  
CSF1  
CSGALNACT1  
CSL  
CSNK1E  
CSPG5  
CSR1P  
CSTF3  
CTBS

ADRB3  
ADRBK1  
ADRBK2  
ADSS  
AEBP1  
AEBP2  
AEN  
AES  
AF529169  
AFAP1L1  
AFAP1L2  
AFF1  
AFF3  
AFF4  
AFMID  
AFTPH  
AGAP1  
AGAP3  
AGBL3  
AGBL4  
AGFG1  
AGFG2  
AGGF1  
AGL  
AGPAT2  
AGPAT3  
AGPAT4  
AGPAT5  
AGPAT6  
AGPAT9  
AGPS  
AGRN  
AGRP  
AGTPBP1  
AGTRAP  
AGXT  
AHCTF1  
AHCY  
AHCYL1  
AHCYL2  
AHDC1  
AHI1  
AHNAK  
AHR  
AHRR  
AHSA1  
AI118078  
AI314180  
AI314831  
AI314976  
AI414108  
AI427809  
AI429214

CTH  
CTNNA1  
CTSA  
CTSD  
CUEDC1  
CUL7  
CUX1  
CXCR7  
CYBASC3  
CYC1  
CYHR1  
CYLC1  
CYP2C39  
CYP2S1  
CYP46A1  
CYP4F13  
CYP4F39  
CYP7B1  
D10BWG1070E  
D10BWG1364E  
D130020L05RIK  
D14ERTD668E  
D17WSU104E  
D19ERTD652E  
D330017J20RIK  
D330046F09RIK  
D430040L24RIK  
D4ERTD196E  
D5ERTD579E  
D630004A14RIK  
D730001G18RIK  
D730003I15RIK  
D730045A05RIK  
D730048J04RIK  
DACT1  
DAF2  
DALRD3  
DAP3  
DAPK1  
DBI  
DBT  
DCLK3  
DCP2  
DCTN4  
DCUN1D5  
DDAH2  
DDB1  
DDIT3  
DDIT4L  
DDX19A  
DDX26B  
DDX28  
DDX4

AI464131  
AI467606  
AI480653  
AI506816  
AI661453  
AI836003  
AI837181  
AI846148  
AI854703  
AI894139  
AICDA  
AIG1  
AIM1  
AIM1L  
AIM2  
AIPL1  
AIRN  
AJAP1  
AK1  
AK129341  
AK2  
AK3  
AK3L1  
AK5  
AK7  
AKAP1  
AKAP10  
AKAP11  
AKAP12  
AKAP13  
AKAP2  
AKAP5  
AKAP6  
AKAP7  
AKAP8  
AKAP9  
AKR1A4  
AKR1B10  
AKR1B3  
AKR1B8  
AKR1C20  
AKR1C21  
AKR1D1  
AKR7A5  
AKT1S1  
AKT2  
AKTIP  
ALAS1  
ALDH1A2  
ALDH1A3  
ALDH1B1  
ALDH1L1  
ALDH2



DDX50  
DDX58  
DDX59  
DEDD2  
DEF6  
DEFB35  
DENND2C  
DENND3  
DENND4B  
DERL2  
DET1  
DGKA  
DHX32  
DIAP1  
DIS3L  
DIXDC1  
DKK3  
DKKL1  
DLG2  
DLGAP3  
DLGAP4  
DLX1AS  
DMBT1  
DNA2  
DNAHC10  
DNAJB1  
DNAJB5  
DNAJC19  
DNAJC4  
DNAJC8  
DNALC4  
DNMBP  
DNPEP  
DOCK10  
DOCK5  
DPPA3  
DRAP1  
DSC2  
DTX1  
DUOX1  
DUSP1  
DUSP9  
DVL2  
DYNLT1  
DYNLT3  
DYX1C1  
E030011O05RIK  
E130016E03RIK  
E130018N17RIK  
E130202H07RIK  
E230001N04RIK  
E2F1  
E2F2

ALDH3A1  
ALDH4A1  
ALDH5A1  
ALDH7A1  
ALDH8A1  
ALDOA  
ALDOART2  
ALG1  
ALG10B  
ALG12  
ALG13  
ALG14  
ALG5  
ALG6  
ALG9  
ALK  
ALKBH1  
ALKBH5  
ALLC  
ALMS1  
ALOX12  
ALOX15  
ALOX5AP  
ALPK1  
ALPK3  
ALPL  
ALS2CL  
ALX3  
AMAC1  
AMBN  
AMD1  
AMD2  
AMDHD2  
AMHR2  
AMN1  
AMOTL1  
AMOTL2  
AMPD1  
AMPD3  
AMT  
AMTN  
AMZ1  
AMZ2  
ANAPC10  
ANAPC13  
ANAPC5  
ANAPC7  
ANG  
ANG2  
ANGEL1  
ANGEL2  
ANGPT2  
ANGPT4

E330016A19RIK  
E430016P22RIK  
E430024P14RIK  
EAR12  
EBI3  
ECH1  
ECM1  
EDC4  
EDF1  
EDG5  
EED  
EEF1A1  
EFEMP2  
EFHC1  
EFHD2  
EG212753  
EG229879  
EG234159  
EG238829  
EG245297  
EG245347  
EG271505  
EG333830  
EG382645  
EG385521  
EG432743  
EG434280  
EG434402  
EG434426  
EG434459  
EG545052  
EG545208  
EG546038  
EG546143  
EG547215  
EG620155  
EG622052  
EG624866  
EG625969  
EG626367  
EG627420  
EG627782  
EG628847  
EG629591  
EG638580  
EG653016  
EG665513  
EG665897  
EG666332  
EG666435  
EG666525  
EG666560  
EG667027

ANGPTL1  
ANGPTL2  
ANGPTL4  
ANK  
ANK1  
ANK2  
ANK3  
ANKFN1  
ANKHD1  
ANKLE1  
ANKRA2  
ANKRD1  
ANKRD10  
ANKRD11  
ANKRD12  
ANKRD13A  
ANKRD13C  
ANKRD16  
ANKRD17  
ANKRD23  
ANKRD28  
ANKRD33  
ANKRD33B  
ANKRD34A  
ANKRD35  
ANKRD43  
ANKRD44  
ANKRD45  
ANKRD46  
ANKRD50  
ANKRD55  
ANKRD56  
ANKRD58  
ANKRD6  
ANKRD9  
ANKS1  
ANKS1B  
ANKS3  
ANLN  
ANO10  
ANO2  
ANO6  
ANO9  
ANP32A  
ANP32B  
ANP32E  
ANTXR1  
ANTXRL  
ANUBL1  
ANXA1  
ANXA11  
ANXA2  
ANXA3

EG667179  
EG667483  
EG667489  
EG667802  
EG668730  
EG668804  
EGFBP2  
EGLN3  
EHD1  
EIF2A  
EIF2AK2  
EIF2AK3  
EIF2B1  
EIF2B4  
EIF2S2  
EIF2S3X  
EIF4A2  
ELA1  
ELOVL6  
ELOVL7  
EMP1  
EMP3  
ENG  
ENO1  
ENO2  
ENSMUSG00000049830  
ENSMUSG00000071543  
ENSMUSG00000073728  
ENSMUSG00000074379  
ENSMUSG00000075025  
EOMES  
EPHB3  
EPHX1  
EPM2AIP1  
EPN2  
ERAF  
ERBB2IP  
ERLIN1  
ERMN  
ERO1L  
ESD  
ESRRA  
ESRRB  
ESX1  
ETNK2  
ETV4  
EVI5L  
EXDL2  
EXOC3L  
EXT1  
EXTL1  
EZH2  
EZR

ANXA4  
ANXA6  
ANXA8  
AOAH  
AOX1  
AOX3  
AOX3L1  
AOX4  
AP1AR  
AP1B1  
AP1G1  
AP1G2  
AP1M1  
AP1M2  
AP1S1  
AP1S3  
AP2A2  
AP2B1  
AP2S1  
AP3B1  
AP3B2  
AP3D1  
AP3M2  
AP3S2  
AP4E1  
AP4S1  
APAF1  
APBA2  
APBB1  
APBB2  
APC  
APEX1  
APH1B  
APIP  
APITD1  
APLF  
APLN  
APLNR  
APLP1  
APLP2  
APOBEC1  
APOBEC2  
APOBEC3  
APOC1  
APOC4  
APOD  
APOE  
APOL7A  
APOM  
APOO  
APP  
APPBP2  
APPL2

F3  
F630043A04RIK  
FABP3  
FADS2  
FAF1  
FAH  
FAHD1  
FAHD2A  
FANCA  
FANCI  
FARS2  
FASTKD1  
FBLIM1  
FBN2  
FBP1  
FBP2  
FBXL3  
FBXL8  
FBXO15  
FBXO2  
FBXO24  
FBXO27  
FBXO36  
FBXO44  
FBXO45  
FBXO6  
FBXW10  
FDF1  
FDPS  
FDXR  
FECH  
FEM1B  
FERD3L  
FERMT3  
FERT2  
FETUB  
FEZ1  
FFAR2  
FGD1  
FGFR4  
FGG  
FHL1  
FHL4  
FIGNL1  
FKBP15  
FKBP5  
FKBP6  
FKBP7  
FKBP8  
FKBPL  
FLOT1  
FLOT2  
FMN1

AQP1  
AQP11  
AQP2  
AQP3  
AQP5  
AQP6  
AQP7  
AQP9  
AQR  
ARAP1  
ARAP3  
ARC  
ARF1  
ARF2  
ARF3  
ARF4  
ARF6  
ARFGAP1  
ARFGAP2  
ARFGAP3  
ARFGEF1  
ARFGEF2  
ARFIP1  
ARG2  
ARGLU1  
ARHGAP1  
ARHGAP10  
ARHGAP12  
ARHGAP15  
ARHGAP17  
ARHGAP18  
ARHGAP19  
ARHGAP21  
ARHGAP22  
ARHGAP23  
ARHGAP24  
ARHGAP25  
ARHGAP26  
ARHGAP27  
ARHGAP29  
ARHGAP5  
ARHGAP8  
ARHGAP9  
ARHGDIA  
ARHGEF1  
ARHGEF10  
ARHGEF10L  
ARHGEF11  
ARHGEF15  
ARHGEF16  
ARHGEF17  
ARHGEF18  
ARHGEF19

FNBP1  
FNDC3B  
FOXN4  
FOXRED1  
FRMD4A  
FRRS1  
FRY  
FRYL  
FSTL1  
FTHL17  
FTL1  
FTL2  
FTSJ1  
FUBP3  
FURIN  
FXR1  
FXYD2  
FXYD4  
FXYD6  
G0S2  
G6PC3  
GAA  
GABARAP  
GABARAPL2  
GABPB1  
GADD45A  
GADD45B  
GAL  
GALNT11  
GALNT6  
GALT  
GANAB  
GAS2  
GAS5  
GBAS  
GCAP3  
GCAT  
GCC1  
GCHFR  
GCM2  
GCNT2  
GCNT3  
GDF15  
GDI1  
GDI2  
GEMIN6  
GFM2  
GFRA3  
GGA1  
GGNBP1  
GGNBP2  
GGT1  
GGT5

ARHGEF3  
ARHGEF4  
ARHGEF7  
ARID1A  
ARID1B  
ARID3A  
ARID3B  
ARID3C  
ARID4A  
ARID5A  
ARID5B  
ARIH2  
ARL11  
ARL13B  
ARL14  
ARL15  
ARL3  
ARL4A  
ARL4C  
ARL4D  
ARL5A  
ARL6  
ARL6IP1  
ARL8B  
ARMC10  
ARMC2  
ARMC4  
ARMC6  
ARMC7  
ARMC8  
ARMC9  
ARMCX1  
ARNT2  
ARNTL  
ARPC1A  
ARPC1B  
ARPC2  
ARPC3  
ARPM1  
ARPP21  
ARRB1  
ARRB2  
ARRDC1  
ARRDC2  
ARRDC3  
ARSB  
ARSG  
ARSI  
ART2B  
ART5  
ARTN  
ARVCF  
AS3MT

GGT6  
GGTA1  
GINS2  
GIPC1  
GIPC2  
GJB3  
GJB5  
GJC1  
GLA  
GLCE  
GLI2  
GLIPR2  
GLO1  
GLOD4  
GLRX  
GM1335  
GM1611  
GM1631  
GM1964  
GM216  
GM24  
GM2A  
GM525  
GM555  
GM830  
GM867  
GM9  
GMEB1  
GMFG  
GMPR2  
GNA11  
GNA14  
GNA15  
GNAT3  
GNB1L  
GNB2  
GNB4  
GNE  
GNG2  
NGT2  
GNL3L  
GNPDA1  
GOT1  
GPBP1  
GPC4  
GPI1  
GPR124  
GPR133  
GPR160  
GPR20  
GPR56  
GPR83  
GPC5A

ASAH1  
ASAP1  
ASAP2  
ASAP3  
ASB1  
ASB10  
ASB13  
ASB14  
ASB15  
ASB17  
ASB18  
ASB2  
ASB4  
ASB6  
ASB7  
ASCC1  
ASCC2  
ASCC3  
ASCL1  
ASF1A  
ASH1L  
ASH2L  
ASL  
ASNS  
ASPA  
ASPH  
ASPHD2  
ASPM  
ASPRV1  
ASPSCR1  
ASRGL1  
ASS1  
ASTN2  
ASXL1  
ASXL2  
ATAD1  
ATAD2B  
ATAD4  
ATAD5  
ATCAY  
ATE1  
ATF1  
ATF2  
ATF3  
ATF6  
ATF7  
ATF7IP  
ATF7IP2  
ATG10  
ATG16L1  
ATG16L2  
ATG2B  
ATG4C

GPRC5B  
GPSN2  
GPT2  
GPX1  
GPX2  
GPX2-PS1  
GPX7  
GRAMD1A  
GRASP  
GRHL3  
GRIK4  
GRIN2C  
GRIP2  
GRN  
GRPEL1  
GRRP1  
GRTP1  
GSDMA1  
GSDMA2  
GSDMD  
GSS  
GSTA1  
GSTA2  
GSTA3  
GSTA4  
GSTZ1  
GTF2A2  
GTPBP1  
GTPBP6  
GTRGEO22  
GTSF1  
GYLTL1B  
GYS1  
H1F0  
H2-M10.1  
H2-M5  
H2AFX  
H2AFY2  
H2AFY3  
H6PD  
HADH  
HAGHL  
HAL  
HAP1  
HAPLN3  
HAT1  
HBB-BH1  
HBEGF  
HC  
HCFC2  
HDAC1  
HDAC6  
HDDC2

ATG5  
ATG7  
ATIC  
ATL2  
ATL3  
ATMIN  
ATN1  
ATOH1  
ATOH7  
ATOH8  
ATOX1  
ATP10D  
ATP11A  
ATP11B  
ATP11C  
ATP12A  
ATP13A1  
ATP13A2  
ATP13A3  
ATP1A1  
ATP1A2  
ATP1A3  
ATP1A4  
ATP1B1  
ATP1B2  
ATP1B3  
ATP2A2  
ATP2A3  
ATP2B1  
ATP2B2  
ATP2B3  
ATP2B4  
ATP2C1  
ATP2C2  
ATP4A  
ATP5A1  
ATP5C1  
ATP5E  
ATP5F1  
ATP5L  
ATP5S  
ATP6AP1L  
ATP6AP2  
ATP6V0A1  
ATP6V0A2  
ATP6V0B  
ATP6V0C  
ATP6V0D1  
ATP6V0D2  
ATP6V1A  
ATP6V1B1  
ATP6V1B2  
ATP6V1C1

HDDC3  
HEATR5B  
HEBP1  
HECTD3  
HEMK1  
HES1  
HEXIM2  
HFE  
HIATL1  
HIBADH  
HIBCH  
HIGD2A  
HINT3  
HIST1H2BP  
HIST2H2AA1  
HIST2H2BE  
HIST2H3C2  
HIVEP3  
HK1  
HMBS  
HMCN2  
HMG20A  
HMG20B  
HMGCL  
HNRNPL  
HOXA7  
HOXC13  
HOXD8  
HPDL  
HPS6  
HRASLS3  
HRB  
HS3ST6  
HS6ST1  
HSCB  
HSD17B1  
HSD17B10  
HSD17B7  
HSF2BP  
HSPA1A  
HSPA1B  
HSPA8  
HSPB8  
HTATIP2  
HUS1B  
HUWE1  
HYAL1  
HYLS1  
IAH1  
ICA1  
ICA1L  
ICAM1  
IDH1

ATP6V1D  
ATP6V1E1  
ATP6V1F  
ATP6V1H  
ATP7B  
ATP8A1  
ATP8A2  
ATP8B1  
ATP8B2  
ATP9A  
ATP9B  
ATPIF1  
ATRNL1  
ATXN1  
ATXN2L  
ATXN3  
ATXN7  
ATXN7L1  
ATXN7L3  
AU017455  
AU018091  
AU021034  
AU022252  
AU023871  
AU040320  
AU040829  
AU042651  
AUH  
AURKAIP1  
AURKB  
AUTS2  
AV249152  
AVEN  
AVPI1  
AVPR1A  
AW146154  
AW209491  
AW549877  
AW554918  
AW555464  
AXIN1  
AXIN2  
AXL  
AYM1  
AZI1  
AZIN1  
B230120H23RIK  
B230206F22RIK  
B230206H07RIK  
B230217C12RIK  
B230219D22RIK  
B230312A22RIK  
B330016D10RIK



IDH2  
IDH3A  
IDH3G  
IDI1  
IER3  
IER5L  
IFI30  
IFT172  
IFT52  
IFT57  
IGBP1  
IGF2  
IGFBP7  
IGH-V3660  
IGLL1  
IGSF21  
IGSF5  
IHH  
IL10  
IL13RA1  
IL17RC  
IL23A  
IL4I1  
ILDR1  
ILKAP  
IMMP2L  
IMPA2  
INHHA  
INHBB  
IPP  
IQCC  
IQCG  
IQGAP2  
IRF8  
IRF9  
ISLR2  
ISOC2B  
ITGA6  
ITPK1  
ITPKA  
IVNS1ABP  
JAK3  
JAKMIP1  
JAM2  
JUP  
KALRN  
KANK3  
KANK4  
KAZALD1  
KCNH3  
KCNJ12  
KCNK4  
KCNMB2

B3GALNT1  
B3GALNT2  
B3GALT1  
B3GALT5  
B3GALTL  
B3GNT1  
B3GNT2  
B3GNT3  
B3GNT5  
B3GNT7  
B3GNT8  
B3GNL1  
B430010I23RIK  
B430306N03RIK  
B4GALNT1  
B4GALNT2  
B4GALNT3  
B4GALNT4  
B4GALT1  
B4GALT3  
B4GALT5  
B4GALT6  
B830017H08RIK  
B930041F14RIK  
BACE1  
BACE2  
BACH1  
BACH2  
BAD  
BAG3  
BAHCC1  
BAHD1  
BAI1  
BAI2  
BAI3  
BAIAP2  
BAIAP2L1  
BAK1  
BAMBI  
BANF1  
BANF2  
BARD1  
BARX1  
BARX2  
BASP1  
BAT1A  
BAT2D  
BAT2L  
BAT3  
BATF3  
BAX  
BAZ1A  
BAZ2A

KCNS3  
KCTD1  
KCTD19  
KCTD6  
KCTD7  
KCTD9  
KDELC2  
KDELR3  
KDR  
KEAP1  
KIF22  
KIF3C  
KIFC1  
KIFC2  
KIFC3  
KIRREL2  
KIRREL3  
KIT  
KLB  
KLF2  
KLF4  
KLHDC7A  
KLHDC9  
KLHL10  
KLK1  
KLK1B1  
KLK1B24  
KLK1B26  
KLK1B3  
KLK1B5  
KLK1B9  
KLK8  
KLKB1  
KLRG2  
KNDC1  
KNG1  
KNTC1  
KRCC1  
KRT23  
KRT42  
KRT7  
KRT8  
KRTAP8-2  
KTELC1  
LACTB2  
LAGE3  
LAMA1  
LAMB3  
LAMC2  
LAMP1  
LAP3  
LAPTM5  
LASP1

BAZ2B  
BB014433  
BB123696  
BBC3  
BBS10  
BBS12  
BBS2  
BBS5  
BBS9  
BBX  
BC002163  
BC002230  
BC003266  
BC003267  
BC003331  
BC004004  
BC005561  
BC005764  
BC006965  
BC011426  
BC013529  
BC016201  
BC016495  
BC017158  
BC017612  
BC017647  
BC018465  
BC018473  
BC018507  
BC020535  
BC021614  
BC021785  
BC021891  
BC022687  
BC023744  
BC024139  
BC024479  
BC025920  
BC026439  
BC026585  
BC027231  
BC027344  
BC028528  
BC030307  
BC030336  
BC030476  
BC030500  
BC030867  
BC031353  
BC031441  
BC031781  
BC032203  
BC048403

LCK  
LDHAL6B  
LDHB  
LDHC  
LDLR  
LEPROT  
LETMD1  
LGALS2  
LGALS3  
LGALS8  
LGALS9  
LGMN  
LHX3  
LIAS  
LINGO1  
LIPM  
LITAF  
LIX1  
LIX1L  
LLGL2  
LMOD3  
LNPEP  
LOC100043424  
LOC208428  
LOC218997  
LOC219102  
LOC219180  
LOC227920  
LOC228124  
LOC232745  
LOC235509  
LOC237547  
LOC238756  
LOC240160  
LOC241715  
LOC245350  
LOC269292  
LOC270362  
LOC278757  
LOC380728  
LOC381355  
LOC382468  
LOC382545  
LOC382741  
LOC383050  
LOC383570  
LOC383603  
LOC384229  
LOC384978  
LOC386426  
LOC432596  
LOC432831  
LOC432848

BC048507  
BC049349  
BC049807  
BC050777  
BC052040  
BC055111  
BC057022  
BC057079  
BC059842  
BC060267  
BC061194  
BC066028  
BC066135  
BC067068  
BC068281  
BC089491  
BCAM  
BCAN  
BCAP29  
BCAP31  
BCAR1  
BCAR3  
BCAS1  
BCAS2  
BCAS3  
BCAT1  
BCAT2  
BCDIN3D  
BCHE  
BCKDHA  
BCKDHB  
BCL11A  
BCL11B  
BCL2A1C  
BCL2L1  
BCL2L10  
BCL2L11  
BCL2L14  
BCL2L2  
BCL3  
BCL6  
BCL7A  
BCL7B  
BCL9  
BCL9L  
BCLAF1  
BCMO1  
BCOR  
BCORL1  
BCR  
BDH1  
BDKRB1  
BDKRB2

LOC433500  
LOC433944  
LOC434061  
LOC434156  
LOC434169  
LOC435250  
LOC435657  
LOC435752  
LOC435875  
LOC435963  
LOC544808  
LOC545261  
LOC545785  
LOC546500  
LOC546736  
LOC546886  
LOC621487  
LOC621842  
LOC622356  
LOC623572  
LOC624367  
LOC624724  
LOC628133  
LOC628602  
LOC628850  
LOC632296  
LOC632985  
LOC635340  
LOC637800  
LOC637900  
LOC638112  
LOC640324  
LOC640665  
LOC664999  
LOC665232  
LOC665814  
LOC666583  
LOC667036  
LOC667672  
LOC669236  
LOC670325  
LOC670403  
LOC670457  
LOC670838  
LOC670845  
LOC671039  
LOC671464  
LOC671478  
LOC671520  
LOC671913  
LOC672238  
LOC672365  
LOC672650

BDNF  
BEGAIN  
BEND3  
BEND4  
BEND5  
BEND6  
BEND7  
BEST1  
BEST3  
BET1L  
BET3L  
BFAR  
BFSP1  
BFSP2  
BHLHA9  
BHLHE22  
BHLHE23  
BHLHE40  
BHLHE41  
BHMT  
BHMT2  
BICD1  
BICD2  
BIN1  
BIN3  
BIRC2  
BIRC3  
BIRC6  
BIVM  
BLCAP  
BLK  
BLM  
BLMH  
BLNK  
BLOC1S3  
BLVRA  
BMF  
BMP1  
BMP10  
BMP2K  
BMP4  
BMP5  
BMP6  
BMP7  
BMP8A  
BMP8B  
BMPR1B  
BMPR2  
BNC2  
BNIP3L  
BOC  
BOD1  
BOK

LOC673378  
LOC673638  
LOC674900  
LOC675151  
LOC675992  
LOC676330  
LOC676847  
LOC677341  
LONRF1  
LONRF2  
LONRF3  
LOXL4  
LPIN1  
LPIN2  
LPL  
LRCH4  
LRP1  
LRP3  
LRRC2  
LRRC27  
LRRC28  
LRRC29  
LRRC34  
LRRC49  
LRRC56  
LRRC61  
LRRC8A  
LRRC9  
LRRN2  
LRRN3  
LTB4R1  
LY6G6E  
LY6K  
LY75  
LYCAT  
LYN  
LYPLA3  
LYRM2  
LYSMD4  
LZTFL1  
M6PRBP1  
MACROD1  
MAD2L2  
MAGED2  
MAGOH  
MAN2B1  
MANBA  
MAP2K6  
MAP3K10  
MAP3K9  
MAP4K1  
MBC2  
MBD6

BOLA1  
BOLA2  
BOLL  
BOP1  
BPTF  
BRCA1  
BRCC3  
BRD1  
BRD2  
BRD3  
BRD4  
BRD9  
BRDT  
BRE  
BRI3  
BRI3BP  
BRIP1  
BRP16  
BRP44L  
BRPF1  
BRPF3  
BRSK2  
BRUNOL4  
BRUNOL5  
BRWD1  
BSCL2  
BSDC1  
BSN  
BSND  
BSPRY  
BST1  
BSX  
BTAF1  
BTBD10  
BTBD11  
BTBD12  
BTBD16  
BTBD17  
BTBD2  
BTBD3  
BTBD6  
BTBD7  
BTBD9  
BTC  
BTD  
BTF3  
BTG1  
BTG2  
BTG3  
BTLA  
BTN1A1  
BTN2A2  
BTNL1

MBOAT5  
MCAM  
MCCC1  
MCEE  
MCF2  
MCM8  
MCTS2  
MDGA1  
MDM4  
MED19  
MED21  
MEI1  
MEST  
METT5D1  
METTL5  
METTL9  
MFGE8  
MFI2  
MFN1  
MGL2  
MIA1  
MICALL2  
MIF4GD  
MINK1  
MKRN2  
MKS1  
MLANA  
MLF2  
MLXIPL  
MLYCD  
MMAA  
MMD  
MMD2  
MME  
MMP11  
MMP23  
MMP9  
MMRN2  
MNAT1  
MOBKL2A  
MOBKL2C  
MOBKL3  
MOCOS  
MOCS2  
MORC4  
MORN3  
MOV10  
MPZL2  
MRAS  
MRE11A  
MRPL1  
MRPL14  
MRPL2

BTRC  
BUB1  
BUB1B  
BUB3  
BUD13  
BZW2  
C030002C11RIK  
C030017K20RIK  
C030034L19RIK  
C030039L03RIK  
C030044B11RIK  
C130026L21RIK  
C130039O16RIK  
C130071C03RIK  
C130074G19RIK  
C130079G13RIK  
C1D  
C1GALT1  
C1QB  
C1QL1  
C1QL2  
C1QTNF2  
C1QTNF3  
C1QTNF4  
C1QTNF9  
C1RB  
C1RL  
C2  
C230035I16RIK  
C230081A13RIK  
C230096C10RIK  
C2CD2  
C2CD2L  
C2CD3  
C2CD4B  
C2CD4C  
C330005M16RIK  
C330007P06RIK  
C330016O10RIK  
C330019L16RIK  
C330021F23RIK  
C330023M02RIK  
C330024D21RIK  
C430004E15RIK  
C530005A16RIK  
C530008M17RIK  
C630004H02RIK  
C730027P07RIK  
C77080  
C77370  
C80913  
C85492  
C86187

MRPL32  
MRPL36  
MRPL41  
MRPL45  
MRPL52  
MRPL55  
MRPS14  
MRPS16  
MRPS18C  
MRPS36  
MS4A1  
MSLN  
MSN  
MST1  
MST1R  
MT1  
MT2  
MTAP1A  
MTAP7  
MTERFD3  
MTHFD1  
MTIF2  
MTMR3  
MTMR7  
MTR  
MTRF1  
MTRF1L  
MTTP  
MUS81  
MUT  
MVK  
MVP  
MYH13  
MYH14  
MYH15  
MYL4  
MYLC2B  
MYLPF  
MYO10  
MYO1C  
MYO1F  
MYO1G  
MYO5C  
MYOM2  
MYOT  
MYST4  
N4BP1  
NAGA  
NAGK  
NAGLU  
NAGS  
NAIF1  
NANOG

C86695  
C87436  
C8B  
CAB39  
CAB39L  
CABC1  
CABIN1  
CABLES1  
CABLES2  
CABP1  
CABP2  
CABP7  
CABYR  
CACHD1  
CACNA1A  
CACNA1B  
CACNA1C  
CACNA1D  
CACNA1E  
CACNA1G  
CACNA1S  
CACNA2D1  
CACNA2D2  
CACNA2D3  
CACNB1  
CACNB2  
CACNB3  
CACNG2  
CACNG3  
CACNG4  
CACNG5  
CACNG6  
CACNG7  
CACNG8  
CACYBP  
CADM1  
CADM2  
CADM3  
CADM4  
CADPS  
CADPS2  
CALB2  
CALCOCO1  
CALCOCO2  
CALCRL  
CALD1  
CALHM2  
CALM1  
CALM2  
CALML3  
CALML4  
CALR4  
CALU

NAPG  
NAPSA  
NARFL  
NARS  
NAT11  
NAT13  
NAT9  
NCAM1  
NCF1  
NCF4  
NCOA4  
NCOA6  
NDG2  
NDRG1  
NDRG3  
NDUFA13  
NDUFA6  
NDUFA8  
NDUFB11  
NDUFB3  
NDUFB4  
NDUFB5  
NDUFV1  
NEFL  
NEK6  
NEK8  
NEURL2  
NEUROD1  
NF2  
NFATC2IP  
NFE2L2  
NFKBIA  
NFKBIL2  
NFU1  
NG23  
NGFRAP1  
NHLRC3  
NID1  
NKAIN4  
NKIRAS2  
NKX6-3  
NLR3  
NLRP4C  
NLRP4F  
NMNAT3  
NMU  
NNMT  
NOL3  
NOS3  
NOSIP  
NOTCH1  
NOTCH4  
NPC2

CALY  
CAMK1  
CAMK1D  
CAMK2A  
CAMK2B  
CAMK2D  
CAMK2G  
CAMK2N1  
CAMK4  
CAMKK2  
CAMKV  
CAMSAP1  
CAMSAP1L1  
CAMTA1  
CAND1  
CAND2  
CANT1  
CANX  
CAP1  
CAP2  
CAPG  
CAPN1  
CAPN10  
CAPN11  
CAPN13  
CAPN2  
CAPN5  
CAPN8  
CAPNS1  
CAPRIN1  
CAPRIN2  
CAPSL  
CAPZA2  
CAPZB  
CAR10  
CAR12  
CAR13  
CAR14  
CAR3  
CAR6  
CAR7  
CAR8  
CAR9  
CARD11  
CARD14  
CARHSP1  
CARKD  
CARM1  
CARTPT  
CASC1  
CASC3  
CASP3  
CASP6



NPCD  
NPDC1  
NPEPPS  
NPPB  
NPR1  
NPR3  
NQO1  
NQO2  
NR2C2AP  
NRARP  
NRCAM  
NRM  
NSDHL  
NSG2  
NSMCE4A  
NSUN4  
NSUN6  
NT5C3L  
NT5DC1  
NT5DC3  
NTF5  
NTHL1  
NUBP2  
NUBPL  
NUDCD1  
NUDT1  
NUDT13  
NUDT16L1  
NUDT2  
NUDT4  
NUP155  
NUP62  
NUP62CL  
NUP85  
NUPR1  
OAF  
OAS2  
OASL1  
OAZ2  
OCR1  
OGG1  
OGT  
OLFR1040  
OLFR1109  
OLFR1239  
OLFR1264  
OLFR1268-PS1  
OLFR1384  
OLFR1428  
OLFR1475  
OLFR1491  
OLFR309  
OLFR361

CASP8AP2  
CASQ1  
CASQ2  
CASR  
CASS4  
CAST  
CASZ1  
CATSPER1  
CATSPER3  
CATSPERG1  
CATSPERG2  
CBARA1  
CBFA2T2  
CBFA2T3  
CBFB  
CBLB  
CBLC  
CBR1  
CBR3  
CBR4  
CBS  
CBX2  
CBX3  
CBX4  
CBX5  
CBX6  
CBX6-NPTXR  
CBX7  
CBX8  
CC2D1B  
CCAR1  
CCBE1  
CCBL2  
CCDC101  
CCDC105  
CCDC108  
CCDC109A  
CCDC110  
CCDC112  
CCDC113  
CCDC114  
CCDC115  
CCDC117  
CCDC12  
CCDC121  
CCDC124  
CCDC125  
CCDC126  
CCDC129  
CCDC130  
CCDC132  
CCDC134  
CCDC135

|                    |         |
|--------------------|---------|
| OLFR458            | CCDC136 |
| OLFR478            | CCDC138 |
| OLFR594            | CCDC14  |
| OLFR606            | CCDC146 |
| OLFR891            | CCDC147 |
| OMA1               | CCDC148 |
| OOEP               | CCDC155 |
| OPLAH              | CCDC160 |
| ORC3L              | CCDC19  |
| ORC6L              | CCDC25  |
| OSBPL7             | CCDC28A |
| OSGEPL1            | CCDC3   |
| OSGIN1             | CCDC30  |
| OSTA               | CCDC33  |
| OSTF1              | CCDC34  |
| OTTMUSG0000000712  | CCDC37  |
| OTTMUSG00000007018 | CCDC38  |
| OTTMUSG00000010009 | CCDC39  |
| OTTMUSG00000015351 | CCDC40  |
| OTTMUSG00000018358 | CCDC44  |
| OTTMUSG00000020946 | CCDC45  |
| OXNAD1             | CCDC46  |
| P2RX5              | CCDC47  |
| P2RY5              | CCDC48  |
| PABPC3             | CCDC50  |
| PADI2              | CCDC51  |
| PADI4              | CCDC54  |
| PADI6              | CCDC55  |
| PAFAH1B1           | CCDC57  |
| PANK1              | CCDC6   |
| PAPD4              | CCDC60  |
| PAQR4              | CCDC61  |
| PAQR7              | CCDC62  |
| PARP1              | CCDC63  |
| PARP2              | CCDC64  |
| PASK               | CCDC66  |
| PBP2               | CCDC67  |
| PBX2               | CCDC68  |
| PBX4               | CCDC70  |
| PCCA               | CCDC71  |
| PCCB               | CCDC72  |
| PCDHGC5            | CCDC73  |
| PCK2               | CCDC75  |
| PCM1               | CCDC76  |
| PCOLCE             | CCDC77  |
| PCYOX1L            | CCDC8   |
| PCYT1A             | CCDC83  |
| PDE8A              | CCDC84  |
| PDGFC              | CCDC85A |
| PDHB               | CCDC85C |
| PDK3               | CCDC87  |
| PDLIM2             | CCDC88C |
| PDXK               | CCDC9   |

PDXP  
PDZD11  
PDZRN4  
PEBP1  
PECAM1  
PECR  
PEG12  
PEPD  
PER1  
PEX11B  
PEX11C  
PEX13  
PFDN4  
PFDN5  
PFKFB1  
PFKFB3  
PFKL  
PFKP  
PGAM2  
PGBD5  
PGC  
PGM1  
PGPEP1  
PGRMC1  
PHF1  
PHF11  
PHF19  
PHF20  
PHLDA1  
PHYH  
PHYHD1  
PI4K2B  
PIAS2  
PIAS3  
PIAS4  
PIB5PA  
PIGA  
PIGC  
PIGK  
PIGP  
PIK3IP1  
PIM1  
PIN1  
PIN4  
PINC  
PIP4K2C  
PIR  
PJA2  
PKM2  
PKN1  
PKNOX1  
PKNOX2  
PKP3

CCDC90A  
CCDC91  
CCDC92  
CCDC93  
CCDC96  
CCDC97  
CCDC99  
CCHCR1  
CCK  
CCKAR  
CCKBR  
CCL1  
CCL17  
CCL22  
CCL25  
CCM2  
CCNA1  
CCNA2  
CCNB1  
CCNB1IP1  
CCNC  
CCND1  
CCND2  
CCND3  
CCNE1  
CCNE2  
CCNF  
CCNG1  
CCNG2  
CCNH  
CCNJL  
CCNL1  
CCNL2  
CCNT2  
CCNY  
CCNYL1  
CCPG1  
CCR10  
CCR4  
CCR6  
CCR7  
CCR9  
CCRK  
CCRL1  
CCRN4L  
CCS  
CCT2  
CCT4  
CCT5  
CCT7  
CCT8  
CCT8L1  
CD14

PLA2G2C  
PLA2G2E  
PLA2G4B  
PLA2G4E  
PLA2G7  
PLAA  
PLAUR  
PLCG2  
PLEC1  
PLEKHA2  
PLEKHA6  
PLEKHA7  
PLEKHG6  
PLEKHH1  
PLEKHO2  
PLK3  
PLOD1  
PLSCR1  
PLSCR2  
PLSCR4  
PLTP  
PLXDC1  
PLXNA2  
PLXNB2  
PMEPA1  
PMVK  
PNCK  
PNKD  
PNPLA3  
PNPLA6  
PODNL1  
POLD4  
POLI  
POLQ  
POLR2G  
POLR2K  
POLR3GL  
POMT1  
PPAP2A  
PPARD  
PPARGC1B  
PPCDC  
PPFIA4  
PPM1J  
PPP1R10  
PPP1R11  
PPP1R14D  
PPP1R3C  
PPP2R2A  
PPP2R2C  
PPP2R4  
PPP2R5A  
PPP2R5C

CD151  
CD164  
CD164L2  
CD180  
CD1D2  
CD2  
CD209F  
CD22  
CD247  
CD248  
CD24A  
CD274  
CD276  
CD28  
CD2AP  
CD2BP2  
CD300A  
CD300C  
CD300E  
CD300LB  
CD300LG  
CD320  
CD33  
CD34  
CD37  
CD38  
CD4  
CD40  
CD47  
CD5  
CD55  
CD59A  
CD63  
CD68  
CD69  
CD70  
CD72  
CD79A  
CD79B  
CD80  
CD83  
CD84  
CD8B1  
CD9  
CD93  
CD96  
CD97  
CDA  
CDADC1  
CDAN1  
CDC123  
CDC14A  
CDC14B

PPP3CC  
PPWD1  
PQLC1  
PRAF2  
PRDM10  
PRDM14  
PRDM16  
PRDX1  
PRELID1  
PRELID2  
PRICKLE2  
PRICKLE4  
PRIM1  
PRIM2  
PRKAG1  
PRKAR2A  
PRKCZ  
PRMT6  
PRMT8  
PROC  
PROS1  
PRPF18  
PRPF31  
PRPF38A  
PRPH  
PRPSAP2  
PRR13  
PRRC1  
PRRX2  
PRSS36  
PSMB7  
PSMC3IP  
PSMD11  
PSMD13  
PSMD2  
PSMD5  
PSMD7  
PSMD8  
PSPH  
PTGES  
PTGIS  
PTPN11  
TPRN  
TPRV  
PTRF  
PXN  
PYCR1  
QARS  
QK  
QPCTL  
QSOX2  
RAB1B  
RAB27A

CDC16  
CDC20  
CDC23  
CDC25A  
CDC25C  
CDC27  
CDC2A  
CDC2L5  
CDC2L6  
CDC37  
CDC42BPA  
CDC42BPB  
CDC42EP1  
CDC42EP2  
CDC42EP3  
CDC42EP4  
CDC42EP5  
CDC42SE1  
CDC42SE2  
CDC45L  
CDC6  
CDC7  
CDC73  
CDCA4  
CDCA7  
CDCA8  
CDCP1  
CDGAP  
CDH1  
CDH10  
CDH12  
CDH13  
CDH16  
CDH2  
CDH22  
CDH23  
CDH26  
CDH29  
CDH3  
CDH4  
CDH5  
CDH6  
CDK2AP1  
CDK2AP2  
CDK5R2  
CDK5RAP1  
CDK5RAP2  
CDK5RAP3  
CDK6  
CDK7  
CDKAL1  
CDKL1  
CDKL2

RAB27B  
RAB35  
RAB4B  
RABAC1  
RABGEF1  
RABGGTB  
RAD51L1  
RAD9  
RAD9B  
RAF1  
RAG1AP1  
RAGE  
RALB  
RAP2A  
RAPGEF3  
RARG  
RASA4  
RBBP5  
RBP1  
RBPJ  
RBPMS2  
RC3H2  
RCE1  
RCN1  
RCOR1  
RDH11  
REEP5  
REL  
REN2  
REPS2  
RGN  
RGS14  
RHBDD1  
RHBDF2  
RHD  
RHEB  
RHOBTB2  
RHOC  
RHOV  
RHOX5  
RHOX6  
RIN1  
RIN3  
RLBP1  
RMI1  
RMND5B  
RNASEK  
RND1  
RND2  
RNF125  
RNF135  
RNF144B  
RNF17

CDKL3  
CDKL4  
CDKN1A  
CDKN1B  
CDKN1C  
CDKN2A  
CDKN2AIP  
CDKN3  
CDNF  
CDO1  
CDON  
CDRT4  
CDS1  
CDS2  
CDSN  
CDT1  
CDV3  
CDX1  
CDX2  
CDX4  
CDYL  
CDYL2  
CEACAM10  
CEACAM15  
CEACAM2  
CEACAM9  
CEBPA  
CEBPB  
CEBPD  
CEBPE  
CEBPG  
CEBPZ  
CECR2  
CECR5  
CECR6  
CELA1  
CELA2A  
CELA3B  
CELSR1  
CELSR2  
CELSR3  
CENPB  
CENPF  
CENPJ  
CENPK  
CENPM  
CENPQ  
CENPT  
CENPV  
CEP120  
CEP135  
CEP170  
CEP250

RNF181  
RNGTT  
ROD1  
ROPN1L  
RP23-136K12.4  
RP23-248K2.4  
RP23-304I1.3  
RP23-54E4.8  
RPA3  
RPAIN  
RPAP1  
RPL10A  
RPL17  
RPL22  
RPL26  
RPL3  
RPL36AL  
RPL39  
RPL7L1  
RPL8  
RPP25  
RPS15A  
RPS3A  
RPS8  
RPSA  
RRAS  
RRM1  
RRM2  
RRM2B  
RRP9  
RTKN  
RTKN2  
RTN1  
RUNX1  
RUSC2  
RWDD1  
RWDD3  
RYR1  
RYR2  
S100A1  
S100A13  
S100A6  
SAA1  
SAA3  
SASH3  
SAT2  
SC4MOL  
SCAPER  
SCARB1  
SCARB2  
SCARF1  
SCD1  
SCGB1C1

CEP290  
CEP55  
CEP63  
CEP68  
CEP70  
CEP76  
CEP78  
CEP97  
CEPT1  
CERK  
CERKL  
CES1  
CETN2  
CETN3  
CETN4  
CFDP1  
CFL1  
CFL2  
CFLAR  
CFTR  
CGA  
CGGBP1  
CGNL1  
CHAD  
CHADL  
CHAF1B  
CHCHD3  
CHCHD5  
CHCHD6  
CHD1L  
CHD2  
CHD5  
CHD6  
CHD7  
CHD9  
CHGB  
CHI3L1  
CHIC2  
CHID1  
CHIT1  
CHKA  
CHKB-CPT1B  
CHL1  
CHMP1B  
CHMP2A  
CHMP2B  
CHMP4B  
CHMP4C  
CHMP6  
CHMP7  
CHN1  
CHN2  
CHORDC1

SCGB3A1  
SCHIP1  
SCN7A  
SCNN1A  
SCP2  
SCRN1  
SCUBE2  
SCYE1  
SDCBP  
SDCBP2  
SDF2  
SDHC  
SDHD  
SEC22A  
SELENBP1  
SELENBP2  
SELM  
SEMA4A  
SEMA5B  
SENP3  
SEPX1  
SERHL  
SERINC2  
SERPINB1A  
SERPINB1C  
SERPINB6A  
SERPINB6C  
SERPINE1  
SERPING1  
SERPINH1  
SERTAD2  
SERTAD3  
SFN  
SFRP1  
SFRS7  
SFRS9  
SFT2D3  
SFXN4  
SGCB  
SGCD  
SH2D4A  
SH2D4B  
SH3BP1  
SH3TC1  
SH3TC2  
SHE  
SHISA4  
SHKBP1  
SHMT1  
SIAH1A  
SIP1  
SIRPA  
SIRT3

CHPT1  
CHRAC1  
CHRD  
CHRD2  
CHRM1  
CHRM3  
CHRM4  
CHRNA1  
CHRNA4  
CHRNA7  
CHRNA9  
CHRNB1  
CHRNB2  
CHRNB3  
CHRNB4  
CHRNG  
CHST10  
CHST11  
CHST12  
CHST13  
CHST14  
CHST15  
CHST2  
CHST3  
CHST5  
CHST8  
CHSY3  
CHTF8  
CHUK  
CIAPIN1  
CIB2  
CIC  
CIDEA  
CIITA  
CILP  
CIRBP  
CIRH1A  
CISD1  
CIT  
CITED2  
CITED4  
CIZ1  
CK137956  
CKAP2L  
CKAP4  
CKAP5  
CKB  
CKLF  
CKM  
CKMT1  
CKS1B  
CKS2  
CLASP1



SIRT5  
SKAP2  
SKP2  
SLC11A1  
SLC15A1  
SLC16A9  
SLC22A18  
SLC22A20  
SLC22A7  
SLC23A2  
SLC25A1  
SLC25A11  
SLC25A13  
SLC25A16  
SLC25A19  
SLC25A2  
SLC25A20  
SLC25A36  
SLC25A39  
SLC25A4  
SLC25A43  
SLC26A6  
SLC27A3  
SLC29A1  
SLC2A5  
SLC2A6  
SLC2A8  
SLC30A10  
SLC30A2  
SLC30A3  
SLC31A1  
SLC34A3  
SLC35B1  
SLC35B2  
SLC35E4  
SLC37A4  
SLC38A4  
SLC39A4  
SLC44A1  
SLC44A3  
SLC44A4  
SLC4A11  
SLC4A3  
SLC6A1  
SLC6A3  
SLC6A8  
SLC7A1  
SLC7A5  
SLC7A6OS  
SLC7A8  
SLC9A1  
SLC9A8  
SLCO2A1

CLASP2  
CLCA3  
CLCC1  
CLCF1  
CLCN2  
CLCN3  
CLCN6  
CLDN10A  
CLDN14  
CLDN18  
CLDN2  
CLDN23  
CLDN3  
CLDN4  
CLDN5  
CLDN7  
CLDN9  
CLDND1  
CLEC11A  
CLEC12A  
CLEC16A  
CLEC2D  
CLEC2L  
CLEC3A  
CLGN  
CLIC1  
CLIC4  
CLIC6  
CLINT1  
CLIP1  
CLIP2  
CLIP3  
CLMN  
CLN5  
CLN6  
CLN8  
CLNK  
CLNS1A  
CLOCK  
CLPB  
CLPS  
CLPX  
CLSTN1  
CLSTN2  
CLSTN3  
CLTA  
CLTB  
CLTC  
CLVS1  
CLYBL  
CMA2  
CMAH  
CMAS

SLCO4A1  
SLFN9  
SLIT2  
SMAD7  
SMARCC2  
SMARCD2  
SMARCD3  
SMC1B  
SMC5  
SMCR7  
SMG7  
SMTNL2  
SMYD4  
SNAP91  
SNF1LK  
SNHG6  
SNRPA1  
SNRPD1  
SNRPF  
SNX1  
SNX17  
SNX20  
SNX6  
SOCS2  
SOD2  
SOX17  
SOX21  
SPA17  
SPARC  
SPATA17  
SPATS1  
SPDEF  
SPG21  
SPG3A  
SPHK1  
SPIB  
SPIC  
SPIN4  
SPINT1  
SPINT2  
SPNS3  
SPP1  
SPRYD4  
SRC  
SRGAP2  
SRP14  
SRR  
SRRM1  
SRXN1  
SSB  
SSBP4  
SSNA1  
ST3GAL1

CMBL  
CMKLR1  
CML2  
CMTM3  
CMTM4  
CMTM7  
CMTM8  
CNBP  
CNDP1  
CNDP2  
CNGA3  
CNIH3  
CNIH4  
CNKSR1  
CNKSR2  
CNKSR3  
CNN3  
CNNM2  
CNNM4  
CNOT1  
CNOT10  
CNOT2  
CNOT4  
CNOT6  
CNOT8  
CNPY1  
CNPY2  
CNPY3  
CNR1  
CNR2  
CNST  
CNTFR  
CNTN1  
CNTN2  
CNTN3  
CNTN4  
CNTN5  
CNTNAP2  
CNTNAP5C  
CNTROB  
COBL  
COBLL1  
COG1  
COG3  
COG5  
COG8  
COIL  
COL11A2  
COL12A1  
COL13A1  
COL14A1  
COL15A1  
COL16A1

ST8SIA1  
STAC3  
STAG3  
STAMBPL1  
STARD4  
STARD6  
STARD9  
STAT1  
STAT2  
STAT3  
STIP1  
STK22S1  
STK3  
STK36  
STK38  
STMN3  
STOML2  
STRA8  
STT3A  
STXBP5L  
SUCLA2  
SULT5A1  
SULT6B1  
SUMO1  
SUOX  
SUSD2  
SUV420H2  
SYCE2  
SYNGR2  
SYNGR4  
SYNPO2L  
SYT5  
TACC1  
TACC3  
TAF13  
TAF7  
TAGLN2  
TALDO1  
TARS  
TARS2  
TAS2R138  
TBC1D8  
TBCA  
TBL2  
TBX3  
TCEA1  
TCEAL7  
TCF19  
TCFAP2A  
TCFAP2C  
TCFCP2L1  
TCFEB  
TCL1

COL18A1  
COL19A1  
COL1A1  
COL23A1  
COL25A1  
COL28A1  
COL4A3BP  
COL5A1  
COL5A3  
COL6A1  
COL6A2  
COL9A1  
COL9A2  
COLEC11  
COLEC12  
COMMD1  
COMMD4  
COMMD5  
COMMD7  
COMP  
COMT1  
COPA  
COPB1  
COPG  
COPS3  
COPS4  
COPS7A  
COPS7B  
COPS8  
COQ10A  
COQ10B  
COQ5  
COQ7  
CORIN  
CORO1A  
CORO1B  
CORO1C  
CORO2B  
CORO6  
COTL1  
COX10  
COX11  
COX15  
COX4I1  
COX4I2  
COX5B  
COX6A1  
COX6B2  
COX7A1  
COX7A2  
COX7A2L  
COX7C  
COX8C

TCP11  
TCTEX1D2  
TDH  
TEAD2  
TEAD4  
TEF  
TEKT1  
TEKT2  
TERF2  
TERT  
TESC  
TET2  
TFF3  
TFPI  
TFRC  
TGFBI  
TGM1  
TGM2  
THNSL1  
THOP1  
THRAP3  
THRSP  
THTPA  
TICAM1  
TICAM2  
TIMM44  
TIMP1  
TIPARP  
TISP22  
TJAP1  
TJP3  
TK1  
TLE6  
TLL1  
TM4SF5  
TM7SF2  
TM7SF3  
TMBIM1  
TMCO4  
TMCO6  
TMED6  
TMEM102  
TMEM106A  
TMEM117  
TMEM120A  
TMEM126B  
TMEM136  
TMEM141  
TMEM14C  
TMEM161B  
TMEM166  
TMEM17  
TMEM179

CPA2  
CPA4  
CPA6  
CPD  
CPE  
CPEB1  
CPEB3  
CPEB4  
CPLX1  
CPLX2  
CPLX4  
CPM  
CPN1  
CPN2  
CPNE2  
CPNE4  
CPNE5  
CPNE8  
CPNE9  
CPSF4L  
CPSF6  
CPT1A  
CPT1B  
CPVL  
CPZ  
CR1L  
CR2  
CRABP1  
CRADD  
CRB2  
CRBN  
CREB1  
CREB3  
CREB3L1  
CREB3L2  
CREB5  
CREBBP  
CREBL2  
CREG1  
CRELD2  
CRHBP  
CRIP1  
CRIP2  
CRIP3  
CRIPT  
CRISPLD1  
CRISPLD2  
CRKRS  
CRLF1  
CRMP1  
CROCC  
CRP  
CRTAC1

TMEM19  
TMEM191C  
TMEM2  
TMEM205  
TMEM37  
TMEM39A  
TMEM51  
TMEM62  
TMEM63C  
TMEM64  
TMEM66  
TMEM8  
TMEM81  
TMEM82  
TMPRSS5  
TMSB4X  
TMTC4  
TMUB1  
TNIP1  
TNK1  
TNNC1  
TNRC18  
TOB1  
TOM1  
TOMM7  
TPD52L1  
TPI-RS4  
TPMT  
TPPP3  
TPST2  
TPT1  
TRAF3IP2  
TRAIP  
TRAM2  
TRAPPC5  
TRERF1  
TREX1  
TRF  
TRIAP1  
TRIB3  
TRIM13  
TRIM16  
TRIM25  
TRIM36  
TRIM47  
TRIM54  
TRIM55  
TRIM6  
TRIM63  
TRIM8  
TRIML1  
TRIML2  
TRP53I13

CRTAP  
CRX  
CRXOS1  
CRY2  
CRYAA  
CRYBA1  
CRYBA2  
CRYBB3  
CRYBG3  
CRYGN  
CRYGS  
CRYL1  
CRYZL1  
CSAD  
CSDE1  
CSF1  
CSF1R  
CSF2  
CSF3R  
CSGALNACT1  
CSGALNACT2  
CSK  
CSMD1  
CSMD3  
CSNK1A1  
CSNK1E  
CSNK1G3  
CSNK2A1  
CSNK2A2  
CSPG4  
CSPG5  
CSPP1  
CSRNP1  
CSRNP2  
CSRNP3  
CSRP1  
CSRP2  
CSRP2BP  
CST3  
CST6  
CST7  
CSTAD  
CSTB  
CSTF1  
CSTF2  
CSTF3  
CSTL1  
CTBP1  
CTBP2  
CTBS  
CTCF  
CTDP1  
CTDSP2

TRPD52L3  
TRPM7  
TSEN34  
TSFM  
TSGA14  
TSPAN1  
TSPAN32  
TSPO  
TTC19  
TTC25  
TTC28  
TTC35  
TTC4  
TTC7  
TTC9  
TTF1  
TLLL13  
TLLL6  
TUBA3A  
TUBB2A  
TUBB2B  
TUBB3  
TUBD1  
TUBG2  
TUG1  
TULP2  
TULP4  
TUSC1  
TXN1  
TXNDC14  
TXNIP  
TYSND1  
UAP1L1  
UBA1  
UBE2D3  
UBE2M  
UBE2W  
UBE4A  
UBN1  
UBQLN4  
UBTF  
UBXD5  
UCHL4  
UCHL5IP  
UCKL1  
UFC1  
UHRF1  
UNC13A  
UNC13B  
UNC13D  
UNC84B  
UPB1  
UPF1

CTDSPL  
CTF1  
CTGF  
CTH  
CTHRC1  
CTLA4  
CTNNA1  
CTNNA2  
CTNNA3  
CTNNAL1  
CTNNB1  
CTNNBIP1  
CTNNBL1  
CTNND1  
CTNND2  
CTR9  
CTRC  
CTSA  
CTSB  
CTSC  
CTSD  
CTSLL3  
CTTN  
CTTNBP2  
CTTNBP2NL  
CTXN1  
CTXN2  
CTXN3  
CUBN  
CUEDC1  
CUEDC2  
CUGBP2  
CUL1  
CUL2  
CUL4A  
CUL7  
CUTA  
CUX1  
CUX2  
CWC15  
CWH43  
CX3CL1  
CXADR  
CXCL12  
CXCL14  
CXCL16  
CXCL17  
CXCR3  
CXCR4  
CXCR5  
CXCR7  
CXXC5  
CYB5

UPP1  
UQCRB  
UQCRC1  
USE1  
USP11  
USP3  
USP48  
USP49  
UXS1  
V1RB7  
V1RH7  
VAMP2  
VASH1  
VASP  
VAT1  
VAX2  
VCAM1  
VDAC3  
VEGFA  
VEGFC  
VIM  
VMN2R10  
VPREB1  
VPREB3  
VPS11  
VPS13C  
VPS18  
VPS25  
VPS39  
VRK1  
VSIG2  
VSTM2L  
VWF  
WBP1  
WBP5  
WBSCR16  
WDR12  
WDR16  
WDR31  
WDR34  
WDR42A  
WDR5  
WDR51A  
WDR51B  
WDR57  
WDR5B  
WDR78  
WDR90  
WFDC15A  
WFDC2  
WIP11  
WIP12  
WNT10A

CYB561  
CYB561D1  
CYB5B  
CYB5R1  
CYB5R2  
CYB5R3  
CYBB  
CYBRD1  
CYCS  
CYFIP1  
CYFIP2  
CYGB  
CYHR1  
CYLC1  
CYP11A1  
CYP19A1  
CYP26A1  
CYP26B1  
CYP27A1  
CYP2A12  
CYP2AB1  
CYP2B10  
CYP2C37  
CYP2C55  
CYP2C69  
CYP2C70  
CYP2D12  
CYP2D22  
CYP2D9  
CYP2F2  
CYP2J9  
CYP2S1  
CYP2T4  
CYP2U1  
CYP3A13  
CYP4A10  
CYP4A31  
CYP4F13  
CYP4F16  
CYP4F18  
CYP4F39  
CYP4X1  
CYP8B1  
CYPT12  
CYR61  
CYS1  
CYTH1  
CYTH2  
CYTH3  
CYTH4  
CYTL1  
CYTSA  
CYTSB

WNT11  
WNT3A  
WNT6  
WSCD1  
WSCD2  
XKRX  
XPNPEP1  
XPNPEP2  
XRCC5  
YES1  
YIF1A  
YPEL2  
YWHAE  
ZADH1  
ZAP70  
ZBTB12  
ZBTB3  
ZBTB32  
ZBTB44  
ZBTB45  
ZC3H7A  
ZC3HAV1  
ZCCHC11  
ZCCHC4  
ZCCHC6  
ZCWPW1  
ZDHHHC14  
ZDHHHC17  
ZDHHHC3  
ZDHHHC4  
ZEB1  
ZFAND1  
ZFHX2  
ZFP1  
ZFP106  
ZFP286  
ZFP295  
ZFP367  
ZFP36L1  
ZFP383  
ZFP414  
ZFP42  
ZFP459  
ZFP516  
ZFP518B  
ZFP57  
ZFP639  
ZFP640  
ZFP650  
ZFP704  
ZFP750  
ZFP78  
ZFP811

D030018L15RIK  
D030028A08RIK  
D030074E01RIK  
D0H4S114  
D10627  
D10BWG1379E  
D10ERTD322E  
D10ERTD610E  
D10JHU81E  
D10WSU102E  
D10WSU52E  
D11BWG0517E  
D130009I18RIK  
D130040H23RIK  
D130043K22RIK  
D14ABB1E  
D14ERTD436E  
D14ERTD668E  
D15ERTD621E  
D15WSU169E  
D16ERTD472E  
D16H22S680E  
D17WSU92E  
D18ERTD653E  
D19ERTD386E  
D19WSU162E  
D1BWG0212E  
D1PAS1  
D230025D16RIK  
D230037D09RIK  
D2ERTD391E  
D330028D13RIK  
D330038O06RIK  
D3BWG0562E  
D430019H16RIK  
D430020J02RIK  
D430041D05RIK  
D430042O09RIK  
D4BWG0951E  
D4ERTD22E  
D4WSU53E  
D5ERTD579E  
D630003M21RIK  
D630029K05RIK  
D630032N06RIK  
D630037F22RIK  
D630039A03RIK  
D630042P16RIK  
D630045J12RIK  
D6ERTD474E  
D6WSU116E  
D6WSU163E  
D730001G18RIK



ZFP819  
ZFP87  
ZFP97  
ZHX2  
ZKSCAN2  
ZMAT2  
ZMAT4  
ZMYM3  
ZMYM6  
ZMYND15  
ZNHIT4  
ZNRD1  
ZRANB3

D730039F16RIK  
D730040F13RIK  
D7ERTD443E  
D8ERTD82E  
D930014E17RIK  
D930015E06RIK  
D930020B18RIK  
D930048N14RIK  
D9ERTD402E  
DAAM1  
DAB1  
DAB2  
DAB2IP  
DACH1  
DACT1  
DACT2  
DACT3  
DAD1  
DAG1  
DAGLA  
DAGLB  
DAND5  
DAO  
DAP  
DAP3  
DAPK1  
DAPL1  
DAPP1  
DARS  
DAXX  
DAZAP1  
DAZAP2  
DAZL  
DBI  
DBNL  
DBP  
DBPHT2  
DBR1  
DBX1  
DCAF11  
DCAF12  
DCAF4  
DCAF6  
DCAF7  
DCAF8  
DCAKD  
DCBLD1  
DCC  
DCDC2A  
DCI  
DCK  
DCLK1  
DCLK2

DCLK3  
DCLRE1A  
DCP1A  
DCP1B  
DCPS  
DCST1  
DCT  
DCTD  
DCTN1  
DCTN2  
DCTN4  
DCTN6  
DCUN1D3  
DDAH1  
DDAH2  
DDB1  
DDB2  
DDC  
DDHD1  
DDHD2  
DDIT4  
DDN  
DDOST  
DDR1  
DDRGK1  
DDT  
DDX10  
DDX11  
DDX20  
DDX26B  
DDX28  
DDX3X  
DDX3Y  
DDX46  
DDX49  
DDX5  
DDX54  
DDX58  
DDX59  
DDX6  
DEAF1  
DEAR1  
DEDD  
DEDD2  
DEF6  
DEFA-PS13  
DEFB1  
DEFB11  
DEFB13  
DEFB15  
DEFB40  
DEFB42  
DEFB7

DEFB8  
DEGS2  
DEK  
DEM1  
DENND1A  
DENND1B  
DENND2A  
DENND2C  
DENND3  
DENND4A  
DENND4B  
DENND5A  
DENND5B  
DEPDC1B  
DEPDC6  
DEPDC7  
DERA  
DERL3  
DES  
DFFB  
DGAT2  
DGCR2  
DGCR8  
DGKA  
DGKE  
DGKG  
DGKH  
DGKI  
DGKZ  
DGUOK  
DHCR24  
DHCR7  
DHDDS  
DHDH  
DHH  
DHRS3  
DHRS4  
DHRS7  
DHRS7C  
DHTKD1  
DHX16  
DHX30  
DHX32  
DHX34  
DHX35  
DHX37  
DHX40  
DHX57  
DHX58  
DHX8  
DHX9  
DIAP1  
DIAP2

DIAP3  
DICER1  
DIDO1  
DIMT1  
DIO3  
DIO3OS  
DIP2A  
DIP2B  
DIP2C  
DIRAS2  
DIRC2  
DIS3L  
DIS3L2  
DISC1  
DIXDC1  
DKK3  
DKKL1  
DLC1  
DLEC1  
DLEU2  
DLEU7  
DLG1  
DLG3  
DLG5  
DLGAP1  
DLGAP3  
DLGAP4  
DLGAP5  
DLK1  
DLK2  
DLL1  
DLL4  
DLST  
DLX1AS  
DLX2  
DLX3  
DLX4  
DMBX1  
DMD  
DMGDH  
DMRT1  
DMRT2  
DMRT3  
DMRTA2  
DMRTB1  
DMRTC2  
DMXL2  
DNA2  
DNAHC1  
DNAHC10  
DNAHC11  
DNAHC2  
DNAHC6

DNAHC8  
DNAIC1  
DNAIC2  
DNAJA2  
DNAJA3  
DNAJB1  
DNAJB11  
DNAJB12  
DNAJB13  
DNAJB2  
DNAJB3  
DNAJB6  
DNAJB8  
DNAJC1  
DNAJC10  
DNAJC11  
DNAJC12  
DNAJC13  
DNAJC15  
DNAJC16  
DNAJC18  
DNAJC19  
DNAJC21  
DNAJC22  
DNAJC25  
DNAJC27  
DNAJC3  
DNAJC5  
DNAJC5B  
DNAJC6  
DNAJC7  
DNAJC8  
DNALC4  
DNASE1  
DNASE1L3  
DNER  
DNLZ  
DNM1  
DNM1L  
DNM2  
DNM3  
DNMBP  
DNMT3A  
DNMT3B  
DNMT3L  
DNPEP  
DNTP2  
DOC2B  
DOCK1  
DOCK10  
DOCK2  
DOCK4  
DOCK5

DOCK6  
DOCK7  
DOCK8  
DOCK9  
DOHH  
DOK2  
DOK3  
DOK5  
DOPEY2  
DOT1L  
DPAGT1  
DPCR1  
DPEP2  
DPF1  
DPF3  
DPH3  
DPM1  
DPP6  
DPPA3  
DPPA4  
DPPA5A  
DPT  
DPY19L3  
DPY30  
DPYD  
DPYS  
DPYSL3  
DPYSL5  
DQX1  
DR1  
DRAM2  
DRD4  
DSC1  
DSC2  
DSCAM  
DSCAML1  
DSCR3  
DSE  
DSEL  
DSG1C  
DSG2  
DSG4  
DSN1  
DSP  
DSPP  
DST  
DSTN  
DSTYK  
DTD1  
DTL  
DTNA  
DTNB  
DTNBP1

DTWD1  
DTX1  
DTX2  
DTX4  
DUOX1  
DUS2L  
DUS3L  
DUSP1  
DUSP10  
DUSP11  
DUSP12  
DUSP16  
DUSP2  
DUSP23  
DUSP26  
DUSP27  
DUSP3  
DUSP4  
DUSP5  
DUSP6  
DUSP7  
DUSP9  
DUT  
DVL1  
DVL3  
DVWA  
DYM  
DYNC1H1  
DYNC1I1  
DYNC1I2  
DYNC1LI1  
DYNC1LI2  
DYNC2LI1  
DYNLL1  
DYNLL2  
DYNLRB2  
DYNLT1A  
DYNLT1B  
DYRK1A  
DYRK1B  
DYRK2  
DYRK3  
DYSF  
DZIP1  
E030003E18RIK  
E030010A14RIK  
E030011O05RIK  
E030025P04RIK  
E130012A19RIK  
E130306D19RIK  
E130309D02RIK  
E130309D14RIK  
E130309F12RIK

E130311K13RIK  
E130317F20RIK  
E230019M04RIK  
E230025N22RIK  
E230029C05RIK  
E2F1  
E2F2  
E2F3  
E2F6  
E2F7  
E330016A19RIK  
E330026B02RIK  
E330033B04RIK  
E330034G19RIK  
EAPP  
EBAG9  
EBF1  
EBF2  
EBF3  
EBF4  
EBPL  
ECD  
ECE1  
ECHDC2  
ECHDC3  
ECM1  
ECT2  
EDA  
EDA2R  
EDAR  
EDARADD  
EDEM1  
EDIL3  
EDN1  
EDN2  
EDN3  
EEA1  
EED  
EEF1A1  
EEF1E1  
EEF1G  
EEF2  
EEF2K  
EEFSEC  
EEPD1  
EFCAB10  
EFCAB2  
EFCAB4B  
EFCAB5  
EFCAB6  
EFEMP1  
EFHA1  
EFHC1



EFNA1  
EFNA2  
EFNA3  
EFNA4  
EFNA5  
EFNB1  
EFNB2  
EFNB3  
EFTUD1  
EG240055  
EGFL7  
EGFLAM  
EGFR  
EGLN3  
EGR1  
EGR2  
EGR4  
EHD1  
EHD2  
EHD3  
EHD4  
EHF  
EHHADH  
EHMT1  
EI24  
EID2  
EID3  
EIF1  
EIF1A  
EIF1B  
EIF2A  
EIF2AK2  
EIF2AK3  
EIF2B2  
EIF2B3  
EIF2B5  
EIF2C1  
EIF2C2  
EIF2C3  
EIF2S2  
EIF2S3X  
EIF3B  
EIF3C  
EIF3E  
EIF3H  
EIF3I  
EIF3K  
EIF3L  
EIF4A2  
EIF4A3  
EIF4B  
EIF4E  
EIF4E2

EIF4E3  
EIF4EBP1  
EIF4EBP2  
EIF4G1  
EIF4G3  
EIF5  
EIF5A  
EIF5A2  
ELAC1  
ELAC2  
ELAVL1  
ELAVL2  
ELF1  
ELF2  
ELF3  
ELF5  
ELFN1  
ELFN2  
ELK1  
ELK3  
ELK4  
ELL  
ELL2  
ELL3  
ELMO1  
ELMO2  
ELMO3  
ELMOD1  
ELMOD2  
ELN  
ELOVL2  
ELOVL5  
ELOVL6  
ELOVL7  
ELP3  
ELP4  
EMB  
EMD  
EMID1  
EMID2  
EMILIN1  
EMILIN2  
EML1  
EML2  
EML4  
EML6  
EMP1  
EMP2  
EMR1  
EMX1  
EN1  
EN2  
ENAH

ENC1  
ENDOD1  
ENG  
ENHO  
ENO1  
ENOPH1  
ENOX1  
ENOX2  
ENPEP  
ENPP3  
ENPP6  
ENSA  
ENTHD1  
ENTPD1  
ENTPD2  
ENTPD4  
ENTPD6  
ENTPD7  
ENY2  
EOMES  
EP300  
EP400  
EPAS1  
EPB4.1  
EPB4.1L1  
EPB4.1L2  
EPB4.1L3  
EPB4.1L4A  
EPB4.1L4B  
EPB4.9  
EPC2  
EPCAM  
EPA10  
EPA2  
EPA4  
EPA5  
EPHB1  
EPHB2  
EPHB3  
EPHB4  
EPHX1  
EPHX3  
EPM2A  
EPM2AIP1  
EPN1  
EPN2  
EPN3  
EPPK1  
EPS15  
EPS15L1  
EPS8  
EPS8L2  
EPS8L3

EPSTI1  
ERAP1  
ERAS  
ERBB2IP  
ERBB3  
ERBB4  
ERC1  
ERC2  
ERCC1  
ERCC3  
ERCC4  
ERCC6  
ERCC6L  
ERF  
ERG  
ERGIC1  
ERI3  
ERICH1  
ERLEC1  
ERLIN1  
ERMP1  
ERN1  
ERO1L  
ERP27  
ERP44  
ERRFI1  
ERV3  
ES1  
ES31  
ESCO1  
ESPL1  
ESPN  
ESR2  
ESRP1  
ESRP2  
ESRRA  
ESRRB  
ESYT2  
ESYT3  
ETAA1  
ETF1  
ETF1A  
ETFB  
ETHE1  
ETL4  
ETNK1  
ETS1  
ETS2  
ETV1  
ETV2  
ETV3  
ETV4  
ETV5

ETV6  
EVC  
EVI5  
EVI5L  
EVL  
EVPL  
EVX1  
EWSR1  
EXD2  
EXOC1  
EXOC2  
EXOC3L  
EXOC4  
EXOC6  
EXOC6B  
EXOC7  
EXOC8  
EXOG  
EXOSC10  
EXOSC3  
EXPH5  
EXT1  
EXT2  
EXTL1  
EXTL3  
EYA2  
EYA3  
EYA4  
EZH2  
EZR  
F10  
F11  
F11R  
F2  
F2R  
F2RL1  
F2RL2  
F3  
F730016J06RIK  
F730043M19RIK  
F730047E07RIK  
F8  
F830045P16RIK  
F830116E18RIK  
FA2H  
FAAH  
FABP1  
FABP12  
FABP3  
FABP6  
FADD  
FADS1  
FADS2

FAF1  
FAF2  
FAHD2A  
FAIM2  
FAIM3  
FAM100B  
FAM101A  
FAM101B  
FAM102A  
FAM102B  
FAM103A1  
FAM105A  
FAM105B  
FAM107A  
FAM107B  
FAM108A  
FAM108B  
FAM109A  
FAM110B  
FAM110C  
FAM111A  
FAM113B  
FAM114A1  
FAM114A2  
FAM115A  
FAM115C  
FAM116A  
FAM117A  
FAM117B  
FAM118A  
FAM118B  
FAM119A  
FAM120A  
FAM120B  
FAM120C  
FAM122B  
FAM123A  
FAM123B  
FAM123C  
FAM124B  
FAM125B  
FAM126A  
FAM128B  
FAM129A  
FAM129B  
FAM129C  
FAM131B  
FAM131C  
FAM133B  
FAM134B  
FAM134C  
FAM135A  
FAM135B

FAM136A  
FAM13A  
FAM13B  
FAM13C  
FAM149B  
FAM155A  
FAM159A  
FAM159B  
FAM160B1  
FAM161A  
FAM162A  
FAM163A  
FAM167A  
FAM167B  
FAM168A  
FAM168B  
FAM169A  
FAM169B  
FAM170B  
FAM172A  
FAM175A  
FAM175B  
FAM176A  
FAM176B  
FAM178A  
FAM178B  
FAM180A  
FAM184A  
FAM186B  
FAM188B  
FAM189A1  
FAM189A2  
FAM189B  
FAM18A  
FAM18B  
FAM190A  
FAM192A  
FAM193A  
FAM195A  
FAM195B  
FAM196B  
FAM198B  
FAM19A1  
FAM19A2  
FAM19A3  
FAM19A4  
FAM19A5  
FAM20A  
FAM20B  
FAM20C  
FAM26E  
FAM26F  
FAM32A

FAM35A  
FAM36A  
FAM38A  
FAM38B  
FAM3B  
FAM3C  
FAM40A  
FAM40B  
FAM43A  
FAM43B  
FAM46B  
FAM46C  
FAM49A  
FAM50B  
FAM53A  
FAM53B  
FAM55C  
FAM55D  
FAM57A  
FAM58B  
FAM59A  
FAM5C  
FAM60A  
FAM63A  
FAM65A  
FAM65C  
FAM69A  
FAM69B  
FAM69C  
FAM71A  
FAM71E1  
FAM71E2  
FAM71F1  
FAM73A  
FAM76A  
FAM76B  
FAM78A  
FAM78B  
FAM81A  
FAM82A1  
FAM82B  
FAM83A  
FAM83D  
FAM84A  
FAM86  
FAM92B  
FAM96A  
FAM98B  
FANCA  
FANCC  
FANCE  
FANCG  
FANCI



FANCL  
FAR1  
FARP1  
FARS2  
FARSA  
FAS  
FASL  
FASN  
FASTK  
FAT1  
FAT2  
FAT4  
FBF1  
FBLIM1  
FBLN1  
FBLN2  
FBLN5  
FBN2  
FBP1  
FBP2  
FBRS  
FBRSL1  
FBXL12  
FBXL13  
FBXL15  
FBXL16  
FBXL17  
FBXL18  
FBXL19  
FBXL2  
FBXL20  
FBXL22  
FBXL3  
FBXL4  
FBXL5  
FBXL6  
FBXL7  
FBXO10  
FBXO11  
FBXO15  
FBXO16  
FBXO17  
FBXO2  
FBXO21  
FBXO22  
FBXO25  
FBXO27  
FBXO28  
FBXO3  
FBXO30  
FBXO31  
FBXO32  
FBXO33

FBXO36  
FBXO41  
FBXO42  
FBXO43  
FBXO47  
FBXO6  
FBXO8  
FBXO9  
FBXW10  
FBXW11  
FBXW13  
FBXW15  
FBXW17  
FBXW20  
FBXW4  
FBXW5  
FBXW7  
FBXW8  
FCF1  
FCGBP  
FCGR1  
FCGR3  
FCGR4  
FCGRT  
FCHO1  
FCHO2  
FCHSD2  
FCRL1  
FCRL5  
FCRLB  
FCRLS  
FDFT1  
FDX1  
FDX1L  
FEM1A  
FEM1B  
FEM1C  
FEN1  
FERMT2  
FERMT3  
FERT2  
FETUB  
FEV  
FEZ1  
FEZ2  
FEZF2  
FFAR2  
FFAR3  
FGD1  
FGD2  
FGD4  
FGD5  
FGD6

FGF1  
FGF10  
FGF12  
FGF14  
FGF15  
FGF17  
FGF21  
FGF23  
FGF3  
FGF4  
FGF5  
FGF6  
FGF8  
FGF9  
FGFR1  
FGFR1OP  
FGFR2  
FGFR3  
FGFR4  
FGG  
FGGY  
FGL1  
FGR  
FH1  
FHAD1  
FHDC1  
FHIT  
FHL2  
FHL3  
FHL4  
FHOD1  
FHOD3  
FICD  
FIG4  
FIGNL1  
FILIP1  
FILIP1L  
FITM2  
FJX1  
FKBP11  
FKBP3  
FKBP5  
FKBP6  
FKBP8  
FKBP9  
FLCN  
FLI1  
FLNA  
FLNB  
FLNC  
FLOT2  
FLRT1  
FLRT2

FLRT3  
FLT1  
FLT3  
FLT4  
FLYWCH1  
FLYWCH2  
FMC1  
FMN1  
FMN2  
FMNL1  
FMNL2  
FMNL3  
FMO1  
FMOD  
FN1  
FN3KRP  
FNBP1  
FNBP1L  
FNBP4  
FNDC1  
FNDC3A  
FNDC3B  
FNDC5  
FNTB  
FOLH1  
FOS  
FOSB  
FOSL2  
FOXA1  
FOXA2  
FOXA3  
FOXB1  
FOXB2  
FOXC1  
FOXD1  
FOXD3  
FOXE1  
FOXF1A  
FOXH1  
FOXI1  
FOXI3  
FOXJ1  
FOXJ2  
FOXJ3  
FO XK1  
FO XK2  
FOXL1  
FOXM1  
FOXN2  
FOXN3  
FOXN4  
FO XO1  
FO XO3

FOXO6  
FOXP1  
FOXP2  
FOXP4  
FOXQ1  
FRAS1  
FRAT1  
FREM1  
FREM2  
FREQ  
FRMD3  
FRMD4A  
FRMD4B  
FRMD5  
FRMD6  
FRMD8  
FRMPD1  
FRMPD3  
FRMPD4  
FRRS1  
FRS2  
FRS3  
FRY  
FRYL  
FRZB  
FSCB  
FSCN1  
FSCN2  
FSD2  
FSHB  
FSIP1  
FSTL1  
FSTL4  
FSTL5  
FTCD  
FTH1  
FTL1  
FTMT  
FTO  
FTSJ1  
FUBP1  
FUBP3  
FUCA1  
FUCA2  
FUNDC1  
FURIN  
FUT10  
FUT11  
FUT2  
FUT7  
FUT9  
FXN  
FXR1

FXD2  
FXD3  
FXD4  
FXD5  
FXD6  
FYB  
FYN  
FYTD1  
FZD10  
FZD2  
FZD3  
FZD4  
FZD5  
FZD6  
FZD7  
FZD8  
FZD9  
FZR1  
G0S2  
G2E3  
G3BP1  
G3BP2  
G630016D24RIK  
G630025P09RIK  
G6B  
GAA  
GAB1  
GABARAPL1  
GABARAPL2  
GABBR1  
GABBR2  
GABPA  
GABPB1  
GABPB2  
GABRA5  
GABRB2  
GABRB3  
GABRG3  
GABRP  
GABRR1  
GABRR2  
GABRR3  
GAD1  
GAD2  
GADD45A  
GADD45B  
GADD45G  
GADL1  
GAL  
GAL3ST3  
GAL3ST4  
GALE  
GALK2

GALM  
GALNT10  
GALNT12  
GALNT13  
GALNT2  
GALNT3  
GALNT4  
GALNT6  
GALNT7  
GALNT9  
GALNTL1  
GALNTL2  
GALNTL4  
GALNTL5  
GALP  
GALR2  
GALT  
GAMT  
GAN  
GANAB  
GAP43  
GAPDH  
GAPVD1  
GARNL3  
GARS  
GART  
GAS1  
GAS2L3  
GAS5  
GAS6  
GAS7  
GATA2  
GATA3  
GATA5  
GATA6  
GATAD2A  
GATAD2B  
GATSL3  
GBA  
GBAS  
GBE1  
GBGT1  
GBP2  
GBP5  
GBP6  
GBX1  
GBX2  
GCA  
GCAP14  
GCAT  
GCDH  
GCGR  
GCH1

GCK  
GCLC  
GCLM  
GCM1  
GCM2  
GCN1L1  
GCNT1  
GCNT2  
GCNT3  
GCNT4  
GCOM1  
GDA  
GDAP1  
GDAP1L1  
GDAP2  
GDE1  
GDF15  
GDF3  
GDF6  
GDI2  
GDPD3  
GDPD5  
GEM  
GEN1  
GFI1  
GFI1B  
GFM1  
GFM2  
GFOD1  
GFOD2  
GFPT1  
GFPT2  
GFRA1  
GFRA2  
GFRA3  
GFRA4  
GGA1  
GGNBP1  
GGNBP2  
GGT5  
GGT6  
GGT7  
GGTA1  
GHDC  
GHR  
GHRHR  
GHSR  
GIMAP8  
GINS2  
GINS3  
GIP  
GIPC1  
GIPC2



GIT1  
GIT2  
GIYD2  
GJA1  
GJA3  
GJA5  
GJB1  
GJB3  
GJB4  
GJB5  
GJB6  
GJC1  
GJC2  
GJD3  
GJD4  
GJE1  
GK5  
GKAP1  
GLB1  
GLCCI1  
GLCE  
GLDC  
GLDN  
GLG1  
GLI1  
GLI2  
GLIPR2  
GLIS1  
GLIS2  
GLIS3  
GLO1  
GLOD5  
GLP1R  
GLRA4  
GLRP1  
GLRX  
GLRX2  
GLRX3  
GLRX5  
GLS  
GLT1D1  
GLT25D1  
GLT25D2  
GLT28D2  
GLT8D2  
GLT8D3  
GLTP  
GLTPD1  
GLTPD2  
GLTSCR1  
GLUD1  
GLYCAM1  
GLYCTK

GLYR1  
GM10035  
GM10069  
GM1027  
GM10451  
GM10565  
GM10778  
GM10863  
GM10941  
GM11194  
GM11330  
GM11346  
GM11437  
GM11487  
GM11541  
GM11545  
GM11744  
GM11961  
GM11978  
GM12166  
GM12169  
GM12528  
GM12789  
GM12824  
GM12888  
GM13128  
GM13152  
GM13154  
GM1322  
GM13242  
GM13251  
GM13280  
GM13363  
GM1337  
GM13547  
GM13646  
GM13749  
GM13889  
GM14005  
GM14092  
GM14203  
GM14207  
GM15217  
GM1527  
GM1564  
GM1568  
GM1574  
GM1587  
GM1631  
GM16386  
GM16432  
GM16515  
GM16517

GM16532  
GM1943  
GM1968  
GM216  
GM2176  
GM239  
GM266  
GM3219  
GM347  
GM414  
GM4371  
GM438  
GM4769  
GM4792  
GM4850  
GM4894  
GM4922  
GM4925  
GM4931  
GM4934  
GM4937  
GM505  
GM5077  
GM5089  
GM5105  
GM5113  
GM5124  
GM5127  
GM5129  
GM5132  
GM5134  
GM5148  
GM5158  
GM52  
GM525  
GM5424  
GM5434  
GM5447  
GM5468  
GM5475  
GM5506  
GM5512  
GM5531  
GM5544  
GM5567  
GM5607  
GM5627  
GM572  
GM5766  
GM5801  
GM5820  
GM5887  
GM595

GM5972  
GM608  
GM6251  
GM628  
GM648  
GM6524  
GM6578  
GM6644  
GM6710  
GM672  
GM6907  
GM694  
GM6981  
GM7092  
GM71  
GM7120  
GM7244  
GM7265  
GM7334  
GM7348  
GM7367  
GM7714  
GM7904  
GM806  
GM815  
GM826  
GM829  
GM833  
GM839  
GM8439  
GM853  
GM8580  
GM8615  
GM8783  
GM8801  
GM8817  
GM884  
GM9376  
GM941  
GM949  
GM962  
GM973  
GM9733  
GM98  
GM9904  
GMDS  
GMEB1  
GMFB  
GMFG  
GMPPA  
GMPPB  
GMPR  
GMPS

GNA11  
GNA12  
GNA13  
GNA14  
GNA15  
GNAI1  
GNAI2  
GNAI3  
GNAL  
GNAL1  
GNAO1  
GNAQ  
GNAS  
GNAT2  
GNB1  
GNB1L  
GNB2  
GNB2L1  
GNB4  
GNB5  
GNE  
GNG10  
GNG13  
GNG2  
GNG3  
GNG4  
GNG7  
GNGT2  
GNPDA1  
GNPNAT1  
GNRH1  
GNRHR  
GNS  
GOLGA4  
GOLGA7  
GOLGA7B  
GOLM1  
GOLPH3  
GOPC  
GORAB  
GORASP2  
GOSR1  
GOT1  
GOT2  
GP5  
GPA33  
GPAT2  
GPATCH2  
GPATCH3  
GPATCH8  
GPBP1  
GPC1  
GPC3

GPC4  
GPC5  
GPC6  
GPD1L  
GPD2  
GPHB5  
GPHN  
GPI1  
GPN2  
GPN3  
GPNMB  
GPR1  
GPR107  
GPR114  
GPR116  
GPR12  
GPR120  
GPR123  
GPR124  
GPR125  
GPR132  
GPR133  
GPR135  
GPR142  
GPR150  
GPR151  
GPR155  
GPR156  
GPR157  
GPR158  
GPR160  
GPR161  
GPR176  
GPR177  
GPR179  
GPR180  
GPR19  
GPR20  
GPR26  
GPR31C  
GPR37L1  
GPR39  
GPR4  
GPR45  
GPR50  
GPR55  
GPR56  
GPR6  
GPR62  
GPR64  
GPR68  
GPR75  
GPR77

GPR88  
GPR97  
GPR98  
GPRC2A-RS5  
GPRC5A  
GPRC5B  
GPRC5C  
GPRC5D  
GPRIN2  
GPRIN3  
GPS2  
GPSM1  
GPT2  
GPX1  
GPX4  
GPX5  
GPX7  
GRAMD1A  
GRAMD1B  
GRAMD3  
GRAMD4  
GRAP  
GRAP2  
GRASP  
GRB10  
GRB14  
GRB2  
GRB7  
GREB1  
GREB1L  
GRHL1  
GRHL2  
GRHL3  
GRHPR  
GRIA2  
GRIA4  
GRID1  
GRID2  
GRIFIN  
GRIK2  
GRIK3  
GRIK4  
GRIK5  
GRIN1  
GRIN2A  
GRIN2B  
GRIN3B  
GRINA  
GRINL1A  
GRIP1  
GRIPAP1  
GRIT  
GRK4

GRK5  
GRM4  
GRM5  
GRM8  
GRN  
GRP  
GRPEL1  
GRRP1  
GRSF1  
GRTP1  
GSC  
GSC2  
GSDMC  
GSDMD  
GSE1  
GSG1L  
GSK3B  
GSN  
GSPT1  
GSR  
GSS  
GSTA2  
GSTA3  
GSTA4  
GSTM1  
GSTM3  
GSTM6  
GSTM7  
GSTO1  
GSTP1  
GSTT2  
GSX1  
GSX2  
GTF2A1  
GTF2E1  
GTF2F2  
GTF2H1  
GTF2H4  
GTF2I  
GTF2IRD1  
GTF2IRD2  
GTF3A  
GTF3C5  
GTF3C6  
GTPBP4  
GTPBP6  
GTPBP8  
GT(ROSA)26SOR  
GTSE1  
GTSF1  
GTSF1L  
GUCA1B  
GUCA2A



GUCY1B2  
GUCY2D  
GUCY2E  
GUCY2G  
GUF1  
GUK1  
GULP1  
GUSB  
GYLTL1B  
GYPC  
GYS1  
GYS2  
GZF1  
GZMB  
H13  
H1F0  
H2-AB1  
H2AFX  
H2AFY  
H2AFY2  
H2AFZ  
H2-BL  
H2-DMA  
H2-M5  
H2-OA  
H2-Q10  
H3F3A  
H6PD  
HAAO  
HABP2  
HABP4  
HACE1  
HACL1  
HADH  
HADHB  
HAGH  
HAL  
HAND1  
HAND2  
HAP1  
HAPLN4  
HARS2  
HAS1  
HAS3  
HAT1  
HAUS1  
HAUS4  
HAUS8  
HAVCR2  
HBA-A1  
HBEGF  
HBP1  
HBQ1

HBS1L  
HBXIP  
HCCS  
HCFC1  
HCFC2  
HCK  
HCLS1  
HCN1  
HCN4  
HCRTR1  
HCRTR2  
HDAC1  
HDAC4  
HDAC5  
HDAC6  
HDAC7  
HDAC8  
HDGF  
HDGFL1  
HDLBP  
HEATR1  
HEATR2  
HEATR5A  
HEATR5B  
HEATR6  
HEBP1  
HEBP2  
HECTD1  
HECTD2  
HECW1  
HECW2  
HEG1  
HELB  
HELLS  
HELQ  
HELT  
HELZ  
HEMGN  
HEPACAM  
HERC1  
HERC3  
HERC4  
HERPUD1  
HERPUD2  
HES1  
HES3  
HES5  
HES6  
HEXA  
HEXB  
HEXDC  
HEXIM1  
HFE2

HFM1  
HGSNAT  
HHAT  
HHATL  
HHEX  
HHIPL1  
HIAT1  
HIBADH  
HIC1  
HIC2  
HIF1AN  
HIF3A  
HIGD1A  
HILS1  
HINT3  
HIP1  
HIP1R  
HIPK1  
HIPK2  
HIPK3  
HIRA  
HIST1H1A  
HIST1H1C  
HIST1H2AD  
HIST1H2AH  
HIST1H2AI  
HIST1H2BF  
HIST1H2BP  
HIST1H3D  
HIST1H3E  
HIST1H3H  
HIST1H4H  
HIST2H2AA1  
HIST2H2BE  
HIST2H4  
HIST3H2BA  
HIVEP1  
HIVEP2  
HIVEP3  
HK1  
HK2  
HKDC1  
HLCS  
HLTF  
HLX  
HMBS  
HMCN1  
HMG20A  
HMG20B  
HMGA1  
HMGA2  
HMGB1  
HMGB2

HMGB4  
HMGCL  
HMGCR  
HMGN1  
HMGN2  
HMGN3  
HMGN5  
HMGXB3  
HMGXB4  
HMHA1  
HMOX1  
HMX1  
HMX3  
HN1L  
HNF1A  
HNF1B  
HNMT  
HNRNPA0  
HNRNPA2B1  
HNRNPA3  
HNRNPD  
HNRNPF  
HNRNPH2  
HNRNPK  
HNRNPL  
HNRNPR  
HNRPDL  
HNRPLL  
HOMER1  
HOMER2  
HOMER3  
HOMEZ  
HOOK2  
HORMAD2  
HOXA1  
HOXA10  
HOXA11  
HOXA13  
HOXA3  
HOXA7  
HOXA9  
HOXB13  
HOXB3  
HOXB9  
HOXC12  
HOXC13  
HOXC4  
HOXC5  
HOXC8  
HOXD1  
HOXD12  
HOXD3  
HOXD4

HOXD8  
HOXD9  
HPCA  
HPCAL1  
HPCAL4  
HPD  
HPDL  
HPGD  
HPGDS  
HPN  
HPS3  
HPS5  
HPS6  
HPSE  
HPSE2  
HPX  
HRH1  
HRH2  
HRH3  
HRNR  
HRSP12  
HS1BP3  
HS2ST1  
HS3ST2  
HS3ST3B1  
HS3ST5  
HS3ST6  
HS6ST1  
HS6ST3  
HSBP1  
HSBP1L1  
HSD11B1  
HSD17B11  
HSD17B12  
HSD17B14  
HSD17B2  
HSD17B3  
HSD17B6  
HSD17B7  
HSDL2  
HSF1  
HSF2  
HSF2BP  
HSH2D  
HSP90AA1  
HSP90AB1  
HSPA14  
HSPA1A  
HSPA1B  
HSPA1L  
HSPA4  
HSPA5  
HSPA8

HSPA9  
HSPB1  
HSPB11  
HSPB3  
HSPB7  
HSPB8  
HSPB9  
HSPBAP1  
HSPE1  
HSPG2  
HTATIP2  
HTR1B  
HTR1D  
HTR2B  
HTR2C  
HTR4  
HTR5A  
HTR7  
HTRA1  
HTRA3  
HTRA4  
HTT  
HUNK  
HUWE1  
HVCN1  
HYAL1  
HYAL3  
HYAL4  
HYAL5  
HYAL6  
HYDIN  
HYI  
I1C0022H11RIK  
IAH1  
IARS2  
IBTK  
ICA1  
ICAM1  
ICAM4  
ICAM5  
ICK  
ICMT  
ICOSL  
ICT1  
ID1  
ID2  
ID3  
ID4  
IDE  
IDH2  
IDH3A  
IDO2  
IDS

IER2  
IER3  
IER5  
IER5L  
IFFO1  
IFFO2  
IFI202B  
IFITM1  
IFITM2  
IFITM3  
IFITM6  
IFLTD1  
IFNA13  
IFNAR1  
IFNAR2  
IFNG  
IFNGR2  
IFRD1  
IFT122  
IFT52  
IFT80  
IFT81  
IGDCC3  
IGDCC4  
IGF1  
IGF1R  
IGF2BP1  
IGF2BP2  
IGF2BP3  
IGF2R  
IGFALS  
IGFBP2  
IGFBP4  
IGFBP5  
IGFBP7  
IGLON5  
IGSF1  
IGSF11  
IGSF21  
IGSF3  
IGSF5  
IGSF9  
IGSF9B  
IHH  
IKBKB  
IKZF3  
IKZF4  
IKZF5  
IL10  
IL10RA  
IL12A  
IL12B  
IL12RB1

IL13  
IL15  
IL16  
IL17A  
IL17B  
IL17D  
IL17F  
IL17RC  
IL17RD  
IL1B  
IL1R1  
IL1RAPL1  
IL20RB  
IL22  
IL23R  
IL27RA  
IL28A  
IL28B  
IL28RA  
IL2RA  
IL3  
IL33  
IL34  
IL3RA  
IL4  
IL4RA  
IL5  
IL6RA  
IL6ST  
IL7  
IL7R  
IL8RA  
IL9R  
ILD1R1  
ILF2  
ILF3  
ILK  
IMMP2L  
IMMT  
IMPA2  
IMPACT  
IMPDH2  
IMPG2  
INA  
INADL  
INCENP  
ING2  
ING3  
INHA  
INHBB  
INHBC  
INMT  
INO80



INO80C  
INO80D  
INO80E  
INPP4A  
INPP4B  
INPP5A  
INPP5B  
INPP5D  
INPP5F  
INPP5J  
INPP5K  
INPPL1  
INS1  
INS2  
INSIG1  
INSIG2  
INSL3  
INSM1  
INSR  
INTS10  
INTS3  
INTS4  
INTS6  
INTS7  
INTS9  
INVS  
IP6K1  
IP6K2  
IP6K3  
IPCEF1  
IPMK  
IPO11  
IPO5  
IPO7  
IPPK  
IQCA  
IQCD  
IQCE  
IQCF1  
IQCF4  
IQCF6  
IQCH  
IQCK  
IQGAP1  
IQGAP2  
IQSEC1  
IQSEC2  
IQSEC3  
IRAK1  
IRAK1BP1  
IRAK2  
IRAK3  
IREB2

IRF1  
IRF2  
IRF2BP2  
IRF6  
IRF8  
IRF9  
IRG1  
IRGC1  
IRGM2  
IRS1  
IRS2  
IRX1  
IRX2  
IRX3  
IRX4  
IRX5  
IRX6  
ISG15  
ISG20  
ISG20L2  
ISL1  
ISL2  
ISLR  
ISLR2  
ISOC2A  
ISOC2B  
ISX  
ISY1  
ITCH  
ITFG2  
ITFG3  
ITGA1  
ITGA10  
ITGA11  
ITGA3  
ITGA5  
ITGA6  
ITGA8  
ITGA9  
ITGAE  
ITGAL  
ITGAM  
ITGAV  
ITGB1BP2  
ITGB2  
ITGB3  
ITGB3BP  
ITGB4  
ITGB5  
ITGB6  
ITGB7  
ITGBL1  
ITIH2

ITIH4  
ITIH5  
ITM2B  
ITM2C  
ITPK1  
ITPKA  
ITPKB  
ITPKC  
ITPR1  
ITPR2  
ITPR3  
ITPRIP  
ITPRIPL1  
ITPRIPL2  
ITSN1  
ITSN2  
IVD  
IVNS1ABP  
JAG1  
JAG2  
JAGN1  
JAK2  
JAK3  
JAKMIP1  
JAKMIP2  
JAKMIP3  
JAM2  
JAM3  
JARID2  
JAZF1  
JDP2  
JHDM1D  
JKAMP  
JMJD1C  
JMJD4  
JMJD5  
JMJD6  
JMJD8  
JMY  
JOSD2  
JPH2  
JPH3  
JRK  
JUB  
JUN  
JUP  
KANK1  
KANK2  
KANK3  
KANK4  
KARS  
KAT2A  
KAT2B



KCNN3  
KCNN4  
KCNQ1  
KCNQ2  
KCNQ3  
KCNQ4  
KCN53  
KCNT2  
KGNU1  
KCTD1  
KCTD12  
KCTD14  
KCTD15  
KCTD16  
KCTD18  
KCTD20  
KCTD21  
KCTD4  
KCTD6  
KCTD7  
KCTD9  
KDELC2  
KDELR3  
KDM1A  
KDM2A  
KDM2B  
KDM3A  
KDM3B  
KDM4C  
KDM5A  
KDM5B  
KDM6B  
KDR  
KEAP1  
KHDRBS1  
KIF11  
KIF13A  
KIF13B  
KIF14  
KIF16B  
KIF18A  
KIF18B  
KIF19A  
KIF1A  
KIF1B  
KIF20B  
KIF21A  
KIF21B  
KIF23  
KIF24  
KIF26A  
KIF26B  
KIF27

KIF2C  
KIF3A  
KIF3C  
KIF4  
KIF5A  
KIF5B  
KIF5C  
KIF6  
KIF9  
KIFC1  
KIFC2  
KIFC3  
KIN  
KIRREL  
KIRREL2  
KIRREL3  
KIS2  
KISS1R  
KIT  
KL  
KLB  
KLC2  
KLC3  
KLF10  
KLF12  
KLF13  
KLF14  
KLF15  
KLF16  
KLF17  
KLF2  
KLF3  
KLF4  
KLF5  
KLF6  
KLF7  
KLF8  
KLF9  
KLHDC10  
KLHDC4  
KLHDC7A  
KLHDC7B  
KLHDC8A  
KLHDC8B  
KLHL12  
KLHL18  
KLHL2  
KLHL20  
KLHL22  
KLHL25  
KLHL29  
KLHL31  
KLHL32

KLHL34  
KLHL36  
KLHL38  
KLHL4  
KLHL5  
KLHL7  
KLK10  
KLK15  
KLK4  
KLK5  
KLK6  
KLK7  
KLK9  
KLRAQ1  
KLRB1B  
KLRB1C  
KLRG1  
KLRG2  
KNCN  
KNDC1  
KNG1  
KPNA2  
KPNB1  
KRAS  
KRBA1  
KRCC1  
KREMEN1  
KREMEN2  
KRR1  
KRT17  
KRT18  
KRT19  
KRT222  
KRT23  
KRT33A  
KRT33B  
KRT42  
KRT7  
KRT8  
KRT80  
KRT9  
KRTAP11-1  
KRTAP17-1  
KRTAP2-4  
KRTAP31-2  
KRTAP4-1  
KRTAP7-1  
KRTAP9-5  
KRTDAP  
KSR1  
KSR2  
KTELC1  
KTI12

KTN1  
L1CAM  
L1TD1  
L3MBTL  
L3MBTL3  
LACE1  
LACTB  
LACTB2  
LAD1  
LAG3  
LAMA1  
LAMA2  
LAMA3  
LAMA5  
LAMB1-1  
LAMB2  
LAMB3  
LAMC1  
LAMC2  
LAMC3  
LAMP1  
LAMP2  
LANCL1  
LANCL2  
LAO1  
LAP3  
LAPTM4A  
LAPTM4B  
LAPTM5  
LARGE  
LARP1  
LARP4B  
LARP6  
LARP7  
LARS2  
LAS1L  
LASP1  
LASS2  
LASS4  
LASS5  
LASS6  
LAT  
LATS1  
LATS2  
LAX1  
LBR  
LBX1  
LBXCOR1  
LCA5  
LCK  
LCLAT1  
LCOR  
LCORL



LCP1  
LCP2  
LCT  
LCTL  
LDB1  
LDB2  
LDB3  
LDHA  
LDHB  
LDLR  
LDLRAD2  
LDLRAD3  
LDLRAP1  
LDOC1  
LDOC1L  
LECT1  
LEF1  
LEFTY1  
LEKR1  
LEMD1  
LEMD2  
LEMD3  
LENEP  
LENG8  
LEO1  
LEP  
LEPR  
LEPROT  
LETM1  
LETMD1  
LFNG  
LGALS2  
LGALS3  
LGALS3BP  
LGALS7  
LGALS9  
LGI1  
LGI2  
LGMN  
LGR4  
LGTN  
LHB  
LHCGR  
LHFPL2  
LHFPL3  
LHFPL4  
LHX1  
LHX2  
LHX3  
LHX4  
LHX5  
LHX6  
LHX8

LHX9  
LIF  
LIFR  
LIG1  
LIG4  
LIM2  
LIMA1  
LIMCH1  
LIMD1  
LIMK1  
LIMK2  
LIMS1  
LIMS2  
LIN28  
LIN28B  
LIN54  
LIN9  
LINGO1  
LINGO2  
LINGO3  
LINS2  
LIPC  
LIPG  
LIPH  
LIPT2  
LITAF  
LIX1  
LIX1L  
LLGL1  
LLGL2  
LLPH  
LMAN1  
LMAN1L  
LMAN2  
LMBRD1  
LMBRD2  
LMCD1  
LMNA  
LMNB1  
LMNB2  
LMO2  
LMO7  
LMOD1  
LMOD2  
LMOD3  
LMX1B  
LNP  
LNPEP  
LNX1  
LNX2  
LOC100039801  
LOC100043315  
LOC100233175

LOC100233207  
LOC16697  
LOC624853  
LOC665622  
LOH12CR1  
LONRF1  
LONRF2  
LOXHD1  
LOXL1  
LOXL2  
LOXL3  
LOXL4  
LPAR1  
LPAR2  
LPAR4  
LPAR5  
LPAR6  
LPCAT2  
LPCAT3  
LPCAT4  
LPGAT1  
LPHN1  
LPHN3  
LPIN1  
LPIN2  
LPIN3  
LPL  
LPP  
LRAT  
LRBA  
LRCH1  
LRCH3  
LRCH4  
LRFN1  
LRFN2  
LRIG1  
LRIG2  
LRIG3  
LRMP  
LRP1  
LRP10  
LRP12  
LRP1B  
LRP2  
LRP3  
LRP4  
LRP5  
LRP6  
LRP8  
LRPAP1  
LRRC1  
LRRC10  
LRRC15

LRRC2  
LRRC20  
LRRC24  
LRRC25  
LRRC26  
LRRC28  
LRRC30  
LRRC32  
LRRC33  
LRRC34  
LRRC38  
LRRC4  
LRRC41  
LRRC45  
LRRC49  
LRRC4B  
LRRC50  
LRRC51  
LRRC52  
LRRC57  
LRRC58  
LRRC59  
LRRC61  
LRRC67  
LRRC7  
LRRC8A  
LRRC8B  
LRRC8C  
LRRC8D  
LRRC9  
LRRFIP1  
LRRIQ4  
LRRK1  
LRRN2  
LRRN4  
LRRN4CL  
LRSAM1  
LRWD1  
LSM10  
LSM11  
LSM14A  
LSM14B  
LSM2  
LSM3  
LSM4  
LSM6  
LST1  
LTA4H  
LTB  
LTB4R1  
LTB4R2  
LTBP1  
LTBP3

LTBP4  
LUC7L  
LUZP1  
LY6C2  
LY6E  
LY6F  
LY6G6D  
LY6G6E  
LY6K  
LY75  
LY86  
LYN  
LYPD4  
LYPD6  
LYPD6B  
LYPLA1  
LYRM1  
LYRM5  
LYSMD1  
LYSMD3  
LYVE1  
LYZL4  
LZTFL1  
LZTR1  
LZTS1  
LZTS2  
M6PR  
MACF1  
MACROD1  
MACROD2  
MAD1L1  
MAD2L1  
MAD2L1BP  
MADCAM1  
MADD  
MAEA  
MAEL  
MAF  
MAF1  
MAFA  
MAFB  
MAFF  
MAFG  
MAG  
MAGEB18  
MAGEB3  
MAGED2  
MAGEL2  
MAGI1  
MAGI2  
MAGI3  
MAGIX  
MAK

MAK10  
MAK16  
MAL  
MALAT1  
MALT1  
MAMDC2  
MAML1  
MAML2  
MAML3  
MAMLD1  
MAN1A2  
MAN1C1  
MAN2A1  
MAN2B2  
MAN2C1  
MANBA  
MANBAL  
MANEA  
MANEAL  
MANSC1  
MAP1LC3B  
MAP2K1  
MAP2K2  
MAP2K3  
MAP2K5  
MAP2K6  
MAP3K1  
MAP3K12  
MAP3K13  
MAP3K14  
MAP3K3  
MAP3K4  
MAP3K5  
MAP3K7  
MAP3K7IP1  
MAP3K7IP2  
MAP3K8  
MAP3K9  
MAP4K1  
MAP4K3  
MAP4K4  
MAP4K5  
MAP6D1  
MAPK11  
MAPK13  
MAPK14  
MAPK15  
MAPK1IP1L  
MAPK4  
MAPK6  
MAPK8  
MAPK9  
MAPKAP1

MAPKAPK3  
MAPKAPK5  
MAPRE2  
MAPRE3  
MAPT  
    Mar-01  
    Mar-10  
    Mar-02  
    Mar-05  
    Mar-07  
MARCKS  
MARCKSL1  
MARCO  
MARK2  
MARK3  
MARK4  
MARS  
MARS2  
MARVELD3  
MASP2  
MAST1  
MAST4  
MASTL  
MAT2A  
MAT2B  
MATK  
MATN1  
MATN2  
MATN3  
MATN4  
MAVS  
MAX  
MB  
MBD2  
MBD3  
MBI-39  
MBIP  
MBNL1  
MBNL2  
MBNL3  
MBOAT1  
MBOAT2  
MBP  
MBTD1  
MBTPS1  
MC3R  
MC4R  
MCART1  
MCART6  
MCC  
MCCC2  
MCF2  
MCF2L

MCFD2  
MCHR1  
MCL1  
MCM2  
MCM3  
MCM3AP  
MCM5  
MCM6  
MCM9  
MCOLN1  
MCOLN2  
MCPH1  
MCPT-PS1  
MCRS1  
MCTP2  
MCTS2  
MDFI  
MDFIC  
MDGA1  
MDH2  
MDK  
MDM1  
MDM2  
MDM4  
ME2  
MECOM  
MECP2  
MECR  
MED1  
MED11  
MED12  
MED13  
MED13L  
MED14  
MED16  
MED17  
MED18  
MED21  
MED22  
MED23  
MED24  
MED25  
MED26  
MED27  
MED28  
MED29  
MED30  
MED7  
MED8  
MED9  
MEF2A  
MEF2B  
MEF2D



MEG3  
MEGF10  
MEGF11  
MEGF8  
MEI1  
MEIG1  
MEIS1  
MEIS2  
MELK  
MEN1  
MEOX1  
MEOX2  
MEP1A  
MEP1B  
MEPCE  
MEPE  
MERTK  
MESDC1  
MESDC2  
MESP1  
METAP2  
METAPL1  
METT11D1  
METTL1  
METTL11A  
METTL11B  
METTL2  
METTL7A1  
METTL9  
MEX3A  
MEX3B  
MEX3C  
MEX3D  
MFAP3  
MFAP3L  
MFAP5  
MFG E8  
MFHAS1  
MFI2  
MFN2  
MFNG  
MFSD1  
MFSD10  
MFSD11  
MFSD2A  
MFSD4  
MFSD5  
MFSD7A  
MFSD7B  
MFSD7C  
MGA  
MGAT1  
MGAT3

MGAT4C  
MGAT5  
MGAT5B  
MGEA5  
MGL1  
MGLL  
MGMT  
MGP  
MGRN1  
MGST2  
MGST3  
MIAT  
MIB2  
MICAL1  
MICAL2  
MICAL3  
MICALL1  
MICALL2  
MID1  
MIDN  
MIER1  
MIER2  
MIER3  
MIF  
MILL2  
MINA  
MINK1  
MINPP1  
MIR1-1  
MIR1-2  
MIR122A  
MIR124A-1  
MIR124A-3  
MIR129-1  
MIR129-2  
MIR130A  
MIR133A-2  
MIR135B  
MIR138-1  
MIR145  
MIR146  
MIR148A  
MIR152  
MIR17  
MIR181A-1  
MIR181C  
MIR182  
MIR183  
MIR184  
MIR187  
MIR190  
MIR191  
MIR192

MIR196A-1  
MIR196B  
MIR200B  
MIR200C  
MIR202  
MIR203  
MIR205  
MIR206  
MIR21  
MIR210  
MIR216B  
MIR219-1  
MIR23A  
MIR24-1  
MIR26B  
MIR290  
MIR296  
MIR297-1  
MIR298  
MIR29A  
MIR29B-1  
MIR300  
MIR302B  
MIR30A  
MIR30D  
MIR31  
MIR320  
MIR322  
MIR33  
MIR330  
MIR331  
MIR34B  
MIR350  
MIR365-2  
MIR448  
MIR464  
MIR469  
MIR511  
MIR574  
MIR670  
MIR674  
MIR678  
MIR680-2  
MIR684-1  
MIR688  
MIR692-1  
MIR702  
MIR704  
MIR713  
MIR7-2  
MIR759  
MIR760  
MIR762

MIR802  
MIR874  
MIR9-1  
MIR9-2  
MIR92B  
MIR9-3  
MIR96  
MIRLET7B  
MIRLET7C-2  
MIRN193  
MIS12  
MITF  
MKI67  
MKI67IP  
MKKS  
MKL1  
MKL2  
MKLN1  
MKNK1  
MKRN1  
MKRN3  
MLANA  
MLEC  
MLF1IP  
MLF2  
MLH3  
MLL1  
MLL2  
MLL3  
MLL5  
MLLT1  
MLLT10  
MLLT11  
MLLT3  
MLLT4  
MLLT6  
MLPH  
MLXIP  
MMAA  
MMD2  
MME  
MMGT1  
MMGT2  
MMP11  
MMP14  
MMP17  
MMP2  
MMP20  
MMP25  
MMP28  
MMP9  
MMRN1  
MMRN2

MN1  
MND1  
MNT  
MNX1  
MOAP1  
MOBKL1A  
MOBKL2A  
MOBKL2B  
MOBKL2C  
MOBKL3  
MOBP  
MOCOS  
MOCOS2  
MOCOS3  
MOGAT1  
MOGAT2  
MON1B  
MON2  
MORC1  
MORC2A  
MORC3  
MORF4L1  
MORN1  
MORN3  
MOSC1  
MOSC2  
MOSPD4  
MOV10  
MPDZ  
MPHOSPH8  
MPHOSPH9  
MPP6  
MPP7  
MPPE1  
MPPED1  
MPPED2  
MPRIP  
MPV17L  
MPV17L2  
MPZL1  
MPZL2  
MR1  
MRAP2  
MRAS  
MRC2  
MREG  
MRGPRG  
MRM1  
MRPL1  
MRPL12  
MRPL13  
MRPL14  
MRPL15

MRPL17  
MRPL20  
MRPL21  
MRPL27  
MRPL33  
MRPL34  
MRPL35  
MRPL36  
MRPL39  
MRPL4  
MRPL40  
MRPL45  
MRPL48  
MRPL51  
MRPS10  
MRPS23  
MRPS24  
MRPS28  
MRPS35  
MRPS5  
MRPS6  
MRPS9  
MRRF  
MRS2  
MRVI1  
MSC  
MSGN1  
MSH2  
MSH3  
MSH4  
MSH6  
MSI1  
MSI2  
MSL1  
MSL3L2  
MSLN  
MSMB  
MSN  
MSRA  
MSRB2  
MSRB3  
MST1R  
MSTN  
MSX1  
MSX1AS  
MSX2  
MSX3  
MT1  
MT2  
MT3  
MTA1  
MTA2  
MTA3

MTAG2  
MTAP1A  
MTAP1B  
MTAP1S  
MTAP2  
MTAP4  
MTAP6  
MTAP7  
MTAP7D1  
MTCH2  
MTDH  
MTERF  
MTERFD1  
MTF1  
MTF2  
MTFR1  
MTHFD1  
MTHFD1L  
MTHFSD  
MTIF2  
MTIF3  
MTMR12  
MTMR14  
MTMR15  
MTMR3  
MTMR4  
MTMR7  
MTMR9  
MTOR  
MTR  
MTRF1L  
MTRR  
MTSS1  
MTSS1L  
MTUS1  
MTUS2  
MTVR2  
MUC13  
MUC20  
MUC4  
MUC5AC  
MUC6  
MUL1  
MUM1  
MURC  
MUSK  
MUTED  
MVK  
MVP  
MX2  
MXD1  
MXD3  
MXD4

MXI1  
MXRA7  
MYADM  
MYB  
MYBBP1A  
MYBL2  
MYBPC1  
MYC  
MYCBP  
MYCBP2  
MYCBPAP  
MYCL1  
MYCN  
MYD88  
MYH10  
MYH11  
MYH13  
MYH14  
MYH2  
MYH3  
MYH7  
MYH7B  
MYH9  
MYL10  
MYL12B  
MYL4  
MYLIP  
MYLK  
MYLK2  
MYLK3  
MYLPF  
MYNN  
MYO10  
MYO15  
MYO16  
MYO18A  
MYO18B  
MYO19  
MYO1B  
MYO1C  
MYO1D  
MYO1E  
MYO1F  
MYO1G  
MYO1H  
MYO3A  
MYO3B  
MYO5A  
MYO5B  
MYO5C  
MYO6  
MYOC  
MYOF



MYOM1  
MYOM2  
MYOM3  
MYOT  
MYOZ2  
MYOZ3  
MYPN  
MYPOP  
MYRIP  
MYST1  
MYST2  
MYST3  
MYST4  
MYT1  
MYT1L  
MZF1  
N28178  
N4BP1  
N4BP2  
N6AMT2  
NAAA  
NAB1  
NAB2  
NACC1  
NACC2  
NADK  
NADSYN1  
NAF1  
NAGA  
NAGK  
NAGS  
NANOG  
NANP  
NAP1L1  
NAP1L4  
NAP1L5  
NAPA  
NAPB  
NAPEPLD  
NAPG  
NAPRT1  
NARFL  
NARG1L  
NASP  
NAT1  
NAT10  
NAT11  
NAT13  
NAT6  
NAT8  
NAV1  
NAV2  
NBAS

NBEAL1  
NBEAL2  
NBL1  
NBN  
NCALD  
NCAM1  
NCAN  
NCAPD2  
NCAPH2  
NCDN  
NCEH1  
NCF2  
NCK2  
NCKAP5  
NCKAP5L  
NCKIPSD  
NCOA1  
NCOA3  
NCOA5  
NCOA6  
NCOA7  
NCOR1  
NCOR2  
NCRNA00085  
NDC80  
NDE1  
NDFIP1  
NDOR1  
NDP  
NDRG1  
NDRG3  
NDRG4  
NDST1  
NDST3  
NDUFA10  
NDUFA11  
NDUFA12  
NDUFA4L2  
NDUFA6  
NDUFA8  
NDUFA9  
NDUFAF2  
NDUFAF3  
NDUFAF4  
NDUFB2  
NDUFB4  
NDUFB5  
NDUFB7  
NDUFS1  
NDUFS4  
NDUFS6  
NDUFS8  
NDUFV1

NDUFV3  
NEAT1  
NEB  
NEBL  
NECAB2  
NECAB3  
NECAP2  
NEDD4  
NEDD4L  
NEDD9  
NEFL  
NEGR1  
NEIL2  
NEIL3  
NEK10  
NEK6  
NEK7  
NEK8  
NEK9  
NENF  
NEO1  
NES  
NESPAS  
NETO1  
NETO2  
NEURL1A  
NEURL2  
NEUROD1  
NEUROD2  
NEUROD4  
NEUROG1  
NF1  
NF2  
NFAM1  
NFASC  
NFAT5  
NFATC1  
NFATC2  
NFATC2IP  
NFATC3  
NFATC4  
NFE2  
NFE2L1  
NFE2L2  
NFE2L3  
NFIB  
NFIC  
NFIX  
NFKB1  
NFKB2  
NFKBIA  
NFKBIB  
NFKBIZ

NFU1  
NFX1  
NFYB  
NFYC  
NGDN  
NGF  
NGFR  
NGFRAP1  
NHEDC1  
NHEJ1  
NHLH1  
NHLH2  
NHLRC1  
NHLRC2  
NHLRC3  
NHP2L1  
NHS  
NHSL1  
NHSL2  
NICN1  
NID1  
NID2  
NIN  
NINJ2  
NINL  
NIPA1  
NIPA2  
NIPBL  
NIPSNAP1  
NIPSNAP3B  
NKAIN1  
NKAIN4  
NKD1  
NKIRAS1  
NKTR  
NKX2-1  
NKX2-3  
NKX2-6  
NKX2-9  
NKX6-1  
NKX6-2  
NKX6-3  
NLGN1  
NLGN2  
NLK  
NLN  
NLR4  
NLRP10  
NLRP12  
NLRP14  
NLRP3  
NLRP4A  
NLRP4F

NLRP9C  
NMB  
NMD3  
NME1  
NME2  
NME4  
NME7  
NMI  
NMNAT2  
NMRAL1  
NMT1  
NMT2  
NMUR2  
NNAT  
NNMT  
NNT  
NOD1  
NODAL  
NOL10  
NOL4  
NOL6  
NOL9  
NOLC1  
NOMO1  
NOP10  
NOP58  
NOS1  
NOS1AP  
NOS3  
NOSTRIN  
NOTCH1  
NOTCH2  
NOTCH3  
NOTO  
NOTUM  
NOV  
NOVA1  
NOX3  
NOXA1  
NPAS2  
NPAS4  
NPBWR1  
NPC1  
NPC2  
NPEPL1  
NPEPPS  
NPFRR2  
NPHP1  
NPHP3  
NPHP4  
NPHS1  
NPHS1AS  
NPL

NPM1  
NPM3  
NPNT  
NPPB  
NPPC  
NPR1  
NPR3  
NPTN  
NPTX1  
NPTX2  
NPTXR  
NPY1R  
NPY6R  
NQO1  
NQO2  
NR1D1  
NR1D2  
NR1I3  
NR2C2  
NR2C2AP  
NR2E1  
NR2F1  
NR2F2  
NR2F6  
NR3C2  
NR4A1  
NR4A3  
NR5A1  
NR5A2  
NR6A1  
NRARP  
NRAS  
NRBF2  
NRCAM  
NRD1  
NRF1  
NRG1  
NRG4  
NRIP1  
NRM  
NRP  
NRP2  
NRSN1  
NRSN2  
NRTN  
NRXN1  
NRXN2  
NRXN3  
NSD1  
NSDHL  
NSG2  
NSMAF  
NSMCE2

NSMCE4A  
NSUN2  
NSUN4  
NSUN6  
NSUN7  
NT5C2  
NT5DC1  
NT5DC2  
NT5DC3  
NT5M  
NTF3  
NTF5  
NTM  
NTN1  
NTN4  
NTNG2  
NTRK2  
NTRK3  
NTS  
NTSR2  
NUAK1  
NUAK2  
NUB1  
NUBP1  
NUCKS1  
NUDCD1  
NUDCD2  
NUDCD3  
NUDT1  
NUDT14  
NUDT16  
NUDT19  
NUDT2  
NUDT4  
NUDT7  
NUF2  
NUFIP1  
NUMA1  
NUMB  
NUMBL  
NUP107  
NUP153  
NUP155  
NUP160  
NUP188  
NUP205  
NUP210  
NUP210L  
NUP214  
NUP35  
NUP50  
NUP54  
NUP62CL

NUP93  
NUP98  
NUPL2  
NUSAP1  
NUT  
NUTF2  
NVL  
NWD1  
NXF1  
NXN  
NXNL1  
NXPH1  
NXPH3  
NXPH4  
NYNRIN  
NYX  
OAF  
OAS2  
OAS3  
OASL1  
OASL2  
OBFC1  
OBFC2A  
OBSL1  
OCIAD1  
OCIAD2  
OCLN  
ODC1  
ODF1  
ODF2  
ODF3B  
ODF3L1  
ODF3L2  
ODF4  
ODZ2  
ODZ3  
ODZ4  
OFCC1  
OGDH  
OGDHL  
OGT  
OIT1  
OLA1  
OLFM1  
OLFM2  
OLFML3  
OLFR1044  
OLFR1122  
OLFR1126  
OLFR129  
OLFR1318  
OLFR1338  
OLFR1339



OLFR1350  
OLFR1371  
OLFR1373  
OLFR1389  
OLFR1390  
OLFR1402  
OLFR1423  
OLFR1431  
OLFR1450  
OLFR1451  
OLFR15  
OLFR1513  
OLFR1514  
OLFR156  
OLFR159  
OLFR19  
OLFR26  
OLFR267  
OLFR273  
OLFR275  
OLFR288  
OLFR305  
OLFR307  
OLFR324  
OLFR39  
OLFR453  
OLFR464  
OLFR49  
OLFR52  
OLFR54  
OLFR545  
OLFR547  
OLFR70  
OLFR750  
OLFR76  
OLFR761  
OLFR821  
OLFR822  
OLFR835  
OLFR836  
OLFR873  
OLFR881  
OLFR883  
OLFR90  
OLFR92  
OLFR923  
OLFR924  
OLFR926  
OLFR93  
OLFR976  
OLFR978  
OLIG1  
OLIG2

OLIG3  
OMA1  
ONECUT1  
ONECUT2  
ONECUT3  
OEEP  
OPA1  
OPA3  
OPALIN  
OPCML  
OPLAH  
OPN4  
OPRL1  
OPTC  
OPTN  
ORAI1  
ORAI2  
ORAI3  
ORC2L  
ORC5L  
ORF61  
ORF63  
ORM1  
ORM2  
ORMDL3  
OS9  
OSBP  
OSBP2  
OSBPL10  
OSBPL1A  
OSBPL2  
OSBPL3  
OSBPL5  
OSBPL6  
OSBPL7  
OSBPL8  
OSBPL9  
OSCAR  
OSGEP  
OSM  
OSMR  
OSR1  
OSR2  
OSTF1  
OSTM1  
OTOF  
OTOP1  
OTOR  
OTOS  
OTP  
OTUB2  
OTUD1  
OTUD3

OTUD7A  
OTUD7B  
OTX1  
OTX2  
OTX2OS1  
OVOL1  
OVOL2  
OXA1L  
OXGR1  
OXNAD1  
OXR1  
OXSM  
OXSR1  
OXT  
P140  
P2RX4  
P2RX5  
P2RX7  
P2RY2  
P4HA1  
P4HA2  
PA2G4  
PABPC1  
PABPC1L  
PABPC3  
PABPC4  
PACRG  
PACRGL  
PACS1  
PACSIN1  
PACSIN2  
PADI1  
PADI2  
PADI4  
PAFAH1B3  
PAFAH2  
PAG1  
PAIP2  
PAIP2B  
PAK1  
PAK1IP1  
PAK2  
PAK4  
PAK6  
PAK7  
PALLD  
PALM  
PALM2  
PALMD  
PAM  
PAN3  
PANK1  
PANK2

PANK3  
PANK4  
PAOX  
PAPD4  
PAPD5  
PAPLN  
PAPOLA  
PAPPA  
PAPSS1  
PAPSS2  
PAQR3  
PAQR4  
PAQR5  
PAQR6  
PAQR7  
PAQR8  
PAQR9  
PARD3  
PARD3B  
PARD6B  
PARD6G  
PARK2  
PARK7  
PARL  
PARN  
PARP1  
PARP10  
PARP12  
PARP14  
PARP16  
PARP4  
PARP6  
PARP9  
PARS2  
PARVA  
PARVB  
PARVG  
PATL2  
PATZ1  
PAWR  
PAX1  
PAX2  
PAX5  
PAX6  
PAX6OS1  
PAX7  
PAX8  
PAX9  
PAXIP1  
PBK  
PBLD  
PBX1  
PBX3

PBX4  
PBXIP1  
PCBD1  
PCBD2  
PCBP1  
PCBP3  
PCBP4  
PCCB  
PCDH1  
PCDH17  
PCDH21  
PCDH8  
PCDH9  
PCDHA1  
PCDHA10  
PCDHA11  
PCDHA12  
PCDHA2  
PCDHA3  
PCDHA4  
PCDHA5  
PCDHA6  
PCDHA7  
PCDHA8  
PCDHA9  
PCDHAC1  
PCDHAC2  
PCDHB22  
PCDHGA1  
PCDHGA10  
PCDHGA11  
PCDHGA12  
PCDHGA2  
PCDHGA3  
PCDHGA4  
PCDHGA5  
PCDHGA6  
PCDHGA7  
PCDHGA8  
PCDHGA9  
PCDHGB1  
PCDHGB2  
PCDHGB4  
PCDHGB5  
PCDHGB6  
PCDHGB7  
PCDHGB8  
PCDHGC3  
PCDHGC4  
PCDHGC5  
PCF11  
PCGF2  
PCGF3

PCGF5  
PCGF6  
PCIF1  
PCK1  
PCLO  
PCMTD1  
PCNT  
PCNX  
PCNXL2  
PCOLCE  
PCOLCE2  
PCP4L1  
PCSK1N  
PCSK2  
PCSK6  
PCTK2  
PCTK3  
PCTP  
PCX  
PCYOX1L  
PCYT1B  
PDAP1  
PDCD1  
PDCD10  
PDCD2  
PDCD2L  
PDCD4  
PDCD6IP  
PDCD7  
PDCL2  
PDCL3  
PDE10A  
PDE11A  
PDE1A  
PDE1B  
PDE3A  
PDE3B  
PDE4A  
PDE4C  
PDE4D  
PDE4DIP  
PDE5A  
PDE6A  
PDE6C  
PDE6H  
PDE7B  
PDE8A  
PDE8B  
PDE9A  
PDGFA  
PDGFB  
PDGFC  
PDGFD

PDGFRA  
PDGFRB  
PDGFRL  
PDHB  
PDHX  
PDIA4  
PDIA5  
PDIA6  
PDIK1L  
PDK1  
PDK3  
PDK4  
PDLIM1  
PDLIM2  
PDLIM3  
PDLIM5  
PDP1  
PDP2  
PDPK1  
PDPN  
PDSSA  
PDSS1  
PDSS2  
PDX1  
PDXDC1  
PDXK  
PDZD2  
PDZD4  
PDZK1  
PDZK1IP1  
PDZRN3  
PDZRN4  
PEA15A  
PEBP1  
PEBP4  
PECAM1  
PECI  
PECR  
PEF1  
PEG10  
PEG3  
PELI1  
PELI2  
PELP1  
PEMT  
PENK  
PEPD  
PERP  
PET112L  
PET117  
PEX10  
PEX12  
PEX14

PEX16  
PEX26  
PEX7  
PFAS  
PFDN1  
PFDN4  
PFKFB3  
PFKFB4  
PFKM  
PFKP  
PFN2  
PFTK2  
PGA5  
PGAP1  
PGBD1  
PGBD5  
PGC  
PGD  
PGF  
PGGT1B  
PGLYRP2  
PGM1  
PGM2  
PGM3  
PGPEP1  
PGRMC1  
PGRMC2  
PGS1  
PHACTR1  
PHACTR3  
PHACTR4  
PHB  
PHC1  
PHC2  
PHF12  
PHF13  
PHF15  
PHF16  
PHF17  
PHF19  
PHF2  
PHF20  
PHF21A  
PHF21B  
PHF23  
PHF3  
PHF6  
PHF8  
PHIP  
PHKB  
PHKG1  
PHKG2  
PHLDA1



PHLDA2  
PHLDB1  
PHLDB2  
PHLPP1  
PHOSPHO1  
PHOSPHO2  
PHOX2A  
PHOX2B  
PHXR4  
PHYH  
PHYHD1  
PI4K2A  
PI4K2B  
PI4KB  
PIAS1  
PIAS3  
PIAS4  
PIBF1  
PIF1  
PIGH  
PIGL  
PIGM  
PIGT  
PIGX  
PIGYL  
PIGZ  
PIK3AP1  
PIK3C2B  
PIK3C2G  
PIK3CA  
PIK3CB  
PIK3CD  
PIK3CG  
PIK3IP1  
PIK3R1  
PIK3R2  
PIK3R3  
PIK3R5  
PIK3R6  
PIM1  
PIM3  
PIN1  
PINK1  
PION  
PIP4K2A  
PIP4K2C  
PIP5K1B  
PIPOX  
PISD-PS2  
PITPNA  
PITPNB  
PITPNC1  
PITPNM2

PITPNM3  
PITX1  
PITX2  
PIWIL1  
PIWIL2  
PIWIL4  
PJA1  
PKD1  
PKD1L2  
PKD2  
PKDCC  
PKDREJ  
PKHD1  
PKIB  
PKM2  
PKMYT1  
PKN1  
PKNOX1  
PKNOX2  
PKP1  
PKP2  
PKP3  
PKP4  
PLA1A  
PLA2G10  
PLA2G12B  
PLA2G15  
PLA2G16  
PLA2G1B  
PLA2G2C  
PLA2G2D  
PLA2G4B  
PLA2G4D  
PLA2G5  
PLA2G6  
PLA2G7  
PLA2R1  
PLAC1  
PLAT  
PLAU  
PLAUR  
PLB1  
PLBD1  
PLCB1  
PLCB3  
PLCB4  
PLCD1  
PLCE1  
PLCG2  
PLCH1  
PLCH2  
PLCL1  
PLCXD1

PLD1  
PLD2  
PLD3  
PLD4  
PLD5  
PLEC1  
PLEKHA1  
PLEKHA2  
PLEKHA3  
PLEKHA4  
PLEKHA5  
PLEKHA6  
PLEKHA7  
PLEKHB1  
PLEKHB2  
PLEKHF1  
PLEKHF2  
PLEKHG1  
PLEKHG3  
PLEKHG4  
PLEKHG5  
PLEKHG6  
PLEKHH1  
PLEKHH2  
PLEKHM1  
PLEKHM2  
PLEKHM3  
PLEKHO2  
PLG  
PLIN3  
PLK1S1  
PLK3  
PLK5  
PLLP  
PLOD1  
PLP1  
PLS1  
PLSCR1  
PLSCR4  
PLTP  
PLVAP  
PLXDC1  
PLXDC2  
PLXNA1  
PLXNA2  
PLXNA4  
PLXNB2  
PLXNC1  
PM20D1  
PMAIP1  
PMEPA1  
PMFBP1  
PML

PMM1  
PMP22  
PMPCA  
PMVK  
PNKD  
PNKP  
PNLDC1  
PNLIP  
PNMA2  
PNMAL2  
PNO1  
PNP1  
PNP2  
PNPLA1  
PNPLA2  
PNPLA3  
PNPLA7  
PNRC1  
PNRC2  
PODNL1  
PODXL  
POFUT2  
POGZ  
POLA1  
POLA2  
POLD1  
POLE2  
POLE4  
POLG  
POLI  
POLL  
POLQ  
POLR1B  
POLR1D  
POLR1E  
POLR2A  
POLR2E  
POLR2H  
POLR3B  
POLR3D  
POLR3E  
POLR3GL  
POLR3K  
POMC  
POMP  
POMT2  
PON2  
POP4  
POP5  
POPDC2  
POR  
PORCN  
POU2F1

POU2F2  
POU2F3  
POU3F1  
POU3F2  
POU3F3  
POU4F1  
POU4F2  
POU5F1  
POU6F1  
PPA1  
PPA2  
PPAN  
PPAP2A  
PPAP2B  
PPAPDC1A  
PPAPDC3  
PPARA  
PPARD  
PPARG  
PPARGC1A  
PPARGC1B  
PPAT  
PPCDC  
PPDPF  
PPFIA1  
PPFIA2  
PPFIA4  
PPFIBP1  
PPFIBP2  
PPIA  
PPIB  
PPIC  
PPIE  
PPM1A  
PPM1B  
PPM1D  
PPM1H  
PPM1J  
PPM1K  
PPM1L  
PPME1  
PPOX  
PPP1CB  
PPP1CC  
PPP1R10  
PPP1R12A  
PPP1R13B  
PPP1R13L  
PPP1R14A  
PPP1R14D  
PPP1R15B  
PPP1R16A  
PPP1R1B

PPP1R2  
PPP1R3C  
PPP1R9A  
PPP1R9B  
PPP2CA  
PPP2CB  
PPP2R1A  
PPP2R1B  
PPP2R2A  
PPP2R2B  
PPP2R2C  
PPP2R3A  
PPP2R3C  
PPP2R4  
PPP2R5A  
PPP2R5C  
PPP2R5D  
PPP3CA  
PPP3CC  
PPP4R1L  
PPP5C  
PPRC1  
PPTC7  
PPWD1  
PPYR1  
PQLC1  
PRAM1  
PRAMEF12  
PRAMEF8  
PRAMEL5  
PRAMEL7  
PRC1  
PRCC  
PRDM1  
PRDM10  
PRDM12  
PRDM14  
PRDM16  
PRDM2  
PRDM9  
PRDX1  
PRDX2  
PRDX3  
PRDX6  
PRDX6-RS1  
PREI4  
PRELID2  
PRELP  
PREP  
PREPL  
PREX1  
PREX2  
PRG4

PRICKLE1  
PRICKLE2  
PRIM2  
PRIMA1  
PRKAA1  
PRKAA2  
PRKAB1  
PRKAB2  
PRKACA  
PRKACB  
PRKAG1  
PRKAG2  
PRKAR1A  
PRKAR1B  
PRKAR2A  
PRKAR2B  
PRKCA  
PRKCB  
PRKCD  
PRKCDBP  
PRKCE  
PRKCH  
PRKCI  
PRKCZ  
PRKD2  
PRKD3  
PRKDC  
PRKG1  
PRKG2  
PRKRA  
PRKRIP1  
PRKRIR  
PRLH  
PRLHR  
PRLR  
PRMT1  
PRMT10  
PRMT3  
PRMT6  
PRMT8  
PRND  
PRNP  
PROC  
PRODH  
PRODH2  
PROK2  
PROKR1  
PROKR2  
PROL1  
PROS1  
PRPF4B  
PRPF6  
PRPS1

PRPSAP1  
PRR14  
PRR15  
PRR5  
PRRC1  
PRRG2  
PRRG4  
PRRT4  
PRRX1  
PRRX2  
PRRXL1  
PRSS16  
PRSS27  
PRSS34  
PRSS36  
PRSS39  
PRSS45  
PRSS48  
PRSS8  
PRTG  
PRUNE  
PRUNE2  
PRX  
PSAP  
PSAT1  
PSD2  
PSEN2  
PSIP1  
PSKH1  
PSMA1  
PSMA3  
PSMA6  
PSMA7  
PSMB1  
PSMB10  
PSMB2  
PSMB4  
PSMB6  
PSMB7  
PSMB9  
PSMC1  
PSMC3  
PSMC4  
PSMC5  
PSMC6  
PSMD1  
PSMD12  
PSMD13  
PSMD14  
PSMD4  
PSMD7  
PSMD9  
PSME2



PSME4  
PSMG1  
PSMG3  
PSMG4  
PSORS1C2  
PSPH  
PSTK  
PSTPIP2  
PTAR1  
PTBP1  
PTCH1  
PTCH2  
PTCHD2  
PTDSS1  
PTDSS2  
PTEN  
PTGER3  
PTGES  
PTGFRN  
PTGIS  
PTGR1  
PTGR2  
PTGS1  
PTGS2  
PTH1R  
PTH2  
PTHLH  
PTK2  
PTMA  
PTMS  
PTOV1  
PTP4A1  
PTP4A2  
PTPDC1  
PTPLA  
PTPLAD2  
PTPLB  
PTPN1  
PTPN11  
PTPN12  
PTPN13  
PTPN14  
PTPN18  
PTPN20  
PTPN21  
PTPN3  
PTPN4  
PTPN5  
PTPN9  
PTPRA  
PTPRB  
PTPRD  
PTPRE

PTPRF  
PTPRG  
PTPRJ  
PTPRK  
PTPRM  
PTPRN2  
PTPRO  
PTPRQ  
PTPRR  
PTPRS  
PTPRT  
PTPRU  
PTRF  
PTTG1  
PTTG1IP  
PTX3  
PUM1  
PURA  
PUS7L  
PVR  
PVRL1  
PVRL2  
PVRL3  
PVRL4  
PVT1  
PWP2  
PWWP2A  
PWWP2B  
PXDN  
PXK  
PXMP4  
PXN  
PYCARD  
PYCR2  
PYGB  
PYGL  
PYGO1  
PYROXD2  
PYY  
QARS  
QK  
QPCT  
QRICH2  
QSER1  
QSOX1  
QSOX2  
QTRT1  
R3HCC1  
R3HDM2  
R3HDML  
R74862  
RAB1  
RAB11A

RAB11FIP1  
RAB11FIP2  
RAB11FIP3  
RAB11FIP4  
RAB11FIP5  
RAB12  
RAB14  
RAB15  
RAB17  
RAB19  
RAB20  
RAB21  
RAB23  
RAB25  
RAB27A  
RAB2A  
RAB30  
RAB31  
RAB32  
RAB34  
RAB37  
RAB38  
RAB39  
RAB3A  
RAB3B  
RAB3D  
RAB3GAP1  
RAB3GAP2  
RAB3IL1  
RAB3IP  
RAB40B  
RAB4A  
RAB5A  
RAB5C  
RAB6  
RAB6B  
RAB7  
RAB7L1  
RAB9  
RABAC1  
RABEP2  
RABGAP1  
RABGAP1L  
RABGEF1  
RABGGTB  
RABIF  
RABL3  
RABL4  
RAC1  
RAC2  
RACGAP1  
RAD17  
RAD18

RAD21  
RAD23B  
RAD51  
RAD52  
RAD54B  
RAD54L2  
RAD9B  
RADIL  
RAE1  
RAF1  
RAI1  
RAI14  
RALA  
RALB  
RALBP1  
RALGAPA1  
RALGAPA2  
RALGAPB  
RALGDS  
RALGPS1  
RALGPS2  
RALY  
RAMP1  
RAN  
RANBP10  
RANBP17  
RANBP3  
RANBP3L  
RANBP9  
RANGAP1  
RAP1B  
RAP1GAP  
RAP1GAP2  
RAP1GDS1  
RAP2A  
RAP2C  
RAPGEF1  
RAPGEF3  
RAPGEF4  
RAPGEF5  
RAPH1  
RAPSN  
RARA  
RARB  
RARG  
RARRES1  
RARRES2  
RARS  
RARS2  
RASA2  
RASA4  
RASAL2  
RASD1

RASD2  
RASGEF1A  
RASGEF1B  
RASGRF1  
RASGRF2  
RASGRP2  
RASGRP3  
RASL10A  
RASL11A  
RASL11B  
RASSF10  
RASSF3  
RASSF5  
RASSF7  
RASSF8  
RAVER1  
RAX  
RB1  
RB1CC1  
RBBP5  
RBBP7  
RBBP8  
RBBP9  
RBKS  
RBL2  
RBM14  
RBM15  
RBM17  
RBM18  
RBM25  
RBM26  
RBM34  
RBM39  
RBM4  
RBM41  
RBM42  
RBM44  
RBM47  
RBM9  
RBMS1  
RBMS2  
RBMS3  
RBMX  
RBMXL2  
RBMXRT  
RBP2  
RBP7  
RBPJ  
RBPJL  
RBPMS  
RBPMS2  
RBX1  
RC3H1

RCAN1  
RCAN2  
RCAN3  
RCC1  
RCC2  
RCE1  
RCL1  
RCN1  
RCOR1  
RCOR2  
RCOR3  
RCSD1  
RD3  
RDH10  
RDH14  
RDM1  
RDX  
RECQL5  
REEP1  
REEP3  
REEP4  
REEP5  
REFBP2  
RELA  
RELL1  
RELL2  
RENBP  
REPIN1  
REPS1  
REPS2  
RER1  
RERE  
RERG  
REST  
RETN  
RETNLA  
RETNLG  
REV1  
REV3L  
REX2  
REXO1  
RFC2  
RFC4  
RFC5  
RFESD  
RFFL  
RFK  
RFPL4  
RFT1  
RFTN1  
RFTN2  
RFWD2  
RFX1

RFX2  
RFX3  
RFX5  
RFX7  
RFX8  
RFXANK  
RG9MTD1  
RGL2  
RGMA  
RGMB  
RGN  
RGNEF  
RGS12  
RGS14  
RGS16  
RGS20  
RGS3  
RGS5  
RGS6  
RGS8  
RGS9  
RGS9BP  
RHBDD2  
RHBDF1  
RHBDF2  
RHBDL2  
RHBDL3  
RHBG  
RHCG  
RHD  
RHEB  
RHOB  
RHOBTB2  
RHOBTB3  
RHOF  
RHOH  
RHOQ  
RHOT1  
RHOU  
RHOV  
RHOX9  
RHPN1  
RHPN2  
RIAN  
RIBC2  
RIC3  
RIF1  
RILPL1  
RIMBP2  
RIMBP3  
RIMKLA  
RIMKLB  
RIMS1

RIMS2  
RIMS3  
RIMS4  
RIN1  
RIN2  
RINL  
RIOK1  
RIOK3  
RIPK4  
RIPPLY1  
RIPPLY2  
RIPPLY3  
RIT1  
RIT2  
RLBP1  
RLF  
RLIM  
RLN1  
RLTPR  
RMND5B  
RN4.5S  
RNASE1  
RNASE10  
RNASE6  
RNASE9  
RNASEH1  
RNASEH2A  
RNASEH2B  
RNASEH2C  
RNASEK  
RNASEN  
RND1  
RND2  
RND3  
RNF10  
RNF103  
RNF11  
RNF111  
RNF112  
RNF115  
RNF121  
RNF122  
RNF125  
RNF126  
RNF13  
RNF130  
RNF138  
RNF139  
RNF144A  
RNF144B  
RNF145  
RNF150  
RNF157



RNF165  
RNF169  
RNF17  
RNF170  
RNF180  
RNF181  
RNF183  
RNF185  
RNF187  
RNF19A  
RNF19B  
RNF2  
RNF214  
RNF216  
RNF219  
RNF220  
RNF31  
RNF32  
RNF34  
RNF38  
RNF39  
RNF4  
RNF43  
RNF44  
RNF5  
RNF7  
RNF8  
RNFT1  
RNGTT  
RNH1  
RNPC3  
RNPEP  
RNPS1  
RNU1B2  
ROBLD3  
ROBO1  
ROBO4  
ROCK1  
ROCK2  
ROD1  
ROR1  
ROR2  
RORA  
RORB  
RP1  
RP1L1  
RP2H  
RP9  
RPA1  
RPAP1  
RPAP3  
RPF1  
RPGRIP1

RPH3A  
RPH3AL  
RPIA  
RPL10A  
RPL10L  
RPL11  
RPL14  
RPL17  
RPL19  
RPL21  
RPL22  
RPL22L1  
RPL24  
RPL27  
RPL29  
RPL37A  
RPL38  
RPL39L  
RPL41  
RPL7  
RPLP0  
RPLP1  
RPN1  
RPP14  
RPP25  
RPPH1  
RPRD2  
RPRL2  
RPS10  
RPS11  
RPS12  
RPS13  
RPS14  
RPS15A  
RPS16  
RPS17  
RPS18  
RPS19  
RPS20  
RPS21  
RPS24  
RPS26  
RPS27A  
RPS3  
RPS3A  
RPS4X  
RPS6KA1  
RPS6KA2  
RPS6KA5  
RPS6KB1  
RPS6KL1  
RPTN  
RPTOR

RPUSD4  
RRAGA  
RRAGB  
RRAGC  
RRAGD  
RRAS2  
RREB1  
RRM1  
RRM2  
RRM2B  
RRN3  
RRP15  
RRP1B  
RRP8  
RRP9  
RRS1  
RSAD1  
RSBN1  
RSBN1L  
RSC1A1  
RSF1  
RSHL1  
RSL24D1  
RSPH4A  
RSPH9  
RSPO4  
RSPRY1  
RSRC1  
RSU1  
RTBDN  
RTCD1  
RTDR1  
RTKN  
RTKN2  
RTN1  
RTN3  
RTN4  
RTN4IP1  
RTN4R  
RTN4RL1  
RTN4RL2  
RTP1  
RUFY1  
RUFY3  
RUFY4  
RUNDC2A  
RUNX1  
RUNX1T1  
RUNX2  
RUNX3  
RUSC1  
RUSC2  
RWDD2A

RWDD4A  
RXFP1  
RXFP2  
RXRA  
RXRG  
RYBP  
RYK  
RYR2  
S100A1  
S100A10  
S100A16  
S100A3  
S100A6  
S100A7A  
S100Z  
S1PR1  
S1PR2  
S1PR3  
SAAL1  
SACS  
SAE1  
SAFB2  
SAG  
SALL1  
SALL2  
SALL3  
SALL4  
SAMD1  
SAMD14  
SAMD4  
SAMD4B  
SAMD5  
SAMD7  
SAMHD1  
SAMM50  
SAP130  
SAP18  
SAP30  
SAP30BP  
SAP30L  
SAPS1  
SAPS3  
SAR1A  
SARM1  
SARS  
SART1  
SASH1  
SASH3  
SASS6  
SAT2  
SATB1  
SATB2  
SBK1

SBK2  
SBNO1  
SC4MOL  
SC5D  
SCAI  
SCAMP1  
SCAMP2  
SCAMP3  
SCAMP4  
SCAMP5  
SCAP  
SCAPER  
SCARA3  
SCARB1  
SCARB2  
SCARF1  
SCARF2  
SCARNA13  
SCARNA3A  
SCARNA3B  
SCCPDH  
SCD1  
SCD2  
SCD3  
SCD4  
SCEL  
SCFD2  
SCG2  
SCG3  
SCGB1A1  
SCGB1C1  
SCGB3A1  
SCGN  
SCHIP1  
SCLT1  
SCMH1  
SCML4  
SCN10A  
SCN1A  
SCN2B  
SCN3B  
SCN4A  
SCN4B  
SCN5A  
SCN8A  
SCN9A  
SCNN1A  
SCNN1G  
SCOC  
SCP2  
SCPEP1  
SCPPPQ1  
SCRG1

SCRIB  
SCRN1  
SCRT1  
SCRT2  
SCT  
SCUBE1  
SCUBE2  
SCUBE3  
SCYL2  
SCYL3  
SDAD1  
SDC3  
SDC4  
SDCCAG1  
SDCCAG3  
SDCCAG8  
SDHC  
SDHD  
SDK1  
SDK2  
SDR9C7  
SDSL  
SEC11A  
SEC11C  
SEC14L1  
SEC14L3  
SEC14L4  
SEC23A  
SEC23B  
SEC23IP  
SEC24A  
SEC24B  
SEC31A  
SEC31B  
SEC61B  
SEC61G  
SEC63  
SEH1L  
SEL1L  
SEL1L2  
SEL1L3  
SELE  
SELENBP1  
SELENBP2  
SELK  
SELL  
SELPLG  
SEMA3B  
SEMA3D  
SEMA3E  
SEMA4A  
SEMA4B  
SEMA4D

SEMA5A  
SEMA5B  
SEMA6B  
SEMA6C  
SEMA6D  
SEMA7A  
SENP6  
SENP7  
Sep-15  
SEPHS1  
SEPHS2  
SEPN1  
SEPSECS  
Sep-01  
Sep-11  
Sep-03  
Sep-06  
Sep-08  
Sep-09  
SEPX1  
SERBP1  
SERF2  
SERGEF  
SERHL  
SERINC1  
SERINC2  
SERINC5  
SERP2  
SERPINA3H  
SERPINA3N  
SERPINB1A  
SERPINB6A  
SERPINB6C  
SERPINB9  
SERPINC1  
SERPINE1  
SERPING1  
SERPINI1  
SERTAD2  
SERTAD3  
SERTAD4  
SESN1  
SESN2  
SESN3  
SESTD1  
SET  
SETBP1  
SETD4  
SETD5  
SETD7  
SETDB1  
SETMAR  
SETX

SEZ6  
SEZ6L  
SEZ6L2  
SF3A1  
SF3B1  
SF3B5  
SFN  
SFPI1  
SFPQ  
SFRP1  
SFRP4  
SFRS1  
SFRS13A  
SFRS13B  
SFRS15  
SFRS18  
SFRS2  
SFRS2IP  
SFRS3  
SFRS4  
SFRS5  
SFRS6  
SFRS8  
SFRS9  
SFTP  
SFXN1  
SFXN4  
SFXN5  
SGCA  
SGCB  
SGCD  
SGCE  
SGK1  
SGK3  
SGMS1  
SGMS2  
SGOL2  
SGPL1  
SGPP1  
SGSH  
SGSM1  
SGSM3  
SGTA  
SGTB  
SH2B1  
SH2B3  
SH2D3C  
SH2D4A  
SH2D4B  
SH2D5  
SH3BGR  
SH3BGR3  
SH3BP1



SH3BP4  
SH3BP5L  
SH3GL1  
SH3GL2  
SH3GL3  
SH3KBP1  
SH3PXD2A  
SH3PXD2B  
SH3RF1  
SH3RF2  
SH3RF3  
SH3TC1  
SHANK2  
SHANK3  
SHB  
SHBG  
SHC1  
SHC3  
SHC4  
SHD  
SHE  
SHF  
SHH  
SHISA2  
SHISA4  
SHISA5  
SHISA7  
SHKBP1  
SHMT2  
SHOC2  
SHOX2  
SHPRH  
SHQ1  
SHROOM1  
SHROOM2  
SHROOM3  
SI  
SIAE  
SIAH1A  
SIAH1B  
SIAH2  
SIAH3  
SIDT2  
SIGIRR  
SIGLEC5  
SIGLECG  
SIK1  
SIK2  
SIK3  
SIKE1  
SIL1  
SIM1  
SIM2

SIN3A  
SIN3B  
SIP1  
SIPA1  
SIPA1L1  
SIPA1L2  
SIPA1L3  
SIRPA  
SIRT1  
SIRT3  
SIRT4  
SIRT6  
SIT1  
SIX1  
SIX2  
SIX3  
SIX3OS1  
SIX4  
SIX6  
SIX6OS1  
SKAP1  
SKAP2  
SKI  
SKIL  
SKP1A  
SKP2  
SLAIN1  
SLAIN2  
SLAMF6  
SLAMF9  
SLBP  
SLC10A1  
SLC10A7  
SLC11A2  
SLC12A1  
SLC12A2  
SLC12A3  
SLC12A4  
SLC12A5  
SLC12A7  
SLC12A8  
SLC12A9  
SLC13A3  
SLC13A5  
SLC14A2  
SLC15A1  
SLC16A1  
SLC16A11  
SLC16A13  
SLC16A14  
SLC16A5  
SLC16A6  
SLC16A7

SLC16A9  
SLC17A5  
SLC17A7  
SLC17A9  
SLC19A1  
SLC19A2  
SLC19A3  
SLC1A1  
SLC1A3  
SLC1A4  
SLC1A5  
SLC1A7  
SLC20A1  
SLC22A14  
SLC22A16  
SLC22A3  
SLC22A5  
SLC22A6  
SLC22A8  
SLC23A1  
SLC23A2  
SLC24A1  
SLC24A2  
SLC24A3  
SLC24A4  
SLC24A5  
SLC24A6  
SLC25A1  
SLC25A10  
SLC25A11  
SLC25A12  
SLC25A13  
SLC25A14  
SLC25A15  
SLC25A16  
SLC25A17  
SLC25A19  
SLC25A2  
SLC25A21  
SLC25A22  
SLC25A24  
SLC25A25  
SLC25A26  
SLC25A27  
SLC25A28  
SLC25A3  
SLC25A30  
SLC25A33  
SLC25A34  
SLC25A36  
SLC25A39  
SLC25A4  
SLC25A40

SLC25A42  
SLC25A43  
SLC25A5  
SLC26A10  
SLC26A11  
SLC26A2  
SLC26A4  
SLC26A5  
SLC26A8  
SLC26A9  
SLC27A1  
SLC27A3  
SLC27A4  
SLC27A5  
SLC28A1  
SLC28A3  
SLC29A1  
SLC29A2  
SLC29A3  
SLC29A4  
SLC2A1  
SLC2A10  
SLC2A12  
SLC2A2  
SLC2A3  
SLC2A4  
SLC2A6  
SLC2A7  
SLC2A9  
SLC30A1  
SLC30A10  
SLC30A2  
SLC30A5  
SLC31A2  
SLC32A1  
SLC34A2  
SLC34A3  
SLC35A1  
SLC35A3  
SLC35B1  
SLC35B2  
SLC35B3  
SLC35C1  
SLC35C2  
SLC35D1  
SLC35E4  
SLC35F1  
SLC35F2  
SLC35F4  
SLC35F5  
SLC36A2  
SLC36A3  
SLC37A2

SLC37A3  
SLC38A1  
SLC38A10  
SLC38A2  
SLC38A4  
SLC38A7  
SLC38A8  
SLC38A9  
SLC39A10  
SLC39A11  
SLC39A12  
SLC39A14  
SLC39A3  
SLC39A4  
SLC39A8  
SLC39A9  
SLC3A2  
SLC40A1  
SLC41A1  
SLC41A2  
SLC41A3  
SLC43A1  
SLC43A2  
SLC43A3  
SLC44A1  
SLC44A2  
SLC44A3  
SLC44A5  
SLC45A1  
SLC45A3  
SLC45A4  
SLC46A1  
SLC46A3  
SLC47A1  
SLC48A1  
SLC4A1  
SLC4A10  
SLC4A11  
SLC4A1AP  
SLC4A3  
SLC4A4  
SLC4A5  
SLC4A8  
SLC4A9  
SLC5A11  
SLC5A4A  
SLC5A4B  
SLC5A5  
SLC5A6  
SLC6A1  
SLC6A11  
SLC6A12  
SLC6A14

SLC6A15  
SLC6A17  
SLC6A20A  
SLC6A3  
SLC6A5  
SLC6A6  
SLC6A7  
SLC6A8  
SLC6A9  
SLC7A1  
SLC7A10  
SLC7A11  
SLC7A12  
SLC7A14  
SLC7A15  
SLC7A5  
SLC7A8  
SLC8A3  
SLC9A1  
SLC9A3R1  
SLC9A8  
SLC9A9  
SLC02A1  
SLC04A1  
SLC05A1  
SLFN5  
SLFN9  
SLIT1  
SLIT2  
SLIT3  
SLK  
SLMO1  
SLN  
SMAD1  
SMAD2  
SMAD3  
SMAD4  
SMAD6  
SMAD7  
SMAGP  
SMAP1  
SMARCA2  
SMARCA4  
SMARCAD1  
SMARCC1  
SMARCC2  
SMARCD1  
SMARCD2  
SMARCD3  
SMARCE1  
SMC2  
SMC3  
SMCHD1

SMCR7  
SMCR7L  
SMG1  
SMG6  
SMG7  
SMOC1  
SMOC2  
SMOX  
SMPD1  
SMPD3  
SMPD4  
SMPDL3B  
SMS  
SMTN  
SMTNL2  
SMU1  
SMUG1  
SMURF1  
SMURF2  
SMYD1  
SMYD3  
SNAI1  
SNAP91  
SNAPC3  
SNCAIP  
SNCG  
SND1  
SNED1  
SNF8  
SNHG10  
SNHG11  
SNHG6  
SNN  
SNORA74A  
SNORA75  
SNORD12  
SNORD58B  
SNORD72  
SNRNP200  
SNRNP48  
SNRPA  
SNRPB2  
SNRPE  
SNRPN  
SNTA1  
SNTB2  
SNTG1  
SNTG2  
SNTN  
SNUPN  
SNX1  
SNX10  
SNX11

SNX12  
SNX15  
SNX17  
SNX18  
SNX2  
SNX20  
SNX21  
SNX24  
SNX25  
SNX26  
SNX29  
SNX3  
SNX30  
SNX31  
SNX32  
SNX4  
SNX5  
SNX6  
SNX8  
SNX9  
SOAT1  
SOAT2  
SOBP  
SOCS1  
SOCS2  
SOCS3  
SOCS5  
SOCS6  
SOCS7  
SOD1  
SOD2  
SOD3  
SOLH  
SORBS1  
SORBS2  
SORBS3  
SORCS1  
SORCS2  
SORCS3  
SORL1  
SORT1  
SOS1  
SOST  
SOX1  
SOX10  
SOX11  
SOX12  
SOX13  
SOX14  
SOX17  
SOX18  
SOX2  
SOX21



SOX20T  
SOX3  
SOX30  
SOX4  
SOX5  
SOX6  
SOX7  
SOX9  
SP1  
SP100  
SP110  
SP2  
SP3  
SP4  
SP5  
SP6  
SP7  
SP8  
SPACA1  
SPACA3  
SPAG16  
SPAG17  
SPAG6  
SPAG8  
SPAG9  
SPAM1  
SPARC  
SPARCL1  
SPATA1  
SPATA13  
SPATA17  
SPATA19  
SPATA2  
SPATA21  
SPATA22  
SPATA24  
SPATA2L  
SPATA3  
SPATA5  
SPATA6  
SPATC1  
SPATS1  
SPATS2  
SPC24  
SPC25  
SPCS3  
SPDEF  
SPEER3  
SPEER5-PS1  
SPEF1  
SPEF2  
SPEG  
SPEN

SPESP1  
SPG11  
SPG21  
SPG7  
SPHK2  
SPIB  
SPIC  
SPIN4  
SPINK2  
SPINT1  
SPINT2  
SPIRE1  
SPIRE2  
SPNA2  
SPNB1  
SPNB2  
SPNB3  
SPNB4  
SPNS2  
SPNS3  
SPO11  
SPOCD1  
SPOCK1  
SPOCK2  
SPOP  
SPP1  
SPP2  
SPPL3  
SPR  
SPRED1  
SPRED2  
SPRED3  
SPRY1  
SPRY2  
SPRY4  
SPRYD3  
SPSB1  
SPSB3  
SPSB4  
SPTLC2  
SPTLC3  
SPZ1  
SQLE  
SRBD1  
SRC  
SRCRB4D  
SRD5A1  
SRD5A3  
SREBF1  
SREBF2  
SRF  
SRFBP1  
SRGAP1

SRGAP2  
SRGAP3  
SRL  
SRP14  
SRP19  
SRP68  
SRP9  
SRPK1  
SRPK2  
SRPR  
SRR  
SRRM1  
SRRM2  
SRRM3  
SRRM4  
SRXN1  
SS18  
SSBP2  
SSBP3  
SSBP4  
SSFA2  
SSH1  
SSH2  
SSPN  
SSPO  
SSR2  
SSR3  
SSTR2  
SSTR3  
SSU72  
SSX2IP  
ST13  
ST14  
ST3GAL2  
ST3GAL3  
ST3GAL4  
ST3GAL5  
ST5  
ST6GAL1  
ST6GAL2  
ST6GALNAC2  
ST6GALNAC3  
ST6GALNAC4  
ST6GALNAC5  
ST6GALNAC6  
ST7  
ST8SIA1  
ST8SIA2  
ST8SIA3  
ST8SIA4  
ST8SIA5  
ST8SIA6  
STAB2

STAC  
STAC2  
STAC3  
STAG1  
STAMBPL1  
STAP1  
STAR  
STARD10  
STARD13  
STARD3NL  
STARD4  
STARD8  
STAT3  
STAT5B  
STC1  
STC2  
STEAP2  
STEAP3  
STFA3  
STIM1  
STIM2  
STIP1  
STK10  
STK11IP  
STK24  
STK3  
STK30  
STK31  
STK32A  
STK32C  
STK35  
STK38  
STK38L  
STK39  
STMN1  
STMN2  
STMN3  
STMN4  
STOM  
STOML1  
STOML2  
STON1  
STON2  
STOX2  
STRA13  
STRA8  
STRADA  
STRADB  
STRAP  
STRC  
STRN  
STRN3  
STT3B

STUB1  
STX11  
STX12  
STX16  
STX1B  
STX2  
STX3  
STX4A  
STX6  
STX7  
STX8  
STXBP1  
STXBP2  
STXBP5  
STXBP5L  
STYK1  
SUB1  
SUCLA2  
SUCLG1  
SUCLG2  
SUDS3  
SUFU  
SUGT1  
SUHW4  
SULF1  
SULF2  
SULT1C1  
SULT5A1  
SULT6B1  
SUMF1  
SUMO2  
SUMO3  
SUNC1  
SUSD2  
SUSD4  
SUSD5  
SUV39H1  
SUV39H2  
SUV420H1  
SUZ12  
SV2A  
SV2C  
SVIL  
SVIP  
SVOP  
SVS1  
SWAP70  
SYAP1  
SYCN  
SYCP1  
SYDE2  
SYK  
SYN1

SYN3  
SYNC  
SYNCRIP  
SYNE1  
SYNE2  
SYNGR2  
SYNJ2  
SYNPO  
SYNPO2L  
SYNPR  
SYP  
SYPL  
SYS1  
SYT1  
SYT11  
SYT13  
SYT15  
SYT16  
SYT2  
SYT3  
SYT4  
SYT6  
SYT7  
SYT8  
SYT9  
SYTL1  
SYTL2  
SYVN1  
T  
T2  
TAAR5  
TAAR6  
TAAR9  
TAC2  
TAC4  
TACC1  
TACC2  
TACC3  
TACR1  
TACSTD2  
TADA2A  
TADA3  
TAF1  
TAF13  
TAF15  
TAF1D  
TAF3  
TAF4A  
TAF5L  
TAF7  
TAF8  
TAF9  
TAGAP

TAGLN2  
TAL1  
TAL2  
TALDO1  
TANC1  
TANC2  
TANK  
TAOK1  
TAOK3  
TAPBP  
TAPT1  
TARBP1  
TARS  
TARSL2  
TAS1R2  
TAS2R118  
TASP1  
TAX1BP1  
TBATA  
TBC1D1  
TBC1D10A  
TBC1D10C  
TBC1D12  
TBC1D14  
TBC1D15  
TBC1D16  
TBC1D2  
TBC1D21  
TBC1D22B  
TBC1D23  
TBC1D24  
TBC1D25  
TBC1D2B  
TBC1D30  
TBC1D4  
TBC1D7  
TBC1D8  
TBC1D9  
TBC1D9B  
TBCA  
TBCB  
TBCC  
TBCCD1  
TBCD  
TBCEL  
TBK1  
TBKBP1  
TBL1X  
TBL1XR1  
TBR1  
TBRG1  
TBRG4  
TBX10

TBX15  
TBX2  
TBX20  
TBX21  
TBX3  
TBX4  
TBX5  
TBXAS1  
TCAM1  
TCEA1  
TCEA2  
TCEB1  
TCEB3  
TCF12  
TCF15  
TCF19  
TCF20  
TCF21  
TCF23  
TCF25  
TCF3  
TCF4  
TCF7  
TCF7L1  
TCF7L2  
TCFAP2A  
TCFAP2C  
TCFAP4  
TCFCP2  
TCFCP2L1  
TCFE3  
TCFEB  
TCHH  
TCHP  
TCL1  
TCL1B2  
TCOF1  
TCP1  
TCP11  
TCP11L1  
TCP11L2  
TCTA  
TCTE1  
TCTE2  
TCTEX1D1  
TCTN2  
TDGF1  
TDH  
TDRD12  
TDRD3  
TDRD5  
TDRD7  
TDRD9



TEAD1  
TEAD2  
TEAD3  
TEAD4  
TEC  
TECPR1  
TECPR2  
TECR  
TECT1  
TECTA  
TEDDM1  
TEF  
TEK  
TEKT2  
TEKT3  
TEKT5  
TELO2  
TENC1  
TEP1  
TERC  
TERF1  
TERF2  
TERF2IP  
TERT  
TESC  
TESK2  
TET1  
TET2  
TEX10  
TEX14  
TEX15  
TEX19.1  
TEX2  
TEX21  
TEX261  
TEX264  
TEX9  
TFB1M  
TFDP1  
TFPI  
TFRC  
TG  
TGDS  
TGFA  
TGFBI  
TGFBR1  
TGFBR2  
TGFBR3  
TGIF1  
TGIF2  
TGM1  
TGM2  
TGM3

TGS1  
TH1L  
THA1  
THADA  
THAP1  
THAP6  
THBD  
THBS1  
THBS3  
THBS4  
THEG  
THEM4  
THEMIS  
THNSL2  
THOC2  
THOC3  
THOC4  
THPO  
THRA  
THRAP3  
THRB  
THRSP  
THSD4  
THSD7A  
THUMPD1  
THUMPD2  
THUMPD3  
THY1  
TIAL1  
TIAM1  
TIAM2  
TICAM1  
TICAM2  
TIFAB  
TIGD2  
TIGD3  
TIGD4  
TIMD4  
TIMM17A  
TIMM50  
TIMP2  
TIMP3  
TINAGL1  
TIPARP  
TIPIN  
TIPRL  
TJAP1  
TJP2  
TJP3  
TK1  
TKT  
TKTL2  
TLCD1

TLE3  
TLE4  
TLK1  
TLK2  
TLL1  
TLL2  
TLN1  
TLN2  
TLR1  
TLR2  
TLR4  
TLR5  
TLR8  
TLR9  
TLX1  
TLX2  
TLX3  
TM2D1  
TM2D3  
TM4SF20  
TM4SF5  
TM6SF1  
TM7SF2  
TM7SF3  
TM7SF4  
TM9SF2  
TM9SF3  
TMBIM1  
TMBIM4  
TMBIM6  
TMC1  
TMC3  
TMC6  
TMC7  
TMC8  
TMCC1  
TMCC2  
TMCC3  
TMCO4  
TMCO5  
TMCO5B  
TMCO6  
TMCO7  
TMED10  
TMED6  
TMED8  
TMED9  
TMEFF1  
TMEM100  
TMEM102  
TMEM104  
TMEM106A  
TMEM106B

TMEM106C  
TMEM107  
TMEM108  
TMEM11  
TMEM114  
TMEM115  
TMEM117  
TMEM119  
TMEM120A  
TMEM121  
TMEM123  
TMEM125  
TMEM130  
TMEM131  
TMEM132C  
TMEM132D  
TMEM132E  
TMEM135  
TMEM139  
TMEM141  
TMEM144  
TMEM146  
TMEM150C  
TMEM151B  
TMEM154  
TMEM158  
TMEM160  
TMEM161B  
TMEM163  
TMEM165  
TMEM167  
TMEM17  
TMEM170  
TMEM171  
TMEM173  
TMEM175  
TMEM176A  
TMEM177  
TMEM179  
TMEM180  
TMEM183A  
TMEM184B  
TMEM184C  
TMEM188  
TMEM19  
TMEM194B  
TMEM195  
TMEM2  
TMEM20  
TMEM200A  
TMEM201  
TMEM202  
TMEM203

TMEM205  
TMEM209  
TMEM211  
TMEM212  
TMEM219  
TMEM22  
TMEM220  
TMEM222  
TMEM229A  
TMEM229B  
TMEM231  
TMEM232  
TMEM233  
TMEM26  
TMEM28  
TMEM30B  
TMEM30C  
TMEM33  
TMEM37  
TMEM38B  
TMEM39A  
TMEM40  
TMEM41B  
TMEM44  
TMEM45A  
TMEM45B  
TMEM47  
TMEM48  
TMEM49  
TMEM50A  
TMEM50B  
TMEM51  
TMEM52  
TMEM53  
TMEM54  
TMEM55A  
TMEM55B  
TMEM57  
TMEM59L  
TMEM63A  
TMEM63B  
TMEM63C  
TMEM64  
TMEM65  
TMEM68  
TMEM74  
TMEM79  
TMEM8  
TMEM80  
TMEM82  
TMEM85  
TMEM87B  
TMEM88

TMEM89  
TMEM8B  
TMEM9  
TMEM90B  
TMEM91  
TMEM92  
TMEM93  
TMEM97  
TMEM98  
TMEM9B  
TMF1  
TMHS  
TMIE  
TMOD1  
TMOD2  
TMOD3  
TMPO  
TMPRSS11A  
TMPRSS11D  
TMPRSS13  
TMPRSS2  
TMPRSS5  
TMSB10  
TMSB4X  
TMTC1  
TMTC2  
TMTC3  
TMUB1  
TNF  
TNFAIP2  
TNFAIP3  
TNFAIP6  
TNFAIP8  
TNFAIP8L1  
TNFAIP8L3  
TNFRSF10B  
TNFRSF11A  
TNFRSF13B  
TNFRSF13C  
TNFRSF14  
TNFRSF17  
TNFRSF19  
TNFRSF1B  
TNFRSF21  
TNFRSF8  
TNFSF10  
TNFSF11  
TNFSF12-TNFSF13  
TNFSF15  
TNFSF18  
TNFSF4  
TNFSF9  
TNIK

TNIP1  
TNIP2  
TNK1  
TNK2  
TNKS  
TNKS1BP1  
TNKS2  
TNN  
TNNI1  
TNNT1  
TNNT2  
TNNT3  
TNP1  
TNPO1  
TNPO2  
TNPO3  
TNR  
TNRC18  
TNRC6A  
TNRC6B  
TNRC6C  
TNS1  
TNS3  
TNS4  
TNXB  
TOB1  
TOB2  
TOLLIP  
TOM1L1  
TOM1L2  
TOMM20  
TOMM40  
TOMM5  
TOMM7  
TOMM70A  
TOP1  
TOP1MT  
TOP2A  
TOP2B  
TOP3A  
TOP3B  
TOPBP1  
TOPORS  
TOR1A  
TOR1B  
TOR2A  
TOR3A  
TOX  
TOX2  
TOX3  
TPBG  
TPCN1  
TPCN2

TPD52  
TPD52L1  
TPH2  
TPM1  
TPM3  
TPR  
TPRA1  
TPRKB  
TPST1  
TPST2  
TPT1  
TPT1P  
TPX2  
TRA2B  
TRAF1  
TRAF2  
TRAF3  
TRAF3IP1  
TRAF3IP2  
TRAF3IP3  
TRAF4  
TRAFD1  
TRAIIP  
TRAK1  
TRAK2  
TRAM1  
TRAM2  
TRANK1  
TRAPPC10  
TRAPPC3  
TRAPPC4  
TRAPPC9  
TRCG1  
TRDN  
TREML2  
TREML4  
TRERF1  
TRFR2  
TRH  
TRHDE  
TRHR2  
TRIB1  
TRIB2  
TRIB3  
TRIM11  
TRIM13  
TRIM14  
TRIM16  
TRIM17  
TRIM2  
TRIM24  
TRIM25  
TRIM26



TRIM27  
TRIM28  
TRIM29  
TRIM3  
TRIM31  
TRIM33  
TRIM34  
TRIM36  
TRIM41  
TRIM44  
TRIM45  
TRIM47  
TRIM54  
TRIM56  
TRIM59  
TRIM6  
TRIM60  
TRIM62  
TRIM63  
TRIM66  
TRIM67  
TRIM71  
TRIM72  
TRIM8  
TRIM9  
TRIML1  
TRIML2  
TRIO  
TRIOBP  
TRIP11  
TRIP12  
TRIP13  
TRIP4  
TRIT1  
TRNAU1AP  
TRNP1  
TROAP  
TROVE2  
TRP53  
TRP53BP2  
TRP53I11  
TRP53INP2  
TRP53RK  
TRP63  
TRP73  
TRPC1  
TRPC7  
TRPM1  
TRPM3  
TRPM4  
TRPM7  
TRPS1  
TRPV2

TRPV4  
TRRAP  
TRUB1  
TSC1  
TSC22D1  
TSC22D2  
TSC22D3  
TSC22D4  
TSEN2  
TSFM  
TSGA10  
TSGA14  
TSHZ2  
TSHZ3  
TSIX  
TSKS  
TSKU  
TSN  
TSNAXIP1  
TSPAN11  
TSPAN12  
TSPAN13  
TSPAN14  
TSPAN15  
TSPAN17  
TSPAN18  
TSPAN32  
TSPAN33  
TSPAN4  
TSPAN5  
TSPAN6  
TSPAN8  
TSPAN9  
TSPO  
TSPYL1  
TSPYL5  
TSR2  
TSSC1  
TSSC4  
TSTA3  
TSTD2  
TSX  
TTBK1  
TTC1  
TTC12  
TTC13  
TTC15  
TTC18  
TTC19  
TTC21A  
TTC21B  
TTC25  
TTC28

TTC29  
TTC32  
TTC34  
TTC38  
TTC39B  
TTC39C  
TTC5  
TTC7  
TTC7B  
TTC8  
TTC9  
TTC9B  
TTF1  
TTL  
TLL1  
TLL11  
TLL12  
TLL13  
TLL5  
TLL6  
TLL8  
TTN  
TTPA  
TTPAL  
TTR  
TTYH1  
TTYH2  
TTYH3  
TUB  
TUBA1A  
TUBA1C  
TUBA3B  
TUBA4A  
TUBB2A  
TUBB2B  
TUBB3  
TUBB6  
TUBD1  
TUBG1  
TUBG2  
TUBGCP3  
TUFM  
TUFT1  
TULP1  
TULP2  
TULP3  
TUSC1  
TUSC3  
TUSC4  
TWF1  
TWIST2  
TWISTNB  
TWSG1

TXLNB  
TXN1  
TXN2  
TXNDC12  
TXNDC16  
TXNDC3  
TXNDC5  
TXNDC6  
TXNIP  
TXNL1  
TXNRD1  
TXNRD2  
TYK2  
TYMS  
TYRO3  
TYRP1  
TYSND1  
TYW3  
U2AF1  
U46068  
UACA  
UAP1L1  
UBA2  
UBAC2  
UBAP2  
UBAP2L  
UBASH3B  
UBB  
UBC  
UBE2A  
UBE2D1  
UBE2D2  
UBE2D3  
UBE2E2  
UBE2F  
UBE2G1  
UBE2G2  
UBE2H  
UBE2I  
UBE2J1  
UBE2K  
UBE2L3  
UBE2M  
UBE2O  
UBE2Q1  
UBE2Q2  
UBE2QL1  
UBE2R2  
UBE2S  
UBE2V1  
UBE2W  
UBE3C  
UBE4B

UBL3  
UBL4B  
UBL7  
UBLCP1  
UBN2  
UBP1  
UBQLN1  
UBQLN4  
UBR1  
UBR2  
UBR4  
UBR5  
UBR7  
UBTD1  
UBTD2  
UBTF  
UBXN1  
UBXN10  
UBXN11  
UBXN2A  
UBXN2B  
UBXN8  
UCHL3  
UCK2  
UCMA  
UCP1  
UEVLD  
UFC1  
UGCG  
UGDH  
UGGT1  
UGGT2  
UGT1A1  
UGT1A10  
UGT1A2  
UGT1A5  
UGT1A6A  
UGT1A6B  
UGT1A7C  
UGT1A9  
UGT2B34  
UGT3A1  
UHRF1  
UHRF1BP1  
UHRF1BP1L  
UHRF2  
UIMC1  
ULK1  
ULK2  
ULK3  
ULK4  
UMODL1  
UMPS

UNC13A  
UNC13B  
UNC45A  
UNC45B  
UNC5A  
UNC5B  
UNC5C  
UNC5CL  
UNC84A  
UNC84B  
UNC93B1  
UNCX  
UNG  
UNK  
UPB1  
UPF1  
UPF2  
UPF3A  
UPK1A  
UPK2  
UPK3A  
UPK3B  
UPP1  
UPP2  
UQCC  
UQCR  
UQCRB  
UQCRC1  
UQCRQ  
URM1  
USE1  
USH2A  
USHBP1  
USO1  
USP1  
USP10  
USP12  
USP13  
USP15  
USP16  
USP2  
USP20  
USP22  
USP24  
USP25  
USP26  
USP28  
USP29  
USP31  
USP33  
USP36  
USP37  
USP38

USP4  
USP43  
USP44  
USP46  
USP48  
USP49  
USP53  
USP6NL  
USP7  
USP8  
USP9X  
USPL1  
UST  
UTF1  
UTP11L  
UTP14A  
UTP14B  
UTP20  
UTP23  
UTP3  
UTRN  
UTS2R  
UTY  
UVRAG  
UXS1  
V1RC2  
V1RC25  
V1RE1  
V1RE8  
V1RJ3  
VAMP2  
VAMP4  
VANGL1  
VANGL2  
VAPA  
VAPB  
VARS  
VASH1  
VASH2  
VASP  
VAT1  
VAT1L  
VAV1  
VAV2  
VAV3  
VAX1  
VAX2OS1  
VAX2OS2  
VBP1  
VCAM1  
VCAN  
VCL  
VCP

VDAC1  
VDR  
VEGFA  
VEPH1  
VEZF1  
VGF  
VGLL3  
VGLL4  
VHL  
VIL1  
VILL  
VIM  
VIT  
VKORC1L1  
VMN2R100  
VMN2R107  
VMN2R108  
VMN2R112  
VMN2R24  
VMN2R66  
VMN2R67  
VMN2R87  
VMN2R90  
VMN2R-PS14  
VNN3  
VPREB2  
VPS11  
VPS13B  
VPS13D  
VPS18  
VPS24  
VPS28  
VPS37B  
VPS37C  
VPS37D  
VPS39  
VPS41  
VPS45  
VPS4A  
VPS53  
VPS72  
VPS8  
VRK1  
VSIG8  
VSTM2L  
VSX1  
VSX2  
VTA1  
VTI1A  
VTN  
VWA2  
VWA3A  
VWA5B1



VWC2  
VWC2L  
VWCE  
VWF  
WAPAL  
WASF1  
WASF2  
WASF3  
WASL  
WBP1  
WBP11  
WBP2  
WBP2NL  
WBP5  
WBP7  
WBSCR16  
WBSCR17  
WBSCR25  
WBSCR27  
WDFY2  
WDFY3  
WDFY4  
WDHD1  
WDR1  
WDR13  
WDR19  
WDR20A  
WDR25  
WDR26  
WDR34  
WDR36  
WDR37  
WDR38  
WDR4  
WDR41  
WDR43  
WDR45  
WDR47  
WDR5  
WDR51B  
WDR52  
WDR59  
WDR61  
WDR62  
WDR63  
WDR7  
WDR70  
WDR73  
WDR75  
WDR81  
WDR82  
WDR89  
WDR91

WDR93  
WDTC1  
WDYHV1  
WEE1  
WFDC1  
WFDC2  
WFDC6A  
WFS1  
WHAMM  
WHRN  
WHSC1  
WHSC1L1  
WIBG  
WIF1  
WIPF1  
WIPF2  
WIP11  
WIP12  
WISP2  
WISP3  
WIZ  
WNK1  
WNK2  
WNT10A  
WNT11  
WNT2B  
WNT3  
WNT3A  
WNT4  
WNT5B  
WNT6  
WNT7B  
WNT8B  
WRAP53  
WRNIP1  
WSB1  
WSB2  
WSCD1  
WSCD2  
WWC1  
WWC2  
WWOX  
WWP1  
WWP2  
WWTR1  
X99384  
XAF1  
XCL1  
XIAP  
XIRP1  
XKR5  
XKR8  
XPA

XPNPEP1  
XPNPEP2  
XPNPEP3  
XPO1  
XPO4  
XPO6  
XPO7  
XPOT  
XPR1  
XRCC1  
XRCC2  
XRCC5  
XRCC6BP1  
XRN2  
XYLB  
XYLT1  
YAF2  
YAP1  
YARS  
YARS2  
YBX2  
YEATS4  
YIPF1  
YIPF3  
YIPF5  
YIPF6  
YPEL1  
YPEL2  
YPEL3  
YPEL4  
YPEL5  
YTHDC1  
YTHDF3  
YWHAB  
YWHAE  
YWHAG  
YWHAH  
YWHAQ  
YWHAZ  
ZADH2  
ZAN  
ZAP70  
ZBBX  
ZBED3  
ZBED4  
ZBP1  
ZBTB1  
ZBTB10  
ZBTB12  
ZBTB16  
ZBTB17  
ZBTB2  
ZBTB20

ZBTB24  
ZBTB25  
ZBTB32  
ZBTB34  
ZBTB37  
ZBTB38  
ZBTB39  
ZBTB4  
ZBTB40  
ZBTB42  
ZBTB43  
ZBTB44  
ZBTB45  
ZBTB46  
ZBTB48  
ZBTB7A  
ZBTB7B  
ZBTB7C  
ZBTB8A  
ZBTB8B  
ZBTB9  
ZC3H11A  
ZC3H12A  
ZC3H12D  
ZC3H13  
ZC3H15  
ZC3H18  
ZC3H3  
ZC3H4  
ZC3H6  
ZC3H7A  
ZC3H8  
ZC3HAV1L  
ZC3HC1  
ZCCHC10  
ZCCHC12  
ZCCHC14  
ZCCHC16  
ZCCHC17  
ZCCHC24  
ZCCHC3  
ZCCHC7  
ZCCHC9  
ZCRB1  
ZDBF2  
ZDHHC1  
ZDHHC13  
ZDHHC14  
ZDHHC17  
ZDHHC18  
ZDHHC19  
ZDHHC2  
ZDHHC20

ZDHHC21  
ZDHHC22  
ZDHHC25  
ZDHHC7  
ZDHHC9  
ZEB1  
ZEB2  
ZFAND1  
ZFAND2A  
ZFAND5  
ZFAT  
ZFHX2  
ZFHX3  
ZFHX4  
ZFML  
ZFP1  
ZFP106  
ZFP11  
ZFP110  
ZFP111  
ZFP113  
ZFP114  
ZFP12  
ZFP120  
ZFP13  
ZFP142  
ZFP146  
ZFP148  
ZFP157  
ZFP160  
ZFP161  
ZFP184  
ZFP185  
ZFP191  
ZFP202  
ZFP212  
ZFP213  
ZFP217  
ZFP219  
ZFP229  
ZFP236  
ZFP248  
ZFP251  
ZFP263  
ZFP27  
ZFP273  
ZFP28  
ZFP280B  
ZFP280C  
ZFP281  
ZFP282  
ZFP286  
ZFP287

ZFP292  
ZFP3  
ZFP316  
ZFP319  
ZFP322A  
ZFP324  
ZFP326  
ZFP329  
ZFP335  
ZFP341  
ZFP345  
ZFP346  
ZFP354A  
ZFP358  
ZFP36  
ZFP362  
ZFP365  
ZFP366  
ZFP369  
ZFP36L1  
ZFP36L2  
ZFP37  
ZFP382  
ZFP385A  
ZFP385B  
ZFP385C  
ZFP386  
ZFP39  
ZFP395  
ZFP398  
ZFP40  
ZFP407  
ZFP41  
ZFP410  
ZFP42  
ZFP423  
ZFP428  
ZFP438  
ZFP444  
ZFP445  
ZFP446  
ZFP449  
ZFP451  
ZFP455  
ZFP458  
ZFP459  
ZFP462  
ZFP467  
ZFP493  
ZFP498  
ZFP503  
ZFP507  
ZFP512

ZFP513  
ZFP516  
ZFP518B  
ZFP521  
ZFP526  
ZFP532  
ZFP536  
ZFP54  
ZFP541  
ZFP568  
ZFP57  
ZFP59  
ZFP592  
ZFP598  
ZFP60  
ZFP606  
ZFP607  
ZFP608  
ZFP609  
ZFP612  
ZFP617  
ZFP618  
ZFP619  
ZFP628  
ZFP629  
ZFP637  
ZFP639  
ZFP64  
ZFP641  
ZFP644  
ZFP646  
ZFP647  
ZFP651  
ZFP652  
ZFP655  
ZFP658  
ZFP661  
ZFP667  
ZFP668  
ZFP687  
ZFP689  
ZFP691  
ZFP692  
ZFP7  
ZFP703  
ZFP704  
ZFP706  
ZFP708  
ZFP710  
ZFP712  
ZFP715  
ZFP719  
ZFP71-RS1

ZFP72  
ZFP74  
ZFP740  
ZFP760  
ZFP763  
ZFP771  
ZFP775  
ZFP777  
ZFP78  
ZFP780B  
ZFP788  
ZFP799  
ZFP800  
ZFP809  
ZFP810  
ZFP811  
ZFP819  
ZFP820  
ZFP825  
ZFP827  
ZFP831  
ZFP839  
ZFP84  
ZFP846  
ZFP867  
ZFP869  
ZFP870  
ZFP872  
ZFP882  
ZFP90  
ZFPM1  
ZFPM2  
ZFR  
ZFR2  
ZFX  
ZFY1  
ZFYVE1  
ZFYVE16  
ZFYVE26  
ZFYVE27  
ZFYVE28  
ZFYVE9  
ZG16  
ZGLP1  
ZHX2  
ZIC2  
ZIC3  
ZIC4  
ZIC5  
ZIM1  
ZKSCAN1  
ZKSCAN16  
ZKSCAN17



ZKSCAN3  
ZKSCAN5  
ZMAT3  
ZMAT4  
ZMIZ1  
ZMIZ2  
ZMYM1  
ZMYM3  
ZMYM4  
ZMYM6  
ZMYND11  
ZMYND12  
ZMYND19  
ZMYND8  
ZNHIT2  
ZNHIT6  
ZNRFF1  
ZNRFF2  
ZNRFF3  
ZNRFF4  
ZP3R  
ZPBP  
ZPBP2  
ZRANB1  
ZRANB2  
ZRANB3  
ZRSR1  
ZRSR2  
ZSCAN10  
ZSCAN18  
ZSCAN2  
ZSCAN21  
ZSCAN22  
ZSCAN5B  
ZSWIM1  
ZSWIM3  
ZSWIM5  
ZSWIM6  
ZW10  
ZWINT  
ZXDC  
ZYG11B  
ZYX  
ZZEF1  
ZZZ3
